# Supplementary material for: Minocycline and aspirin in the treatment of bipolar depression: a protocol for a proof-of-concept, randomised, double-blind, placebo-controlled, 2×2 clinical trial
Source: PubMed Central journal article supplement — BMJ Open. 2012 Feb 22;2(1):e000643. doi: 10.1136/bmjopen-2011-000643 (PMC3289990; doi:10.1136/bmjopen-2011-000643), 2012-02-22
Supplement: bmjopen-2011-000643.draft_revisions.pdf [file bmjopen-2011-000643.draft_revisions.pdf]

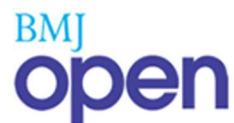

**MINOCYCLINE AND ASPIRIN IN THE TREATMENT OF BIPOLAR DEPRESSION: a randomized, double-blind, placebo-controlled, parallel-group clinical trial**

|                                 |                                                                                                                     |
|---------------------------------|---------------------------------------------------------------------------------------------------------------------|
| Journal:                        | <i>BMJ Open</i>                                                                                                     |
| Manuscript ID:                  | bmjopen-2011-000643                                                                                                 |
| Article Type:                   | Protocol                                                                                                            |
| Date Submitted by the Author:   | 17-Nov-2011                                                                                                         |
| Complete List of Authors:       | Savitz, Jonathan; LIBR<br>Preskorn, Sheldon<br>Teague, Kent<br>Drevets, Douglas<br>Yates, William<br>Drevets, Wayne |
| <b>Primary Subject Heading</b>: | Mental health                                                                                                       |
| Secondary Subject Heading:      | Pharmacology & therapeutics                                                                                         |
| Keywords:                       | Depression & mood disorders < PSYCHIATRY, Schizophrenia & psychotic disorders < PSYCHIATRY, CLINICAL PHARMACOLOGY   |
|                                 |                                                                                                                     |

SCHOLARONE™  
Manuscripts

1  
2  
3  
4  
5  
6  
7  
8  
9  
10  
11  
12  
13  
14  
15  
16  
17  
18  
19  
20  
21  
22  
23  
24  
25  
26  
27  
28  
29  
30  
31  
32  
33  
34  
35  
36  
37  
38  
39  
40  
41  
42  
43  
44  
45  
46  
47  
48  
49  
50  
51  
52  
53  
54  
55  
56  
57  
58  
59  
60

# MINOCYCLINE AND ASPIRIN IN THE TREATMENT OF BIPOLAR DEPRESSION: a randomized, double-blind, placebo- controlled, parallel-group clinical trial

Jonathan Savitz<sup>1,2</sup>, Ph.D., Sheldon H. Preskorn<sup>3</sup>, M.D., T. Kent Teague<sup>4</sup>,  
Ph.D., Douglas A. Drevets<sup>5</sup>, M.D., William Yates<sup>1</sup>, M.D., Wayne C.  
Drevets<sup>1,6\*</sup>, M.D.

Word Count = 8,424

Table = 1

Figures = 1

<sup>1</sup> Laureate Institute for Brain Research (LIBR), Tulsa, OK 74136, USA

<sup>2</sup> University of Tulsa, Tulsa, OK 74104, USA

<sup>3</sup> University of Kansas Clinical Research Institute, Wichita, KS 67214, USA

<sup>4</sup> Departments of Surgery and Psychiatry, University of Oklahoma College of Medicine, Tulsa,  
Department of Pharmaceutical Sciences, University of Oklahoma College of Pharmacy,  
Department of Microbiology and Biochemistry, Oklahoma State University Center for Health  
Sciences, Tulsa, OK 74135, USA

<sup>5</sup> Department of Medicine, Oklahoma University Health Sciences Center, and the Oklahoma City  
VAMC, Oklahoma City, OK 73014, USA

<sup>6</sup> Department of Psychiatry, University of Oklahoma College of Medicine, Tulsa, OK 74135,  
USA

\* Corresponding Author

[wdrevets@laureateinstitute.org](mailto:wdrevets@laureateinstitute.org)

LIBR

6655 South Yale Ave

Tulsa, OK 74136

Tel: 918 502 5102

Fax: 918 502 5135

## Key Words

Bipolar Depression, Clinical Trial, Minocycline, Aspirin, Inflammation

## ABSTRACT

**Introduction:** New medication classes are needed to improve treatment effectiveness in the depressed phase of bipolar disorder (BD). Extant evidence suggests that BD is characterized by neural changes such as dendritic remodeling and glial and neuronal cell loss. These changes have been hypothesized to result from chronic inflammation. The principal aims of the proposed research is to evaluate the antidepressant efficacy in bipolar depression of minocycline, a drug with neuroprotective and immune-modulating properties, and of aspirin, at doses expected to selectively inhibit cyclooxygenase 1 (COX-1). **Methods and Analysis:** One hundred and twenty outpatients between 18 and 55 years of age, who meet DSM-IV-TR criteria for BD (type I or II) and for a current major depressive episode will be recruited to take part in a randomized, double-blind, placebo-controlled, parallel-group clinical trial following a 2 x 2 design. As adjuncts to existing treatment, subjects will be randomized to receive one of four treatment combinations: placebo-minocycline plus placebo-aspirin, active-minocycline plus placebo-aspirin, placebo-minocycline plus active-aspirin, or active-minocycline plus active-aspirin. The dose of minocycline and aspirin is 100mg bid and 81mg bid, respectively. Antidepressant response will be evaluated by assessing changes in the Montgomery-Asberg Depression Rating Scale (MADRS) scores between baseline and the end of the 6 week trial. As secondary outcome measures, the anti-inflammatory effects of minocycline and aspirin will be tested by measuring pre-and-post treatment levels of CRP and inflammatory cytokines. **Ethics and Dissemination:** Minocycline has been widely used as an antibiotic in doses up to 400 mg/day. Low dose aspirin has been safely used on a worldwide scale for its role as an anti-thrombotic and thrombolytic. The study progress will be overseen by a Data, Safety and Monitoring Board which will meet once every 6 months. Results of the study will be published in peer-reviewed publications. **Registration:** Clinical Trials.gov: NCT01429272.

## INTRODUCTION

The treatment of bipolar depression remains a major challenge for psychiatry. The US FDA has not approved any of the ~25 standard antidepressants for the treatment of bipolar depression, partly because these agents have not been robustly effective in BD patients<sup>1</sup>. Thus, currently approved treatments for bipolar depression include lithium, quetiapine, and the combination of olanzapine and fluoxetine<sup>2</sup>. Other treatments used include lamotrigine, conventional antidepressant agents, other atypical antipsychotics, pramipexole or riluzole (reviewed in <sup>3</sup>). Unfortunately, the effectiveness of these options also is limited. For example, in a placebo-controlled study in which subjects receiving lithium were randomized to receive either standard antidepressant pharmacotherapy (paroxetine or imipramine) or placebo, those receiving lithium plus an antidepressant did not show a significant improvement over those receiving lithium plus placebo<sup>4</sup>. Similarly, in the STEP-BD trial, 42 of 179 subjects (23.5%) receiving a mood stabilizer plus adjunctive antidepressant drug treatment had a durable recovery, which did not differ significantly from 51 of 187 subjects (27.3%) receiving mood stabilizer plus placebo. Mallinger et al. reported a similar durable recovery rate in BD depressives treated with mood stabilizer plus paroxetine (27%), but found a higher rate for adjunctive monoamine oxidase inhibitors (MAOIs; 53%)<sup>5</sup>, consistent with the findings of previous studies comparing MAOIs vs imipramine<sup>6,7</sup>. Unfortunately MAOIs are commonly unacceptable to patients.

New classes of antidepressant drugs are needed for bipolar depression. Existing agents exert their primary actions on monoaminergic systems. The efficacy of these agents contributed to the monoamine-deficiency hypothesis of depression, which continues to receive empirical support. Nevertheless, the field is in the early stages of a paradigm shift driven by evidence of dendritic remodeling and neuronal atrophy in animal models of depression, and of reductions in gray matter (GM) volume, and glial cell loss at *postmortem* in BD<sup>8</sup>. The neurotrophic effects of lithium, coupled with longitudinal studies demonstrating volumetric changes over time, raise the possibility that mood disorders are underpinned by a neurotoxic process<sup>8,9</sup>. The final common pathway through

1  
2  
3 which neurotoxic agents exert their effect is hypothesized to involve excess glutamatergic  
4 signaling<sup>10</sup>.  
5  
6

7  
8  
9 The glutamatergic model of mood disorders is based on the premise that excessive  
10 stimulation of NMDA-glutamatergic receptors, results in neuronal atrophy and apoptosis  
11 of glial and/or neuronal cells, and *ipso facto*, depression. Evidence for this hypothesis  
12 derives from multiple sources. In preclinical models, riluzole, which inhibits neuronal  
13 release of glutamate, ceftriaxone, which increases glutamate reuptake, and NMDA  
14 receptor antagonists such as ketamine, ameliorate behavioral analogs of depression<sup>11</sup>. In  
15 addition, rats bred to be genetically sensitive to stress show differential expression of  
16 NMDA receptors<sup>12</sup>, and behavioral analogs of depression are abrogated in NMDA  
17 receptor subunit knockout mice<sup>13</sup>. In humans, increased serum levels of glutamate that  
18 resolve with antidepressant treatment were reported in MDD, and extended to the CSF  
19 post mortem<sup>11</sup>. Polymorphisms of the metabotropic glutamate receptor genes, GRM2 and  
20 GRM3, and a haplotype of the glutamic acid decarboxylase (GAD2) gene were  
21 associated with MDD<sup>14</sup>. Finally, ketamine induced a rapid, sustained antidepressant  
22 effect in BD<sup>15 16</sup> and riluzole showed promising results in treatment-resistant depression<sup>15</sup>  
23  
24  
25  
26  
27  
28  
29  
30  
31  
32  
33  
34  
35  
36  
37  
38  
39  
40  
41  
42  
43  
44  
45  
46  
47  
48  
49  
50  
51  
52  
53  
54  
55  
56  
57  
58  
59  
60

One potential cause of the disruption in glutamatergic signaling in BD is dysregulation of  
the immune system. Increased levels of proinflammatory cytokines such as interleukin 6  
(IL-6), IL-1 $\beta$ , interferon alpha (IFN $\alpha$ ), tumor necrosis factor alpha (TNF- $\alpha$ )  
prostaglandinE2 (PGE2), and chemokine ligand 2 (CCL2) are consistently observed in  
the blood and CSF of patients with mood disorders, both at baseline and after exposure to  
stressors<sup>17 18</sup>. Elevated serum levels of (pro-inflammatory) positive acute-phase proteins  
(e.g., haptoglobin,  $\alpha$ 1-antitrypsin, ceruloplasmin, C-reactive protein), but reduced levels  
of negative acute-phase proteins (e.g., albumin and retinal-binding protein) also are  
reported in mood disorders<sup>19-21</sup>. Further, treatment of hepatitis C with IFN $\alpha$  is known to  
induce the major depressive syndrome and/or manic symptoms in a significant minority  
of patients, and the efficacy of conventional antidepressant drugs is associated with a  
reduction in inflammation<sup>18</sup>. Moreover, anti-tumor necrosis factor (TNF) therapy (for

1  
2  
3 psoriasis) can improve mood<sup>22</sup>. Since proinflammatory cytokines can alter brain function,  
4 these data are compatible with evidence that an activated inflammatory response system  
5 exists in mood disorders which plays a role in their pathophysiology<sup>23-26</sup>.  
6  
7  
8

9  
10 The over-activity of the hypothalamic-pituitary-adrenal axis in mood disorders may play  
11 a role in inflammation, since hypersecretion of corticotrophin-releasing hormone (CRH)  
12 activates the transcription factor, nuclear factor kappa B (NF-κB). NF-κB regulates the  
13 expression of proinflammatory cytokines in immune cells in the CNS and periphery, and  
14 the expression of genes involved in apoptosis<sup>27</sup>. In addition, NF-κB may result in the  
15 expression of the class 1 major histocompatibility complex (MHC I), labeling cells for  
16 removal by cytotoxic T-cells<sup>27</sup>. Usually, cortisol suppresses this inflammatory response,  
17 but chronic stress appears to desensitize the glucocorticoid receptor (GR) and by  
18 extension, the anti-inflammatory effects of cortisol<sup>27</sup>. Cytokines play a role in  
19 desensitizing the system to cortisol. For example, IL1 and TNF-α retard dexamethasone-  
20 induced translocation of the GR receptor from the cytoplasm to the nucleus<sup>28</sup>.  
21  
22  
23  
24  
25  
26  
27  
28  
29  
30

31 The immunologic and glutamatergic models of BD are complementary because a  
32 proinflammatory state is one potential cause of excitotoxicity<sup>27</sup>. Peripheral inflammatory  
33 signals activate microglia in the brain, inducing an inflammatory cascade of cytokines  
34 and free radicals. Cytokines and reactive oxygen and nitrogen species exert a direct toxic,  
35 apoptotic effect on oligodendrocytes. Potentially through the loss of oligodendrocytes,  
36 oxidative stress can lead to demyelination. Such a process conceivably may account for  
37 the reduction in oligodendroglia found *postmortem* in the prefrontal cortex<sup>29</sup> in mood  
38 disorders. The inflammatory milieu also compromises astrocyte function, leading to  
39 down-regulation of glutamate transporters and impaired glutamate reuptake into  
40 astrocytes, further amplifying inflammatory signaling<sup>27</sup>.  
41  
42  
43  
44  
45  
46  
47  
48  
49  
50

51 In addition, cytokines such as interleukin 1 (IL-1), IL-6, and TNF-α activate indoleamine  
52 2, 3-dioxygenase (IDO). IDO catalyzes the breakdown of tryptophan, the amino-acid  
53 precursor of serotonin, and an important regulator of T-cell function, into kynurenine  
54 (Kyn)<sup>30</sup>. Activation of the Kyn pathway shunts tryptophan away from 5-HT synthesis,  
55  
56  
57  
58  
59  
60

1  
2  
3 putatively reducing serotonergic transmission. Kyn is in turn metabolized into quinolinic  
4 acid (Quin), a potent NMDA receptor agonist, and neuromodulator involved in lipid  
5 peroxidation, which can induce neuronal damage via oxidative stress and overstimulation  
6 of NMDA receptors<sup>30</sup>. Consistent with inflammation-related shunt towards Kyn  
7 metabolism, the plasma tryptophan-Kyn ratio was found to correlate inversely with  
8 striatal total choline (a putative cell membrane turnover biomarker) in adolescents with  
9 melancholic depression<sup>31</sup>.  
10  
11  
12  
13  
14  
15  
16

17  
18 The mRNA transcripts for proinflammatory genes appear particularly sensitive for  
19 discriminating BD patients. Microarray gene expression profiles in purified CD14+  
20 monocytes from whole blood of BD subjects, offspring of BD parents, and healthy  
21 controls (HC) displayed a distinct mRNA signature representing genes from  
22 inflammatory and inflammation-related pathways<sup>32</sup>. The signature showed >80%  
23 sensitivity and specificity in BD subjects who were not receiving lithium or antipsychotic  
24 drugs (n=11), and in affected offspring of a BD parent (n=13, of whom 10 had only  
25 manifested depression). A positive signature also was present in 17 of 38 unaffected  
26 offspring (45%) versus 13 of 70 healthy children (19%). Cross-sectional comparisons  
27 suggested lithium and antipsychotic drugs—but not conventional antidepressant drugs--  
28 down-regulated expression of most inflammatory genes. Thus, when medicated and  
29 unmedicated subjects were considered together only 23 of 42 BD patients (55%) had a  
30 positive signature versus 7 of 38 HCs (18%). Notably, the IL6 mRNA level remained  
31 elevated in medicated BD subjects and did not differ significantly from unmedicated  
32 subjects (table 1), suggesting that this assay identifies a proinflammatory diathesis even  
33 in treated cases.  
34  
35  
36  
37  
38  
39  
40  
41  
42  
43  
44  
45  
46  
47  
48  
49  
50  
51  
52  
53  
54  
55  
56  
57  
58  
59  
60

**Table 1:** Magnitude of difference in mRNA expression between mood disordered and healthy control (HC) samples from Padmos et al.<sup>32</sup>, showing selected transcripts in unmedicated subjects vs HCs, relative to that of medicated BD subjects.

| Gene Symbol | Unmedicated BD vs HC |         | Medicated BD vs HC |         | Affected offspring# vs HC |         |
|-------------|----------------------|---------|--------------------|---------|---------------------------|---------|
|             | fold change          | p-value | fold change        | p-value | fold change               | p-value |
| PDE4B       | 13.73*               | <.001   | 3.42               | <.001   | 5.79                      | <.001   |
| IL6         | 37.92                | .005    | 9.56               | .006    | 935.7                     | <.001   |
| CCL20       | 55.49                | .006    | 6.02               | .10     | 400.1                     | <.001   |

**Legend:** \* - difference significant between unmedicated vs medicated BD samples; # - affected with respect to having manifested either a depressive or a manic episode  
 Sample sizes: unmedicated BD n=11, medicated BD n=31, affected offspring n=13, HCs n=25 for comparisons against BD adults, n=70 for comparisons of offspring. Abbrev: BD – bipolar disorder; HC – healthy control; PDE4B - phosphodiesterase type 4B; IL6 - interleukin 6; CCL20-chemokine ligand 20

**Minocycline is a second-generation tetracycline that may prevent both glutamate-induced excitotoxicity and cytokine-induced inflammation in the CNS and periphery.**

Minocycline has high lipophilicity enabling efficient transfer across the blood brain barrier (BBB)<sup>33</sup> - its concentration in CSF reaches 11–56% of plasma concentrations<sup>34</sup>. Minocycline inhibits the microglial-mediated release of proinflammatory cytokines IL-1 $\beta$ , TNF- $\alpha$ , IL-6, and p38<sup>35</sup>, while promoting release of the anti-inflammatory cytokine, IL-10<sup>34</sup>. Moreover, minocycline inhibits matrix metalloproteinases which process



1  
2  
3 cytokines such as TNF- $\alpha$  and IL-1 $\beta$  into their biologically active forms<sup>35</sup>. Minocycline is  
4 also an effective scavenger of proapoptotic reactive oxygen species and protects against  
5 excitotoxicity by preventing glutamate-induced activation of nitric oxide synthase<sup>36</sup>.  
6 Nitric oxide facilitates glutamate release from presynaptic neurons and inhibits glial  
7 glutamate transporters, amplifying glutamatergic signaling, and contributing to  
8 excitotoxic cell death<sup>10</sup>. Minocycline also upregulates a key molecular factor in the  
9 apoptosis pathway, B-cell CLL/lymphoma 2 (BCL-2)<sup>37</sup>, an effect shared by lithium,  
10 valproate<sup>38</sup> and certain antidepressant drugs<sup>39</sup>. BCL-2 represses apoptosis induced by  
11 cytotoxic insults<sup>40</sup>.  
12  
13  
14  
15  
16  
17  
18  
19  
20

### 21 **Minocycline has neuroprotective and anti-inflammatory properties.**

22  
23  
24 Minocycline prevents glutamate-induced apoptosis of neurons *in vitro*<sup>41</sup>, prevents  
25 ischemia-induced activation of microglia in gerbils<sup>42</sup>, increases hippocampal neuron  
26 survival<sup>43</sup>, reduces lesion-volume and improves neurological function in mice with  
27 traumatic brain injury<sup>44</sup> and in fragile X syndrome<sup>45</sup>, reduces pro-inflammatory cytokine  
28 expression and improves neurological function and locomotor activity in rats with spinal  
29 cord injury<sup>46</sup>, attenuates MDMA-induced neurotoxicity of serotonin and dopamine  
30 systems in the cerebral cortex and hippocampus of mice<sup>47</sup>, reduces inflammation in a rat-  
31 model of rheumatoid arthritis (RA)<sup>48</sup>, and delays disease progression and demyelination  
32 in rodent models of encephalitis<sup>49</sup>, amyotrophic lateral sclerosis (ALS)<sup>50</sup> and  
33 Huntington's Disease (HD)<sup>51</sup>. Based on these data, minocycline was employed, and has  
34 shown promise as, a therapeutic agent in human diseases including HD<sup>52</sup>, rheumatoid  
35 arthritis (RA)<sup>53</sup>, and stroke<sup>54</sup>.  
36  
37  
38  
39  
40  
41  
42  
43  
44  
45  
46  
47

### 48 **Minocycline has been used to treat psychiatric disorders.**

49  
50  
51 Miyaoka et al.<sup>55</sup> discussed 2 patients with catatonic schizophrenia who benefited from  
52 minocycline. This group then conducted a 4-week trial with minocycline (150 mg/day) in  
53 22 patients with schizophrenia to evaluate its efficacy as an adjunct to antipsychotic  
54 drugs<sup>56</sup>. Patients showed a significant improvement in positive and negative symptoms.  
55  
56  
57  
58  
59  
60

1  
2  
3 Levkovitz et al.<sup>57</sup> recently studied 54 patients with early-stage schizophrenia treated for 6  
4 months with antipsychotic medication and either minocycline (200 mg/day) or placebo in  
5 a double-blind trial. Minocycline was associated with a reduction in negative symptoms  
6 and improved attention/ memory.  
7  
8  
9

10  
11  
12 The efficacy of minocycline has not been formally tested in mood disorders. In rodents,  
13 minocycline reduced immobility during the forced-swim test<sup>58</sup>, and co-administration of  
14 minocycline synergized the antidepressant-like actions of desipramine (but not  
15 fluoxetine)<sup>59</sup>. Minocycline also abrogated the depression-like behavior of rodents  
16 exposed to lipopolysaccharide (LPS)<sup>60</sup>. Levine et al.<sup>61</sup> presented the case of a 66-year old  
17 woman with severe BD, who observed that the tetracycline she took for an infection  
18 alleviated her depression. When her depression returned post-treatment, minocycline was  
19 reinitiated (150 mg/day). After one week her HAM-D score fell from 25 to 8.  
20  
21  
22  
23  
24  
25  
26  
27

### 28 **Aspirin (Acetyl-salicylic acid, ASA) also holds potential efficacy in bipolar disorder.**

29  
30  
31

32 The second aim of this study is to assess the antidepressant efficacy of ASA in bipolar  
33 depression. Using a 2 x 2 design we will obtain data providing estimates of the effect size  
34 of ASA relative to placebo, ASA relative to minocycline, and ASA in combination with  
35 minocycline relative to placebo. These data also will explore the specificity of any effect  
36 found for minocycline. The clinical use of low dose ASA primarily has been driven by its  
37 role as an anti-thrombotic and thrombolytic. Given the exaggerated death rate from  
38 cardiovascular events in BD, this action potentially is advantageous in the management  
39 of BD. Nevertheless, the recent literature also supports a role for low dose ASA in the  
40 management of the mood disorder itself, specifically in the amelioration of depressive  
41 symptoms.  
42  
43  
44  
45  
46  
47  
48  
49

50  
51 The mechanism of ASA relates to its capacity to inactivate irreversibly the  
52 cyclooxygenase (COX) activity of prostaglandin (PG) H-synthase-1 and PGH-synthase 2  
53 (referred to as COX-1 and COX-2, respectively). Although ASA has a short half-life (15  
54 to 20 min) ASA's permanent inhibition of COX-1 allows once daily dosing for anucleate  
55  
56  
57  
58  
59  
60

1  
2  
3  
4  
5  
6  
7  
8  
9  
10  
11  
12  
13  
14  
15  
16  
17  
18  
19  
20  
21  
22  
23  
24  
25  
26  
27  
28  
29  
30  
31  
32  
33  
34  
35  
36  
37  
38  
39  
40  
41  
42  
43  
44  
45  
46  
47  
48  
49  
50  
51  
52  
53  
54  
55  
56  
57  
58  
59  
60

platelets. In contrast, because nucleated cells rapidly regenerate this enzyme a shorter dosing interval is required to persistently impact COX activity in cells that mediate inflammatory processes. Moreover, ASA is 50- to 100-fold more potent in inhibiting platelet COX-1 than monocyte COX-2 activity<sup>62</sup>, so there is nearly a 100-fold variation in the daily dose of aspirin, as higher doses are used to target COX-2 in the management of treating peripheral inflammation (e.g., arthritis) or pain. As reviewed below, preliminary evidence obtained in BD suggests beneficial effects are achieved using ASA in low doses, where aspirin would inhibit COX-1, but not COX-2.

### **Aspirin has neuroprotective and anti-inflammatory properties.**

In the brain, recent data indicate that genetic manipulation of COX-1 and COX-2 differentially modulate leukocyte recruitment during neuroinflammation, and suggest that reduction of COX-1 activity is neuroprotective, whereas reduction in COX-2 activity is detrimental, during a primary neuroinflammatory response (reviewed in <sup>63</sup>). Choi et al.<sup>63</sup> propose that these distinct roles reflect the predominant localization of COX-1 in microglia, which play a major role in mediating neuroinflammation, in contrast to the predominant localization of COX-2 in pyramidal neurons. For example, Choi et al.<sup>64</sup> examined the effects of COX-1 or COX-2 deficiency on intracerebroventricular lipopolysaccharide (LPS)-induced neuroinflammation by comparing COX-1 (-/-) and COX-2 (-/-) knockout mice to wild-type (WT) (+/+) control animals. After LPS, leukocyte infiltration and inflammatory response were attenuated in the COX-1 (-/-) mice but increased in the COX-2 (-/-) mice, compared with WT controls. In another study, Choi et al.<sup>65</sup> examined the effect of COX-1 genetic deletion on the inflammatory response and neurodegeneration induced by  $\beta$ -amyloid, and found that in COX-1 (-/-) mice, the A $\beta$ <sub>1-42</sub>-induced inflammatory response and associated neuronal damage were attenuated compared to WT mice. Compatible with these results, in pharmacoepidemiological studies investigating whether chronic NSAID use reduced the risk of developing Alzheimer's disease (AD), indomethacin, a preferential COX-1 inhibitor, showed beneficial effects, while COX-2 selective inhibitors, failed to show any beneficial effect in AD patients with mild to severe cognitive impairment. These data

1  
2  
3 suggest the hypothesis that inhibition of COX-1 activity may be a valid therapeutic  
4 strategy to reduce the cerebral inflammatory response and neurodegeneration in  
5 neuropsychiatric diseases in which neuroinflammatory components play a role in  
6 pathophysiology.  
7  
8  
9

10  
11  
12 Other researchers hypothesized that NSAIDs would be beneficial in BD more specifically  
13 because of their ability to down-regulate activity in the brain arachidonic acid (AA)  
14 cascade by via interfering with phospholipase A2 (PLA2) and/or COX function. In  
15 rodents Rapoport and colleagues<sup>66-68</sup> demonstrated that conventional mood stabilizers  
16 decrease the AA turnover in phospholipids and the expression of PLA2 and/or COX  
17 enzymes. The PLA2 and COX enzymes catalyze, respectively, release of AA from  
18 membrane phospholipid and AA conversion to eicosanoids such as prostaglandin E2 and  
19 thromboxane B2. The AA cascade is involved in neuroreceptor-initiated signaling and  
20 can be pathologically upregulated by neuroinflammation and excitotoxicity.  
21  
22  
23  
24  
25  
26  
27  
28

29  
30 Nevertheless, aspirin has additional mechanisms that may underlie benefits in  
31 neuropsychiatric illness. While low-dose aspirin down-regulates AA cascade activity via  
32 inhibition of COX-1 activity, in higher doses it also down-regulates COX-2 gene  
33 transcription, increases levels of lipoxigenase-derived eicosanoids such as the anti-  
34 inflammatory lipoxin A4, and acetylates COX-2 protein to a modified enzyme that can  
35 convert unesterified AA to anti-inflammatory mediators such as 15-epi-lipoxin A4  
36 (reviewed in <sup>69</sup>). The acylated enzyme also can convert docosahexaenoic acid (DHA) to  
37 17-(R)-OH-DHA, which, like its metabolites di(R)-OH-DHA (neuroprotectin (R) D1)  
38 and tri(R)-OH-DHA (resolvin (R) D1), is highly anti-inflammatory (reviewed in <sup>69</sup>).  
39 Lithium given chronically to rats with lipopolysaccharide-induced neuroinflammation  
40 also increases the brain concentration of 17-OH-DHA. Thus, there may be a synergy  
41 between aspirin and lithium in forming anti-inflammatory brain DHA metabolites.  
42  
43  
44  
45  
46  
47  
48  
49  
50  
51

52  
53 **Aspirin appears effective in preliminary studies of mood disorders.**  
54  
55  
56  
57  
58  
59  
60

1  
2  
3  
4  
5  
6  
7  
8  
9  
10  
11  
12  
13  
14  
15  
16  
17  
18  
19  
20  
21  
22  
23  
24  
25  
26  
27  
28  
29  
30  
31  
32  
33  
34  
35  
36  
37  
38  
39  
40  
41  
42  
43  
44  
45  
46  
47  
48  
49  
50  
51  
52  
53  
54  
55  
56  
57  
58  
59  
60

Pharmaco-epidemiological data in BD supportive of these hypotheses were published by Stolk et al.<sup>69</sup>. Using the Netherlands based PHARMO Record Linkage System (which connects pharmacy dispensing records to hospital discharge records of > two million individuals since 1985), these researchers tested whether non-steroidal anti-inflammatory drugs (NSAIDs) or glucocorticoids would ameliorate bipolar symptoms. The target sample consisted of 5,145 patients receiving lithium (mean age = 48.6 ± 15 yrs; mean duration of lithium use=847 days), based upon the assumption that lithium treatment is relatively specific to individuals with BD. The main outcome measure was a calculated incidence density (ID) of medication events (change in the type or numbers of psychotropic medications prescribed, or increase [ $>30\%$ ] in the psychotropic drug dose). Subjects receiving low-dose ( $\leq 80$  mg/day) aspirin were 17% less likely to have a medication event, a finding that remained significant after adjusting for age, sex, chronic disease score and health care utilization. This effect was selective for low-dose ASA. In contrast, high-dose aspirin or non-selective NSAIDs (i.e., regimens expected to inhibit both COX-1 and -2), selective COX-2 inhibitors and glucocorticoids did not produce a statistically significant protection. Instead, the co-administration of non-selective NSAIDs and glucocorticoids was associated with statistically significant increases in medication events, suggesting destabilization of bipolar illness. The finding that low-dose aspirin decreased the number of medication events was particularly noteworthy since aspirin does not significantly augment serum lithium levels in contrast to selective COX-2 inhibitors which can raise lithium levels<sup>70</sup>. These preliminary observations thus appeared consistent with the hypothesis that COX-1 inhibitors can reduce neuroinflammatory processes and thus benefit BD patients.

Notably, the observation that beneficial effects in BD were conferred by low-dose ASA, but not by nonselective COX inhibitors, COX-2 inhibitors or glucocorticoids, appeared inconsistent with the hypothesis that drugs that down-regulate AA cascade activity in general hold therapeutic potential in BD. Thus the putative neuroprotective effects associated with COX-1 inhibition may contribute specifically to the benefits of low-dose aspirin in BD observed by Stolk et al. For example, as reviewed above, aspirin and

1  
2  
3 lithium may exert synergistic effects in forming anti-inflammatory brain DHA  
4 metabolites (reviewed in <sup>69</sup>).

5  
6  
7  
8  
9 Other data suggest that aspirin exerts antidepressant effects within the context of MDD or  
10 cardiovascular illness. Mendlewicz et al.<sup>71</sup> examined the effect of aspirin augmentation of  
11 conventional antidepressant pharmacotherapy in 24 patients with MDD who had proven  
12 non-responsive after 4 weeks of SSRI treatment. Participants were treated openly during  
13 the subsequent 4 weeks with aspirin 160 mg/day in addition to their SSRI regimen. The  
14 combined administration of SSRI plus aspirin was associated with a response rate of  
15 52.4%. Remission was achieved in 43% of the total sample and 82% of the responder  
16 sample. In the responder group, a significant improvement was observed within week 1  
17 and this benefit persisted through day 28. In another study Ketterer et al.<sup>72</sup> reported that  
18 in 174 males undergoing coronary angiography (of whom 99 were taking low-dose  
19 aspirin), aspirin use was associated with less depression and anxiety symptoms.  
20  
21  
22  
23  
24  
25  
26  
27  
28  
29

30 In contrast, a preliminary study of the selective COX-2 inhibitor, celecoxib, was negative  
31 in bipolar depression<sup>73</sup>, potentially compatible with the negative results of COX-2  
32 inhibitors reported by Stolk et al.<sup>69</sup>. In a double-blind, randomized, add-on clinical trial of  
33 celecoxib in patients (n = 28) studied during a depressed or mixed episode of BD, no  
34 significant difference was observed between the celecoxib and placebo add-on groups at  
35 study endpoint<sup>73</sup>. These results contrasted with those obtained using celecoxib in unipolar  
36 depression, however. In MDD, celecoxib augmentation of either reboxetine<sup>74</sup> or  
37 fluoxetine<sup>75</sup> was associated with a significant therapeutic effect on depressive symptoms  
38 in randomized, double-blind, add-on clinical trials.  
39  
40  
41  
42  
43  
44  
45  
46  
47

## 48 **METHODS AND ANALYSIS**

### 49 **Participants**

50  
51  
52  
53  
54  
55 One hundred and twenty male or female outpatients between 18 and 55 years of age, who  
56 meet DSM-IV-TR criteria for BD (type I or II) and for a current major depressive episode  
57  
58  
59  
60

1  
2  
3 will be recruited. The depressive syndrome must have been present for at least 4 weeks  
4 and the minimum threshold for depression severity will be set at a 17-item HAM-D score  
5  $\geq 18$ . Subjects will provide written informed consent as approved by the Western  
6  
7 Institutional Review Board.  
8  
9

### 10 11 12 **Concurrent Medications** 13

14  
15  
16 At study entry type I BD subjects must have been taking a stable dose of a mood-  
17 stabilizing medication (lithium, valproate, carbamazepine, lamotrigine, antipsychotic  
18 agents), for at least 4 weeks, dosed clinically to target the therapeutic range. Type II BD  
19 subjects will be included irrespective of whether they present on a mood stabilizer. To  
20 investigate the utility of this augmentation strategy in the population for whom  
21 minocycline is most likely to prove therapeutically relevant, volunteers receiving stable  
22 doses of mood stabilizing, antipsychotic, antidepressant, and/or anxiolytic drugs for at  
23 least 4 weeks will be included. However, volunteers who currently are receiving more  
24 than 4 psychotropic medications in a daily regimen will be excluded, since this condition  
25 may signify a more brittle or complex clinical state. Subjects may remain in  
26 psychotherapy or have no psychosocial intervention. Volunteers will be excluded if they  
27 currently are receiving medications likely to have adverse interactions with minocycline  
28 or aspirin, including warfarin, digoxin, penicillins, and isotretinoin products.  
29  
30  
31  
32  
33  
34  
35  
36  
37  
38  
39

40  
41 For participants who enter the study, the preferred strategy will be for subjects to  
42 maintain the same regimen of concurrent medications throughout the six week study so  
43 that only the study drug regimen will be altered per protocol. Nevertheless, changes to  
44 concurrent medications will not affect study status, so long as the medication change does  
45 not target a depressive or manic symptom. If changes to concurrent medication regimens  
46 are clinically required to address worsening depressive symptoms or the development of  
47 manic symptoms, then the subject will be dropped from the study.  
48  
49  
50  
51  
52

### 53 54 55 **Study Design** 56 57 58 59 60



1  
2  
3 Patients will participate in a randomized, double-blind, placebo-controlled, trial with a 2  
4 x 2 design. As adjuncts to existing treatment, subjects will receive placebo-minocycline  
5 plus placebo-aspirin, active-minocycline plus placebo-aspirin, placebo-minocycline plus  
6 active-aspirin, or active-minocycline plus active-aspirin. The randomization sequences  
7 will be determined by a research staff-member who is not obtaining clinical information  
8 from the research subject and will be assigned by subject number at consenting. The trial  
9 will be conducted over 6 weeks and will comprise 7 assessment sessions (figure 1). The  
10 subject will be seen at the prescribed time intervals within a window of two business days  
11 on either side of visit target date to complete the specified visits.  
12  
13  
14  
15  
16  
17  
18  
19

20  
21 At each session, a clinical assessment will be conducted using the rating scales listed  
22 below, and treatment side-effects will be assessed and rated for severity. To preserve the  
23 rater blind, the research staff member who conducts the clinical ratings will not be the  
24 research staff member who assesses the presence of side effects, and will remain blind to  
25 the information pertaining to side effects. Subjects who experience severe adverse effects  
26 or who develop treatment-associated hypomania or mania will be dropped from the  
27 study, instructed to discontinue the study medication, and referred for appropriate clinical  
28 management of these adverse events.  
29  
30  
31  
32  
33  
34  
35  
36

37 The primary outcome measure will be the change in the Montgomery-Asberg Depression  
38 Rating Scale (MADRS) scores.  
39  
40  
41

## 42 **Medication**

43  
44  
45

46 This pilot proof-of-concept study will adhere to the dosing limits and route of  
47 administration for the FDA indications for minocycline's and aspirin's use in other  
48 conditions (thus an IND is not required). A fixed dose design will be followed, and all  
49 medications will be administered via the p.o. route. The pilot data extant for both study  
50 drugs supports an onset of improvement within two weeks, so the six week study  
51 duration is expected to provide sufficient time to detect an antidepressant effect, to  
52  
53  
54  
55  
56  
57  
58  
59  
60



1  
2  
3 provide information about the persistence of the antidepressant effect over about one  
4 month from the anticipated onset of effect, and to minimize dropouts.  
5  
6

7  
8  
9 For minocycline the starting dose will be 100 mg b.i.d. (total daily dose=200 mg). This  
10 dose of 100 mg b.i.d. has been shown by a substantial literature to produce consistent  
11 anti-inflammatory effects in rheumatoid arthritis and other inflammatory disorders. This  
12 also is the dose used in a recent schizophrenia treatment trial<sup>57</sup>. The associated placebo  
13 capsules match the appearance of the 100 mg minocycline capsule.  
14  
15  
16

17  
18  
19 The starting dose of aspirin will be 81 mg p.o. b.i.d. This dose is sufficient to inhibit  
20 COX-1, and appeared beneficial in stabilizing the course of BD in the pharmaco-  
21 epidemiological study of Stolk et al.<sup>69</sup>. When aspirin is used as an anti-platelet drug once  
22 daily dosing is sufficient since anucleate platelets do not produce enough COX-1 to  
23 overcome the irreversible inhibition of COX-1 within a 24-hour period. In contrast, in  
24 nucleated cells COX-1 is replenished, so more frequent dosing is required to persistently  
25 inhibit COX-1. Thus we will administer the dose in a b.i.d. regimen, according to the  
26 guidelines described above. A total daily dose of 160 mg was administered in the  
27 preliminary study which reported that aspirin significantly augmented the antidepressant  
28 effects of fluoxetine in MDD<sup>71</sup>. The relevant placebo matches the appearance of the  
29 aspirin tablet.  
30  
31  
32  
33  
34  
35  
36  
37  
38  
39

40 Participants will be advised that one of the study drugs may reduce the efficacy of oral  
41 contraceptives, and to avoid taking the study drugs within 3 hours of iron products or of  
42 antacids containing calcium, magnesium or aluminum. They also will be advised that one  
43 study drug can increase their risk for bleeding during surgical procedure or if combined  
44 with other drugs or herbal preparations that reduce hemostasis.  
45  
46  
47  
48  
49

## 50 51 **Compensation**

52  
53  
54  
55 Participants will be compensated for participation in the amount of \$300.00.  
56  
57  
58  
59  
60

## Treatment Compliance

To enhance compliance, study participants will be given an information sheet to take home detailing the procedure to be followed in the case of a missed dose, and requesting that this information be recorded for the investigators. The number of capsules and tablets remaining in each supply given to the patients will also be counted to evaluate treatment compliance. In cases where treatment compliance is poor, subjects will be excluded from the data analysis, using conventional criteria for defining adequate compliance in a clinical trial.

[Fig. 1, here]

## Psychiatric Assessment and Clinical Ratings

Patients will be evaluated and followed in the outpatient clinics at LIBR or Oklahoma University School of Community Medicine in Tulsa, OK, or at the University of Kansas Medical Center Research Institute (KUMCRI) in Wichita, KS. The diagnosis of BD will be established using DSM-IV-TR criteria on the basis of an unstructured interview conducted by a psychiatrist and the MINI-Plus administered by trained psychiatric interviewers. The following rating scales will be administered: MADRS, Quick Inventory of Depressive Symptomatology (QUIDS; 16 item), Hamilton Anxiety Rating Scale (HAM-A), Young Mania Rating Scale (YMRS), Universal Fagerstrom (to assess nicotine use), Hollingshead socioeconomic scale, Sheehan Disability Scale (SDS) and the Family Interview for Genetic Studies (FIGS). Medical assessment will include a physical examination, electrocardiogram, complete blood count (CBC), electrolytes and liver-function assays (SMA 20), thyroid panel, and urinalysis, serum drug and pregnancy tests at study entry and study completion. At each follow-up session, the MADRS, HAM-A, YMRS, and Clinical Global Impressions (CGI) scale will be repeated. Physical and psychiatric symptoms will be evaluated and recorded in order to measure the side-effect profiles of minocycline and aspirin. Participants will be questioned about adverse reactions, including dizziness, photosensitivity, hyperpigmentation, gastrointestinal

1  
2  
3 distress or bleeding at each assessment and will be withdrawn from the study if medically  
4 necessary. Vital signs will be measured at entry and at each session.  
5  
6  
7

### 8 9 **Immune System Measures**

10  
11  
12 The activity of peripheral cytokines correlates with inflammatory processes in the CNS.  
13 Peripheral cytokines cross the BBB, and can propagate signals across the BBB in the  
14 form of small, freely diffusible lipophilic molecules such as prostaglandins, which induce  
15 the production of cytokines from glia<sup>76</sup>. The measurement of peripheral markers of  
16 inflammation thus serves as a valid, if indirect assessment of CNS inflammation.  
17  
18  
19  
20  
21

22  
23 To explore predictors and correlates of treatment outcome, blood will be sampled for  
24 testing plasma and whole blood peripheral blood monocyte (PBM) based markers of  
25 inflammation at baseline and study end. These markers will include 10 cytokine proteins  
26 (IL-1 $\beta$ , IL-2, IL-4, IL-5, IL-6, IL-8, IL-10, IL-12p70, IFN $\gamma$ , and TNF, high sensitivity  
27 (hs) CRP, and RNA expression of candidate genes from PBMCs. Candidate genes  
28 include IL-6, TNF, and IRF5 ( a factor that mediates monocyte polarization). The 10  
29 inflammation-related cytokines and the PBMC mRNA will be assayed from plasma at  
30 baseline and study end. We selected the markers IL-6, TNF and CRP because they are the  
31 most widely implicated in mood disorders. The other cytokines included in the cytokine  
32 bead array assays are measured simultaneously with IL-6 and have all been implicated in  
33 the general regulation of inflammation. A meta-analysis of >100 studies found that IL-6  
34 and CRP each were significantly elevated in depressed patients with standardized mean  
35 difference scores (d) of 0.71 and 0.26, respectively<sup>77</sup>. The associations remained  
36 significant after adjustment for body-mass index (BMI) and smoking. Moreover, IL-6 has  
37 been shown to modulate HPA axis function by inducing CRH release,  
38 adrenocorticotrophic hormone synthesis, and corticosteroid production<sup>78</sup>. CRP production  
39 is induced by the proinflammatory cytokines, IL-1, IL-6, and IL-17, and is thus a non-  
40 specific marker of systemic inflammation.  
41  
42  
43  
44  
45  
46  
47  
48  
49  
50  
51  
52  
53  
54  
55  
56  
57  
58  
59  
60

1  
2  
3  
4  
5  
6  
7  
8  
9  
10  
11  
12  
13  
14  
15  
16  
17  
18  
19  
20  
21  
22  
23  
24  
25  
26  
27  
28  
29  
30  
31  
32  
33  
34  
35  
36  
37  
38  
39  
40  
41  
42  
43  
44  
45  
46  
47  
48  
49  
50  
51  
52  
53  
54  
55  
56  
57  
58  
59  
60

Three blood samples will be transported to the immunology lab in the Department of Surgery at the University of Oklahoma College of Medicine for each participant at each of the sampling time-points (sessions 1 and 7). One sample will be centrifuged to obtain plasma which will be stored at  $-80^{\circ}\text{C}$  until analyzed. Serum CRP, IL-6, TNF, and the other cytokines listed above will be assayed in duplicate with ELISA (CRP high-sensitivity kit, R & D Systems, Oxford, UK) or enhanced cytokine bead array flex kits (Becton Dickinson) using the manufacturer's reagents and standards. The other two samples will be used to isolate PBMCs and plasma and will be frozen until processed. Monocytes will be isolated from the PBMCs in order to assess mRNA levels similar to the method used by Padmos et al.<sup>32</sup>. This procedure utilizes monoclonal antibodies directed against human CD14 to isolate monocytes in peripheral blood monocyte cell suspensions. A magnetic cell sorting system will be used for the separation of the monocytes and flow cytometry will be used to gauge the purity of the population. Once purity is established, total RNA will be isolated from the monocytes using an RNeasy kits (Qiagen) according to the manufacturer's directions. RNA will then be reverse transcribed to cDNA using standard commercial kits. rtPCR reactions will be performed using the Dynamo Sybr Green HS Master Mix (New England Biolabs) and custom primers will be synthesized by a commercial laboratory. Real-time rtPCR reactions will be run using a Cepheid Smart Cycler II or similar instrument. Additional aliquots of serum and plasma will be stored so that other inflammatory markers can be tested in the future using Luminex bead arrays and/or additional available technologies.

### Source of Compounds Tested

Minocycline and aspirin are available on a generic basis, and are manufactured within the USA by several companies. The identity of the active medicines and placebos will be blinded using placebos that match the appearance of the active drugs. The medications and placebos have been formulated by Wedgewood Pharmacy, Swedesboro, NJ. The study minocycline capsule and chewable aspirin tablet are identical in appearance to their corresponding placebos.

## Outcome Measures and Data Analysis

Antidepressant response will be evaluated by assessing changes in MADRS scores. The *a priori* hypothesis that minocycline and/or aspirin plus existing medication will exert greater antidepressant effects than placebo plus existing medication will be tested in an intent-to-treat analysis using last observation carried forward for study dropouts. A secondary analysis will be performed to assess clinical improvement only in the study completers. These analyses will be statistically assessed using a group (for the four treatment cells)-by-session (1 vs. 7) repeated measures analysis of variance (ANOVA). If the ANOVA statistic is significant, between- and within-group t tests will be used in planned comparisons to identify the nature of the effect leading to the significant overall ANOVA statistic. We expect to find a significant group-by-session interaction, attributable to a greater reduction in MADRS scores in the minocycline and aspirin groups compared to the placebo group between session 1 and session 7.

In order to test whether the putative antidepressant effects of minocycline or aspirin have a rapid onset, as a *post hoc* analysis the ANOVA will be repeated using MADRS ratings from the assessment that follows the first week of exposure to active drug versus the corresponding change under placebo; i.e. session 2. *Post hoc* tests will be performed to assess the significance of changes in the secondary clinical outcome measures (QUIDS 16, HAM-A, YMRS, CGI-I). The rate of completion in the two cells also will be considered an outcome measure. The completion rate in the minocycline arm may be influenced more by dropouts due to side effects while the completion rate in the placebo group may be influenced more by dropouts due to non-response.

We will test the hypothesis that minocycline and aspirin reduce inflammation (e.g. CRP, IL-6, IL-6 mRNA) more than placebo using statistical analyses similar to those described above. If the assay results are normally distributed then a group-by-session repeated-measures ANOVA with CRP, IL-6 and nine other cytokine levels as dependent variables, and BMI, smoking status, and time of blood draw as covariates, will be used to assess anti-inflammatory effects of minocycline and aspirin. If the CRP or inflammatory

1  
2  
3 cytokine data are not normally distributed (Kolmogorov-Smirnov test) or if the equality  
4 of statistical variance assumption across assessments is violated (Levene's test), then  
5 Friedman's ANOVA will be used to test for CRP or inflammatory cytokine differences  
6 between groups. If the Friedman's ANOVA statistic is significant, Wilcoxon sign-ranked  
7 tests will be used for post-hoc analysis of group differences. Nonspecific factors that  
8 influence CRP and inflammatory cytokine levels include time of day, presence of  
9 infection, treatment with anti-inflammatory medications, smoking, obesity, and alcohol  
10 abuse. We will attempt to control for these potential confounds by measuring BMI and  
11 recording NSAID and nicotine use (Universal Fagerstrom scale), and by excluding  
12 individuals who have recently abused substances or who have intercurrent infections. The  
13 serum CRP concentration shows minimal diurnal variability in adults<sup>79</sup> but IL-6 and other  
14 cytokine levels vary across time of day<sup>80</sup>. To minimize cytokine measurement variability  
15 due to circadian fluctuations, we will schedule patient assessment sessions at the same  
16 time each day. Since this may not always be possible, we will record the time of day that  
17 each blood-draw is made, divide the day into quartiles: 7am-10am, 10am-12pm; 12pm-  
18 3pm, and 3pm-6pm, and use these data as a covariate in the statistical analyses.  
19  
20  
21  
22  
23  
24  
25  
26  
27  
28  
29  
30  
31  
32

33 To test whether baseline levels of CRP and inflammatory cytokines predict response to  
34 minocycline or aspirin, we will subclassify the participants using conventional criteria<sup>81</sup>  
35 as achieving full response ( $\geq 50\%$  reduction in MADRS score from baseline), partial  
36 response ( $< 50\%$  but  $\geq 25\%$  reduction), or nonresponse ( $< 25\%$  reduction). Patients  
37 achieving remission (post-treatment MADRS score  $\leq 10$ ) will also be identified. A non-  
38 parametric alternative to the ANOVA statistic, the Mann-Whitney test, will be used to  
39 compare remitted and non-remitted groups in baseline levels of inflammatory cytokines  
40 and CRP if the data are not normally distributed.  
41  
42  
43  
44  
45  
46  
47  
48

### 49 **Statistical Power**

50  
51  
52  
53 A recent meta-analysis of 96 antidepressant treatment studies found that the average  
54 effect size of a placebo treatment is 1.69 compared with 2.50 for an antidepressant  
55 treatment<sup>82</sup>. We calculated that in order to detect a difference in-group means of 0.81  
56  
57  
58  
59  
60

1  
2  
3 (2.50-1.69) with an 80% probability (2-sided test,  $\alpha=0.05$ ), we will require a sample size  
4 of 26 subjects per group ([http://hedwig.mgh.harvard.edu/sample\\_size/size.html](http://hedwig.mgh.harvard.edu/sample_size/size.html)). Thus  
5 given our sample size of 30 per group we should have sufficient power to test Specific  
6  
7 Aim 1, allowing for a 13% drop-out rate.  
8  
9

10  
11  
12 As discussed above, a recent meta-analysis<sup>77</sup> of cross-sectional studies of serum-derived  
13 IL-6 and CRP in depression calculated effect sizes of 0.71 for IL-6 and 0.26 for CRP.  
14 Based on these effect sizes a sample size of 26 would yield >80% probability of detecting  
15 significant depression-related changes in IL-6, but only a 60% probability of detecting a  
16 depression-related change in CRP. There are 3 reasons why we believe that these CRP  
17 power estimations are not applicable to this study. Firstly, the effect sizes derived from  
18 the meta-analysis are based on cross-sectional studies. Given the effect of variables such  
19 as smoking, diet, exercise, and BMI on proinflammatory cytokines, a within-subjects  
20 design is likely to reduce non-depression-related sources of variance, and substantially  
21 increase statistical power. Secondly, we are not only examining the effect of mood on IL-  
22 6 and CRP levels, but are treating patients with minocycline and aspirin, drugs known to  
23 possess anti-inflammatory properties. We therefore suggest that our proposed study is  
24 likely adequately powered to detect any true changes in plasma IL-6, CRP, and the other  
25 inflammatory cytokines across treatment blocks.  
26  
27  
28  
29  
30  
31  
32  
33  
34  
35  
36  
37

38  
39 Regarding IL-6 mRNA gene expression in peripheral blood monocytes, Padmos et al.<sup>32</sup>  
40 reported a 38-fold increase in IL-6 mRNA levels in unmedicated patients with BD  
41 compared with HC. Since minocycline reduces IL-6 levels (see above) we expect our  
42 study to have very high power to detect differences between groups, as well as changes in  
43 response to minocycline. The simultaneous detection of nine other inflammation-related  
44 cytokines, in addition to IL-6 (using newer more sensitive technology) will provide much  
45 finer resolution of the effects on inflammatory cascades than that measured in previous  
46  
47  
48  
49  
50  
51  
52  
53  
54  
55  
56  
57  
58  
59  
60

## ETHICS AND DISSEMINATION



## Gender/Minority/Pediatric Inclusion for Research

Women and Minorities will be included in the study without prejudice according to their representation in the study population. Participants will be recruited from the greater metropolitan areas of Tulsa, OK and Wichita, KS and efforts will be made to ensure that our subject population resembles the gender, ethnic and racial composition of these areas.

## Exclusion Criteria

The following exclusion criteria apply: 1) inability to provide informed consent; 2) age of onset of BD > 40 years; 3) serious risk of suicide; 4) current delusions or hallucinations sufficient to interfere with the capacity to provide informed consent; 5) current manic symptoms [depressed BD patients with concurrent manic symptoms have been found to be more likely to experience adverse reactions in antidepressant treatment trials<sup>83</sup>]; 6) medical illness including as hepatic impairment, renal dysfunction, bleeding diatheses (e.g., hemophilia), cerebrovascular disease or heart disease, hypertension that is inadequately controlled by medication, diabetes mellitus, or known peptic ulcer disease; 7) abuse of drugs or alcohol within the preceding 6 months, or substance dependence within the last 5 years; 8) daily alcoholic beverage consumption equivalent to  $\geq 3$  oz. of alcohol; 9) asthma or known allergies or hypersensitivities to tetracycline antibiotics, aspirin or other NSAIDs; 10) current use of drugs that could increase the risks associated with aspirin or minocycline administration, namely other antibiotic medications, other NSAIDs or anticoagulants (e.g., warfarin), acetazolamide, or methotrexate; 11) known HIV or other chronic infection including, but not limited to viral hepatitis. 12) Pregnant or nursing women, and women who are attempting to conceive during the 6 week study period, will also be excluded.

## Specimens, Records, and Data Collection

A physician, registered nurse, or trained phlebotomist will utilize a sterile technique to draw 60 ml of blood by venipuncture. Participants will also be asked to submit a urine



1  
2  
3 sample. A physician, registered nurse, or trained technician will collect EKG data from  
4  
5 the subject in a private exam room.  
6  
7

### 8 9 **Recruitment and Consent Procedure**

10  
11  
12 Volunteers will be recruited from the community as well as from the clinical services at  
13 the Laureate Psychiatric Clinic and Hospital and the Oklahoma University School of  
14 Community Medicine in Tulsa, OK, and from the clinical services affiliated with the  
15 KUMCRI. Volunteers may be referred from sources that include physicians, newspaper  
16 advertising, self-help organizations, self-referral, and WIRB approved flyers posted at  
17 local universities, schools, churches and grocery stores. Participants may be pre-screened  
18 through screening protocols based at LIBR or KUCRI. We plan to recruit a total of 120  
19 participants.  
20  
21  
22  
23  
24  
25  
26

27  
28 All participant interactions including consenting will be conducted in private interview /  
29 exam rooms. These rooms are secured from public areas via combination locked doors  
30 that are only accessible to authorized personnel. Prospective participants will receive an  
31 explanation of the objectives, procedures, and hazards of this protocol that is appropriate  
32 to their level of understanding. The right of the subject to decline to participate or to  
33 withdraw from the study at any time will be made clear.  
34  
35  
36  
37  
38  
39

40 Non-English speaking participants will not be recruited.  
41  
42

43  
44 After the consent form is verbally explained to the participant, and any questions have  
45 been answered, the researcher will leave the room to allow the participant to read the  
46 consent form thoroughly. Family members will be allowed to be present and to discuss  
47 the consenting process with the participant. After the consent is read, the researcher will  
48 return and answer any additional questions the participant may have. The researcher will  
49 remind the subject that participation is strictly voluntary and that they have the right to  
50 withdraw at any time. Participants will be asked to arrive 30 minutes early in order to  
51 have sufficient time for the consenting process.  
52  
53  
54  
55  
56  
57  
58  
59  
60

## Subject Risks

The risks of behavioral testing are minimal. The risks of blood drawing are also minimal. Possible mild side effects of the blood draw include mild pain or bruising at the site of the venipuncture.

Minocycline has been used a broad-spectrum antibiotic for many years in doses up to 400 mg/day<sup>34</sup>. It has been used on a chronic basis to treat acne and rheumatoid arthritis, often for many years, in hundreds of thousands of patients. The most commonly encountered side effects are upset stomach, diarrhea, dizziness, drowsiness, ataxia, vertigo, headache and vomiting. Prolonged use can be associated with pigmentation of the skin, gums or teeth. Between 1975 and 2006, the World Health Organization Collaborating Center for International Drug Monitoring listed 122 cases of adverse drug reactions to intravenous minocycline; most commonly, abnormal hepatic function and thrombocytopenia<sup>34</sup>. These included cases of serious liver injury, including irreversible drug-induced hepatitis and fulminant hepatic failure that was fatal in two cases, thought to be due to triggering or unmasking autoimmune hepatitis. One case of autoimmune-related glomerulonephritis has been reported. The role of oral minocycline in precipitating these conditions has not been clearly established. Minocycline also has been associated with idiopathic intracranial hypertension (pseudotumor cerebri). Long-term trials have shown that minocycline is well tolerated. In a 2-year trial of minocycline (200 mg/day) for RA, 3 of 30 patients withdrew due to finger-nail discoloration, dizziness, or erythematous rash<sup>53</sup>. Of 11 patients with HD treated with minocycline (100 mg/day) for 2 years, one complained of nausea in the first 3 weeks, and two of sedation<sup>52</sup>, while in a 6-month trial of minocycline for ALS, the mean tolerated dose was 387 mg/day and the most common adverse effects were gastrointestinal<sup>84</sup>. Five of 36 patients with schizophrenia withdrew from a 6-month trial of minocycline (200 mg/day) due to indigestion (n=2), pigmentation (n=2), or a suicide attempt (n=1)<sup>57</sup>.

1  
2  
3  
4  
5  
6  
7  
8  
9  
10  
11  
12  
13  
14  
15  
16  
17  
18  
19  
20  
21  
22  
23  
24  
25  
26  
27  
28  
29  
30  
31  
32  
33  
34  
35  
36  
37  
38  
39  
40  
41  
42  
43  
44  
45  
46  
47  
48  
49  
50  
51  
52

Low dose aspirin has been safely used in many millions of patients on a worldwide scale for its role as an anti-thrombotic and thrombolytic. A meta-analysis of >100 randomized trials in high-risk patients indicated that low-dose ASA reduced cardiovascular death by 15% and prevented nonfatal vascular events by about 30%<sup>85</sup>. These data stand in striking contrast to the data obtained in COX-2 inhibitors, which can increase cardiovascular risk. In clinical trials of several COX-2 selective and nonselective NSAIDs of up to three years duration have shown an increased risk of serious cardiovascular (CV) thrombotic events, myocardial infarction, and stroke, which have in many cases been fatal<sup>86</sup>. Patients with known CV disease or risk factors for CV disease are at greater risk for such events during chronic treatment with COX-2 inhibitors. Evidence from human pharmacology and genetics, genetically manipulated rodents, and other animal models and randomized trials indicates that this is consequent to suppression of COX-2-dependent cardioprotective prostaglandins, particularly prostacyclin<sup>87</sup>.

28  
29  
30  
31  
32  
33  
34  
35  
36  
37  
38  
39  
40  
41  
42  
43  
44  
45  
46  
47  
48  
49  
50  
51  
52

Aspirin does not cause a generalized bleeding abnormality unless given to patients with an underlying hemostatic defect (e.g., hemophilia, uremia, or that induced by anticoagulant therapy). Aspirin-induced impairment of primary hemostasis cannot be separated from its antithrombotic effect and is similar at all doses  $\geq 75$  mg/d<sup>88</sup>. The risk of intracranial bleeding is exceedingly rare (<0.1% in high risk populations), but is higher in individuals with cerebrovascular disease<sup>85</sup>. Hypertension that is inadequately controlled by medication often is considered a contraindication to aspirin because of the concern that possible benefits in the prevention of cardiovascular events may be counterbalanced by an increased risk of cerebral bleeding. However, hypertensive patients whose blood pressure is well-controlled appear protected from myocardial infarction by aspirin therapy without an increase in the number of cerebral hemorrhages or strokes<sup>89</sup>. Moreover, aspirin therapy does not affect blood pressure or the response of hypertension to antihypertensive agents<sup>88 90</sup>.

53  
54  
55  
56  
57  
58  
59  
60

NSAIDs as a class can cause serious gastrointestinal (GI) adverse events including inflammation, bleeding, ulceration, and perforation of the stomach, small intestine, or large intestine, which rarely have proven fatal. In controlled clinical trials the percentage

1  
2  
3 of patients reporting one or more gastrointestinal complaints has ranged from 4% to  
4 16%<sup>88</sup>. The mechanism underlying this adverse effect appears attributable to the  
5 inhibition of COX-1. Thus, the incidence of GI side effects has been higher for NSAIDs  
6 with more potent effects at COX-1, such as aspirin and indomethacin. For example, in  
7 controlled trials the incidence of GI side effects for aspirin and indomethacin have been  
8 about twice as high as that for ibuprofen, a nonselective COX inhibitor, in equally  
9 effective doses for arthritis. Nevertheless, the incidence of GI side effects associated with  
10 aspirin is dose-dependent, and thus is markedly lower when using aspirin in the low dose  
11 range planned for the current study. Notably, the risk of GI bleeding is not reduced by  
12 using the enterically coated aspirin formulations, but is thought to be lower during  
13 concomitant use of omeprazole<sup>88</sup>. The effects of warfarin and NSAIDs on GI bleeding are  
14 synergistic, such that the users of both drugs together have a risk of serious GI bleeding  
15 higher than users of either drug alone. Fortunately, the risk of GI bleeding, which reflects  
16 the inhibition of prostaglandins in the stomach (from systemic rather than local exposure)  
17 is much smaller when using low-dose as opposed to high-dose aspirin.  
18  
19  
20  
21  
22  
23  
24  
25  
26  
27  
28  
29  
30  
31

32 Low-dose aspirin has not been reported to alter renal function, and does not reduce  
33 effectiveness of ACE inhibitors for HTN (in contrast to other NSAIDs)<sup>90 91</sup>. However,  
34 aspirin can inhibit the renal clearance of acetazolamide and methotrexate potentially  
35 leading to increased blood concentrations of and toxicity from these agents. Salicylate  
36 can displace other drugs which are protein-bound, especially phenytoin and valproic acid,  
37 increasing their free drug concentrations in plasma. This may increase side effects,  
38 toxicity and/or efficacy for displaced drugs. If the BD subjects are currently receiving  
39 valproic acid preparations (e.g., divalproex) then the plasma levels of these agents will be  
40 monitored for potential changes.  
41  
42  
43  
44  
45  
46  
47  
48

49 Aspirin may cause a severe allergic reaction that may include: hives, asthma (wheezing),  
50 facial swelling, shock. Aspirin overdose can be fatal at 30 g or higher.  
51  
52  
53  
54

### 55 **PHI Protection**

56  
57  
58  
59  
60

Paper copies of consents, screening forms, the Research Privacy Form, and any other forms, testing results or papers containing Protected Health Information (PHI) will be stored in a secured medical records room with access granted only to authorized personnel.

Electronic data that contain PHI will be managed in accordance with ISO 27000 series information security standards with policies developed from current NIST guidelines (SP 800-66) for HIPAA and HITECH compliance. Specific controls implemented to protect PHI are derived from NIST 800-122, and include (but not limited to):

- 1) Access Enforcement (AC-3) – Individual user accounts, role based access control, access control lists;
- 2) Separation of Duties (AC-5) – de-identification of data as appropriate, acquire/analyze/manage firewall;
- 3) Least Privilege (AC-6) – to ensure PHI data is only available to persons with established need for access;
- 4) Remote Access (AC-17) – Secure VPN, encrypted end devices;
- 5) Access Control for Mobile Devices (AC-19) – Password login, remote destruction capabilities;
- 6) Auditable Events (AU-2) + Monitoring: Log detailed server and network information, alert for problems;
- 7) Analysis, and Reporting (AU-6) – Procedures to audit system records for inappropriate activity.
- 8) User Identification and Authentication (IA-2) – username/secure password and two factor authentication will be required when appropriate.
- 9) Media Access, Marking, Storage, and Transport (MP-2,3,4,5) – Records will be asset tagged and marked to their PHI status, PHI data will be secured and managed by professional system administrators, and will be transported via encryption (VPN, USB, File);
- 10) Media Sanitization (MP-6) – Data will be destroyed by SFHS in accordance with their policies and procedures;

1  
2  
3 11) Transmission Confidentiality (SC-9) – Encryption will be used when needed for  
4 all avenues of data transmission (wireless, network, etc.).  
5  
6

7 To protect subject confidentiality, blood samples will be anonymized as follows:

- 8  
9 1. Last name: All participants will be assigned the last name “LIBR.”  
10  
11 2. First name: The first name will be a secure alpha cryptographic hash based on  
12 LIBR user ID. This technique is the gold standard in computer security for one-  
13 way correlation of data.  
14  
15

### 16 17 18 **Benefits versus Risks**

19  
20  
21 The participant may benefit from participation if either study drug produces an  
22 antidepressant effect. Participants will also receive a free clinical evaluation; more  
23 frequent treatment visits than are typical in practice, diligent follow-up in terms of  
24 symptoms and side effects, and physical and psychiatric monitoring during the study. The  
25 risks of delaying alternative treatments are minimal in relation to the potential long-term  
26 benefits to the subjects and the importance of knowledge that may reasonably result. The  
27 importance of the knowledge that will likely be gained from this study clearly exceeds  
28 the associated potential risks.  
29  
30  
31  
32  
33  
34  
35  
36  
37

### 38 **Alternative Treatment**

39  
40  
41 It is possible that some patients may feel better with talk therapy. Participating in any  
42 type of talk therapy with their psychiatrist or psychologist does not require dropping out  
43 of this study. Subjects will be encouraged to contact the study investigators, particularly  
44 the physician in the study, with any questions they may have regarding alternatives to  
45 treatment through this research study. The study investigators will assist in referring the  
46 subject to another physician for treatment after their participation in the study has ended.  
47 Physical and psychological testing, blood draws, urine samples, and EKG data provide no  
48 known risks to persons other than those listed in the exclusion criteria whereas the  
49 combinatory power of these measures may provide information relevant to understanding  
50 the pathophysiology of bipolar disorder.  
51  
52  
53  
54  
55  
56  
57  
58  
59  
60

## Data and Safety Monitoring Plan

This study involves more than minimal risk. The study progress will be overseen by a Data, Safety and Monitoring Board (DSMB). The DSMB is composed of three members who will meet in person or per telephone at least once every 6 months to review relevant study data including adverse events and dropout rates.

Any unanticipated adverse events will be reported immediately to the IRB of record and to the LIBR Human Protection Administrator. Any adverse events will be included in the annual IRB report.

## Dissemination of Results

The study results will be presented at national and/or international biomedical scientific meetings and published in peer-reviewed journals.

## REGISTRATION

In accordance with the recommendations of the International Committee of Medical Journal Editors<sup>92</sup>, the proposed trial is registered in a public registry ([www.clinicaltrials.gov](http://www.clinicaltrials.gov) Identifier: NCT01429272).

## Figure Legend

### **Figure 1: Schematic of Study Design**

*Legend: Each session number (total of 7) is encircled, with the timing between sessions indicated in weeks with a 2 business day window on either side of visit target date to complete the visit. Session 1 is the baseline (green star) and session 7 is the study end*

1  
2  
3  
4  
5  
6  
7  
8  
9  
10  
11  
12  
13  
14  
15  
16  
17  
18  
19  
20  
21  
22  
23  
24  
25  
26  
27  
28  
29  
30  
31  
32  
33  
34  
35  
36  
37  
38  
39  
40  
41  
42  
43  
44  
45  
46  
47  
48  
49  
50  
51  
52  
53  
54  
55  
56  
57  
58  
59  
60

(purple star). Peripheral blood will be sampled at baseline and study end to assay markers of inflammation. The study duration is 6 weeks.

### **Author Contributions**

The protocol was written by Drs. Savitz and W. Drevets and was critically reviewed by Drs. Preskorn, Teague, D. Drevets, and Yates.

### **Funding Statement**

This work was funded by the Stanley Medical Research Institute, grant number 10T-1401.

### **Competing Interests**

Wayne Drevets, M.D. has consulted for Johnson & Johnson, Pfizer, Rules-Based Medicine, and Eisai. None of the other authors have conflicts of interest to declare.



## References

1. Correa R, Akiskal H, Gilmer W, Nierenberg AA, Trivedi M, Zisook S. Is unrecognized bipolar disorder a frequent contributor to apparent treatment resistant depression? *J Affect Disord* 2010;127(1-3):10-8.
2. Tohen M, Vieta E, Calabrese J, Ketter TA, Sachs G, Bowden C, et al. Efficacy of olanzapine and olanzapine-fluoxetine combination in the treatment of bipolar I depression. *Arch Gen Psychiatry* 2003;60(11):1079-88.
3. Nierenberg AA, Ostacher MJ, Calabrese JR, Ketter TA, Marangell LB, Miklowitz DJ, et al. Treatment-resistant bipolar depression: a STEP-BD equipoise randomized effectiveness trial of antidepressant augmentation with lamotrigine, inositol, or risperidone. *Am J Psychiatry* 2006;163(2):210-6.
4. Nemeroff CB, Evans DL, Gyulai L, Sachs GS, Bowden CL, Gergel IP, et al. Double-blind, placebo-controlled comparison of imipramine and paroxetine in the treatment of bipolar depression. *Am J Psychiatry* 2001;158(6):906-12.
5. Mallinger AG, Frank E, Thase ME, Barwell MM, Diazgranados N, Luckenbaugh DA, et al. Revisiting the effectiveness of standard antidepressants in bipolar disorder: are monoamine oxidase inhibitors superior? *Psychopharmacol Bull* 2009;42(2):64-74.
6. Himmelhoch JM, Thase ME, Mallinger AG, Houck P. Tranylcypromine versus imipramine in anergic bipolar depression. *Am J Psychiatry* 1991;148(7):910-6.
7. Thase ME, Mallinger AG, McKnight D, Himmelhoch JM. Treatment of imipramine-resistant recurrent depression, IV: A double-blind crossover study of tranylcypromine for anergic bipolar depression. *Am J Psychiatry* 1992;149(2):195-8.
8. Savitz J, Drevets WC. Bipolar and major depressive disorder: neuroimaging the developmental-degenerative divide. *Neurosci Biobehav Rev* 2009;33(5):699-771.
9. Savitz JB, Drevets WC. Imaging phenotypes of major depressive disorder: genetic correlates. *Neuroscience* 2009;164(1):300-30.
10. Wang Y, Qin ZH. Molecular and cellular mechanisms of excitotoxic neuronal death. *Apoptosis* 2010;15(11):1382-402.
11. Mitchell ND, Baker GB. An update on the role of glutamate in the pathophysiology of depression. *Acta Psychiatr Scand* 2010;122(3):192-210.
12. Ryan B, Musazzi L, Mallei A, Tardito D, Gruber SH, El Khoury A, et al. Remodelling by early-life stress of NMDA receptor-dependent synaptic plasticity in a

- 1  
2  
3 gene-environment rat model of depression. *Int J Neuropsychopharmacol*  
4 2009;12(4):553-9.  
5  
6 13. Boyce-Rustay JM, Holmes A. Genetic inactivation of the NMDA receptor NR2A  
7 subunit has anxiolytic- and antidepressant-like effects in mice.  
8 *Neuropsychopharmacology* 2006;31(11):2405-14.  
9  
10 14. Tsunoka T, Kishi T, Ikeda M, Kitajima T, Yamanouchi Y, Kinoshita Y, et al.  
11 Association analysis of group II metabotropic glutamate receptor genes  
12 (GRM2 and GRM3) with mood disorders and fluvoxamine response in a  
13 Japanese population. *Prog Neuropsychopharmacol Biol Psychiatry*  
14 2009;33(5):875-9.  
15  
16 15. Diazgranados N, Ibrahim L, Brutsche NE, Newberg A, Kronstein P, Khalife S, et al.  
17 A randomized add-on trial of an N-methyl-D-aspartate antagonist in  
18 treatment-resistant bipolar depression. *Arch Gen Psychiatry* 2010;67(8):793-  
19 802.  
20  
21 16. Zarate CA, Jr., Payne JL, Quiroz J, Sporn J, Denicoff KK, Luckenbaugh D, et al. An  
22 open-label trial of riluzole in patients with treatment-resistant major  
23 depression. *Am J Psychiatry* 2004;161(1):171-4.  
24  
25 17. Dowlati Y, Herrmann N, Swardfager W, Liu H, Sham L, Reim EK, et al. A meta-  
26 analysis of cytokines in major depression. *Biol Psychiatry* 2010;67(5):446-57.  
27  
28 18. Pace TW, Miller AH. Cytokines and glucocorticoid receptor signaling. Relevance  
29 to major depression. *Ann N Y Acad Sci* 2009;1179:86-105.  
30  
31 19. Maes M, Scharpe S, Van Grootel L, Uyttenbroeck W, Cooreman W, Cosyns P, et al.  
32 Higher alpha 1-antitrypsin, haptoglobin, ceruloplasmin and lower retinol  
33 binding protein plasma levels during depression: further evidence for the  
34 existence of an inflammatory response during that illness. *J Affect Disord*  
35 1992;24(3):183-92.  
36  
37 20. Motivala SJ, Sarfatti A, Olmos L, Irwin MR. Inflammatory markers and sleep  
38 disturbance in major depression. *Psychosom Med* 2005;67(2):187-94.  
39  
40 21. Song C, Dinan T, Leonard BE. Changes in immunoglobulin, complement and  
41 acute phase protein levels in the depressed patients and normal controls. *J*  
42 *Affect Disord* 1994;30(4):283-8.  
43  
44 22. Tying S, Gottlieb A, Papp K, Gordon K, Leonardi C, Wang A, et al. Etanercept and  
45 clinical outcomes, fatigue, and depression in psoriasis: double-blind placebo-  
46 controlled randomised phase III trial. *Lancet* 2006;367(9504):29-35.  
47  
48 23. Drexhage RC, Knijff EM, Padmos RC, Heul-Nieuwenhuijzen L, Beumer W, Versnel  
49 MA, et al. The mononuclear phagocyte system and its cytokine inflammatory  
50 networks in schizophrenia and bipolar disorder. *Expert Rev Neurother*  
51 2010;10(1):59-76.  
52  
53 24. Leonard BE. The immune system, depression and the action of antidepressants.  
54 *Prog Neuropsychopharmacol Biol Psychiatry* 2001;25(4):767-80.  
55  
56 25. Dantzer R, O'Connor JC, Freund GG, Johnson RW, Kelley KW. From inflammation  
57 to sickness and depression: when the immune system subjugates the brain.  
58 *Nat Rev Neurosci* 2008;9(1):46-56.  
59  
60 26. Maes M. Depression is an inflammatory disease, but cell-mediated immune  
activation is the key component of depression. *Prog Neuropsychopharmacol*  
*Biol Psychiatry* 2010.

- 1  
2  
3  
4  
5  
6  
7  
8  
9  
10  
11  
12  
13  
14  
15  
16  
17  
18  
19  
20  
21  
22  
23  
24  
25  
26  
27  
28  
29  
30  
31  
32  
33  
34  
35  
36  
37  
38  
39  
40  
41  
42  
43  
44  
45  
46  
47  
48  
49  
50  
51  
52  
53  
54  
55  
56  
57  
58  
59  
60
27. Miller AH, Maletic V, Raison CL. Inflammation and its discontents: the role of cytokines in the pathophysiology of major depression. *Biol Psychiatry* 2009;65(9):732-41.
  28. Pariante CM, Pearce BD, Pisell TL, Sanchez CI, Po C, Su C, et al. The proinflammatory cytokine, interleukin-1alpha, reduces glucocorticoid receptor translocation and function. *Endocrinology* 1999;140(9):4359-66.
  29. Ongur D, Drevets WC, Price JL. Glial reduction in the subgenual prefrontal cortex in mood disorders. *Proc Natl Acad Sci U S A* 1998;95(22):13290-5.
  30. Raison CL, Dantzer R, Kelley KW, Lawson MA, Woolwine BJ, Vogt G, et al. CSF concentrations of brain tryptophan and kynurenines during immune stimulation with IFN-alpha: relationship to CNS immune responses and depression. *Mol Psychiatry* 2010;15(4):393-403.
  31. Gabbay V, Klein RG, Katz Y, Mendoza S, Guttman LE, Alonso CM, et al. The possible role of the kynurenine pathway in adolescent depression with melancholic features. *J Child Psychol Psychiatry* 2010;51(8):935-43.
  32. Padmos RC, Hillegers MH, Knijff EM, Vonk R, Bouvy A, Staal FJ, et al. A discriminating messenger RNA signature for bipolar disorder formed by an aberrant expression of inflammatory genes in monocytes. *Arch Gen Psychiatry* 2008;65(4):395-407.
  33. Zemke D, Majid A. The potential of minocycline for neuroprotection in human neurologic disease. *Clin Neuropharmacol* 2004;27(6):293-8.
  34. Elewa HF, Hilali H, Hess DC, Machado LS, Fagan SC. Minocycline for short-term neuroprotection. *Pharmacotherapy* 2006;26(4):515-21.
  35. Hailer NP. Immunosuppression after traumatic or ischemic CNS damage: it is neuroprotective and illuminates the role of microglial cells. *Prog Neurobiol* 2008;84(3):211-33.
  36. Pae CU, Marks DM, Han C, Patkar AA. Does minocycline have antidepressant effect? *Biomed Pharmacother* 2008;62(5):308-11.
  37. Wang J, Wei Q, Wang CY, Hill WD, Hess DC, Dong Z. Minocycline up-regulates Bcl-2 and protects against cell death in mitochondria. *J Biol Chem* 2004;279(19):19948-54.
  38. Chen G, Zeng WZ, Yuan PX, Huang LD, Jiang YM, Zhao ZH, et al. The mood-stabilizing agents lithium and valproate robustly increase the levels of the neuroprotective protein bcl-2 in the CNS. *J Neurochem* 1999;72(2):879-82.
  39. Kosten TA, Galloway MP, Duman RS, Russell DS, D'Sa C. Repeated unpredictable stress and antidepressants differentially regulate expression of the bcl-2 family of apoptotic genes in rat cortical, hippocampal, and limbic brain structures. *Neuropsychopharmacology* 2008;33(7):1545-58.
  40. Youle RJ, Strasser A. The BCL-2 protein family: opposing activities that mediate cell death. *Nat Rev Mol Cell Biol* 2008;9(1):47-59.
  41. Tikka T, Fiebich BL, Goldsteins G, Keinanen R, Koistinaho J. Minocycline, a tetracycline derivative, is neuroprotective against excitotoxicity by inhibiting activation and proliferation of microglia. *J Neurosci* 2001;21(8):2580-8.
  42. Cornet S, Spinnewyn B, Delaflotte S, Charnet C, Roubert V, Favre C, et al. Lack of evidence of direct mitochondrial involvement in the neuroprotective effect of minocycline. *Eur J Pharmacol* 2004;505(1-3):111-9.

- 1  
2  
3  
4 43. Yrjanheikki J, Keinanen R, Pellikka M, Hokfelt T, Koistinaho J. Tetracyclines  
5 inhibit microglial activation and are neuroprotective in global brain ischemia.  
6 *Proc Natl Acad Sci U S A* 1998;95(26):15769-74.
- 7 44. Sanchez Mejia RO, Ona VO, Li M, Friedlander RM. Minocycline reduces traumatic  
8 brain injury-mediated caspase-1 activation, tissue damage, and neurological  
9 dysfunction. *Neurosurgery* 2001;48(6):1393-9; discussion 99-401.
- 10 45. Bilousova TV, Dansie L, Ngo M, Aye J, Charles JR, Ethell DW, et al. Minocycline  
11 promotes dendritic spine maturation and improves behavioural performance  
12 in the fragile X mouse model. *J Med Genet* 2009;46(2):94-102.
- 13 46. Stirling DP, Khodarahmi K, Liu J, McPhail LT, McBride CB, Steeves JD, et al.  
14 Minocycline treatment reduces delayed oligodendrocyte death, attenuates  
15 axonal dieback, and improves functional outcome after spinal cord injury. *J*  
16 *Neurosci* 2004;24(9):2182-90.
- 17 47. Zhang L, Shirayama Y, Shimizu E, Iyo M, Hashimoto K. Protective effects of  
18 minocycline on 3,4-methylenedioxymethamphetamine-induced  
19 neurotoxicity in serotonergic and dopaminergic neurons of mouse brain. *Eur*  
20 *J Pharmacol* 2006;544(1-3):1-9.
- 21 48. Greenwald RA, Moak SA, Ramamurthy NS, Golub LM. Tetracyclines suppress  
22 matrix metalloproteinase activity in adjuvant arthritis and in combination  
23 with flurbiprofen, ameliorate bone damage. *J Rheumatol* 1992;19(6):927-38.
- 24 49. Brundula V, Rewcastle NB, Metz LM, Bernard CC, Yong VW. Targeting leukocyte  
25 MMPs and transmigration: minocycline as a potential therapy for multiple  
26 sclerosis. *Brain* 2002;125(Pt 6):1297-308.
- 27 50. Zhu S, Stavrovskaya IG, Drozda M, Kim BY, Ona V, Li M, et al. Minocycline inhibits  
28 cytochrome c release and delays progression of amyotrophic lateral sclerosis  
29 in mice. *Nature* 2002;417(6884):74-8.
- 30 51. Wang X, Zhu S, Drozda M, Zhang W, Stavrovskaya IG, Cattaneo E, et al.  
31 Minocycline inhibits caspase-independent and -dependent mitochondrial cell  
32 death pathways in models of Huntington's disease. *Proc Natl Acad Sci U S A*  
33 2003;100(18):10483-7.
- 34 52. Bonelli RM, Hodl AK, Hofmann P, Kapfhammer HP. Neuroprotection in  
35 Huntington's disease: a 2-year study on minocycline. *Int Clin*  
36 *Psychopharmacol* 2004;19(6):337-42.
- 37 53. O'Dell JR, Blakely KW, Mallek JA, Eckhoff PJ, Leff RD, Wees SJ, et al. Treatment of  
38 early seropositive rheumatoid arthritis: a two-year, double-blind comparison  
39 of minocycline and hydroxychloroquine. *Arthritis Rheum* 2001;44(10):2235-  
40 41.
- 41 54. Lampl Y, Boaz M, Gilad R, Lorberboym M, Dabby R, Rapoport A, et al. Minocycline  
42 treatment in acute stroke: an open-label, evaluator-blinded study. *Neurology*  
43 2007;69(14):1404-10.
- 44 55. Miyaoka T, Yasukawa R, Yasuda H, Hayashida M, Inagaki T, Horiguchi J. Possible  
45 antipsychotic effects of minocycline in patients with schizophrenia. *Prog*  
46 *Neuropsychopharmacol Biol Psychiatry* 2007;31(1):304-7.
- 47 56. Miyaoka T, Yasukawa R, Yasuda H, Hayashida M, Inagaki T, Horiguchi J.  
48 Minocycline as adjunctive therapy for schizophrenia: an open-label study.  
49 *Clin Neuropharmacol* 2008;31(5):287-92.
- 50  
51  
52  
53  
54  
55  
56  
57  
58  
59  
60

- 1  
2  
3  
4  
5  
6  
7  
8  
9  
10  
11  
12  
13  
14  
15  
16  
17  
18  
19  
20  
21  
22  
23  
24  
25  
26  
27  
28  
29  
30  
31  
32  
33  
34  
35  
36  
37  
38  
39  
40  
41  
42  
43  
44  
45  
46  
47  
48  
49  
50  
51  
52  
53  
54  
55  
56  
57  
58  
59  
60
57. Levkovitz Y, Mendlovich S, Riwkes S, Braw Y, Levkovitch-Verbin H, Gal G, et al. A double-blind, randomized study of minocycline for the treatment of negative and cognitive symptoms in early-phase schizophrenia. *J Clin Psychiatry* 2010;71(2):138-49.
58. Molina-Hernandez M, Tellez-Alcantara NP, Perez-Garcia J, Olivera-Lopez JI, Jaramillo-Jaimes MT. Antidepressant-like actions of minocycline combined with several glutamate antagonists. *Prog Neuropsychopharmacol Biol Psychiatry* 2008;32(2):380-6.
59. Molina-Hernandez M, Tellez-Alcantara NP, Perez-Garcia J, Olivera-Lopez JI, Jaramillo-Jaimes MT. Desipramine or glutamate antagonists synergized the antidepressant-like actions of intra-nucleus accumbens infusions of minocycline in male Wistar rats. *Prog Neuropsychopharmacol Biol Psychiatry* 2008;32(7):1660-6.
60. O'Connor JC, Lawson MA, Andre C, Moreau M, Lestage J, Castanon N, et al. Lipopolysaccharide-induced depressive-like behavior is mediated by indoleamine 2,3-dioxygenase activation in mice. *Mol Psychiatry* 2009;14(5):511-22.
61. Levine J, Cholestoy A, Zimmerman J. Possible antidepressant effect of minocycline. *Am J Psychiatry* 1996;153(4):582.
62. Cipollone F, Patrignani P, Greco A, Panara MR, Padovano R, Cuccurullo F, et al. Differential suppression of thromboxane biosynthesis by indobufen and aspirin in patients with unstable angina. *Circulation* 1997;96(4):1109-16.
63. Choi SH, Aid S, Bosetti F. The distinct roles of cyclooxygenase-1 and -2 in neuroinflammation: implications for translational research. *Trends Pharmacol Sci* 2009;30(4):174-81.
64. Choi SH, Aid S, Choi U, Bosetti F. Cyclooxygenases-1 and -2 differentially modulate leukocyte recruitment into the inflamed brain. *Pharmacogenomics J* 2010;10(5):448-57.
65. Choi SH, Bosetti F. Cyclooxygenase-1 null mice show reduced neuroinflammation in response to beta-amyloid. *Aging (Albany NY)* 2009;1(2):234-44.
66. Bosetti F, Weerasinghe GR, Rosenberger TA, Rapoport SI. Valproic acid down-regulates the conversion of arachidonic acid to eicosanoids via cyclooxygenase-1 and -2 in rat brain. *J Neurochem* 2003;85(3):690-6.
67. Weerasinghe GR, Rapoport SI, Bosetti F. The effect of chronic lithium on arachidonic acid release and metabolism in rat brain does not involve secretory phospholipase A2 or lipoxygenase/cytochrome P450 pathways. *Brain Res Bull* 2004;63(6):485-9.
68. Ramadan E, Basselin M, Rao JS, Chang L, Chen M, Ma K, et al. Lamotrigine blocks NMDA receptor-initiated arachidonic acid signalling in rat brain: implications for its efficacy in bipolar disorder. *Int J Neuropsychopharmacol* 2011:1-13.
69. Stolk P, Souverein PC, Wilting I, Leufkens HG, Klein DF, Rapoport SI, et al. Is aspirin useful in patients on lithium? A pharmacoepidemiological study related to bipolar disorder. *Prostaglandins Leukot Essent Fatty Acids* 2010;82(1):9-14.



- 1  
2  
3  
4  
5  
6  
7  
8  
9  
10  
11  
12  
13  
14  
15  
16  
17  
18  
19  
20  
21  
22  
23  
24  
25  
26  
27  
28  
29  
30  
31  
32  
33  
34  
35  
36  
37  
38  
39  
40  
41  
42  
43  
44  
45  
46  
47  
48  
49  
50  
51  
52  
53  
54  
55  
56  
57  
58  
59  
60
70. Phelan KM, Mosholder AD, Lu S. Lithium interaction with the cyclooxygenase 2 inhibitors rofecoxib and celecoxib and other nonsteroidal anti-inflammatory drugs. *J Clin Psychiatry* 2003;64(11):1328-34.
71. Mendlewicz J, Kriwin P, Oswald P, Souery D, Alboni S, Brunello N. Shortened onset of action of antidepressants in major depression using acetylsalicylic acid augmentation: a pilot open-label study. *Int Clin Psychopharmacol* 2006;21(4):227-31.
72. Ketterer MW, Brymer J, Rhoads K, Kraft P, Lovallo WR. Is aspirin, as used for antithrombosis, an emotion-modulating agent? *J Psychosom Res* 1996;40(1):53-8.
73. Nery FG, Monkul ES, Hatch JP, Fonseca M, Zunta-Soares GB, Frey BN, et al. Celecoxib as an adjunct in the treatment of depressive or mixed episodes of bipolar disorder: a double-blind, randomized, placebo-controlled study. *Hum Psychopharmacol* 2008;23(2):87-94.
74. Muller N, Schwarz MJ, Dehning S, Douhe A, Cerovecky A, Goldstein-Muller B, et al. The cyclooxygenase-2 inhibitor celecoxib has therapeutic effects in major depression: results of a double-blind, randomized, placebo controlled, add-on pilot study to reboxetine. *Mol Psychiatry* 2006;11(7):680-4.
75. Akhondzadeh S, Jafari S, Raisi F, Nasehi AA, Ghoreishi A, Salehi B, et al. Clinical trial of adjunctive celecoxib treatment in patients with major depression: a double blind and placebo controlled trial. *Depress Anxiety* 2009;26(7):607-11.
76. Maier SF. Bi-directional immune-brain communication: Implications for understanding stress, pain, and cognition. *Brain Behav Immun* 2003;17(2):69-85.
77. Howren MB, Lamkin DM, Suls J. Associations of depression with C-reactive protein, IL-1, and IL-6: a meta-analysis. *Psychosom Med* 2009;71(2):171-86.
78. Renner U, De Santana EC, Gerez J, Frohlich B, Haedo M, Pereda MP, et al. Intrapituitary expression and regulation of the gp130 cytokine interleukin-6 and its implication in pituitary physiology and pathophysiology. *Ann N Y Acad Sci* 2009;1153:89-97.
79. Meier-Ewert HK, Ridker PM, Rifai N, Price N, Dinges DF, Mullington JM. Absence of diurnal variation of C-reactive protein concentrations in healthy human subjects. *Clin Chem* 2001;47(3):426-30.
80. Vgontzas AN, Bixler EO, Lin HM, Prolo P, Trakada G, Chrousos GP. IL-6 and its circadian secretion in humans. *Neuroimmunomodulation* 2005;12(3):131-40.
81. Nierenberg AA, DeCecco LM. Definitions of antidepressant treatment response, remission, nonresponse, partial response, and other relevant outcomes: a focus on treatment-resistant depression. *J Clin Psychiatry* 2001;62 Suppl 16:5-9.
82. Rief W, Nestoriuc Y, Weiss S, Welzel E, Barsky AJ, Hofmann SG. Meta-analysis of the placebo response in antidepressant trials. *J Affect Disord* 2009;118(1-3):1-8.
83. Goldberg JF, Perlis RH, Ghaemi SN, Calabrese JR, Bowden CL, Wisniewski S, et al. Adjunctive antidepressant use and symptomatic recovery among bipolar

- 1  
2  
3  
4 depressed patients with concomitant manic symptoms: findings from the  
5 STEP-BD. *Am J Psychiatry* 2007;164(9):1348-55.
- 6 84. Gordon PH, Moore DH, Gelinas DF, Qualls C, Meister ME, Werner J, et al. Placebo-  
7 controlled phase I/II studies of minocycline in amyotrophic lateral sclerosis.  
8 *Neurology* 2004;62(10):1845-7.
- 9  
10 85. Collaborative meta-analysis of randomised trials of antiplatelet therapy for  
11 prevention of death, myocardial infarction, and stroke in high risk patients.  
12 *BMJ* 2002;324(7329):71-86.
- 13 86. Fries S, Grosser T. The cardiovascular pharmacology of COX-2 inhibition.  
14 *Hematology Am Soc Hematol Educ Program* 2005:445-51.
- 15 87. Grosser T, Yu Y, Fitzgerald GA. Emotion recollected in tranquility: lessons  
16 learned from the COX-2 saga. *Annu Rev Med* 2010;61:17-33.
- 17  
18 88. Patrono C, Collier B, FitzGerald GA, Hirsh J, Roth G. Platelet-active drugs: the  
19 relationships among dose, effectiveness, and side effects: the Seventh ACCP  
20 Conference on Antithrombotic and Thrombolytic Therapy. *Chest* 2004;126(3  
21 Suppl):234S-64S.
- 22  
23 89. Hansson L, Zanchetti A, Carruthers SG, Dahlof B, Elmfeldt D, Julius S, et al. Effects  
24 of intensive blood-pressure lowering and low-dose aspirin in patients with  
25 hypertension: principal results of the Hypertension Optimal Treatment  
26 (HOT) randomised trial. HOT Study Group. *Lancet* 1998;351(9118):1755-62.
- 27  
28 90. Zanchetti A, Hansson L, Leonetti G, Rahn KH, Ruilope L, Warnold I, et al. Low-  
29 dose aspirin does not interfere with the blood pressure-lowering effects of  
30 antihypertensive therapy. *J Hypertens* 2002;20(5):1015-22.
- 31  
32 91. Teo KK, Yusuf S, Pfeffer M, Torp-Pedersen C, Kober L, Hall A, et al. Effects of long-  
33 term treatment with angiotensin-converting-enzyme inhibitors in the  
34 presence or absence of aspirin: a systematic review. *Lancet*  
35 2002;360(9339):1037-43.
- 36  
37 92. De Angelis C, Drazen JM, Frizelle FA, Haug C, Hoey J, Horton R, et al. Clinical trial  
38 registration: a statement from the International Committee of Medical  
39 Journal Editors. *N Engl J Med* 2004;351(12):1250-1.
- 40  
41  
42  
43  
44  
45  
46  
47  
48  
49  
50  
51  
52  
53  
54  
55  
56  
57  
58  
59  
60

1  
2  
3  
4  
5  
6  
7  
8  
9  
10  
11  
12  
13  
14  
15  
16  
17  
18  
19  
20  
21  
22  
23  
24  
25  
26  
27  
28  
29  
30  
31  
32  
33  
34  
35  
36  
37  
38  
39  
40  
41  
42  
43  
44  
45  
46  
47  
48  
49  
50  
51  
52  
53  
54  
55  
56  
57  
58  
59  
60

For peer review only



1  
2  
3  
4  
5  
6  
7  
8  
9  
10  
11  
12  
13  
14  
15  
16  
17  
18  
19  
20  
21  
22  
23  
24  
25  
26  
27  
28  
29  
30  
31  
32  
33  
34  
35  
36  
37  
38  
39  
40  
41  
42  
43  
44  
45  
46  
47  
48  
49  
50  
51  
52  
53  
54  
55  
56  
57  
58  
59  
60

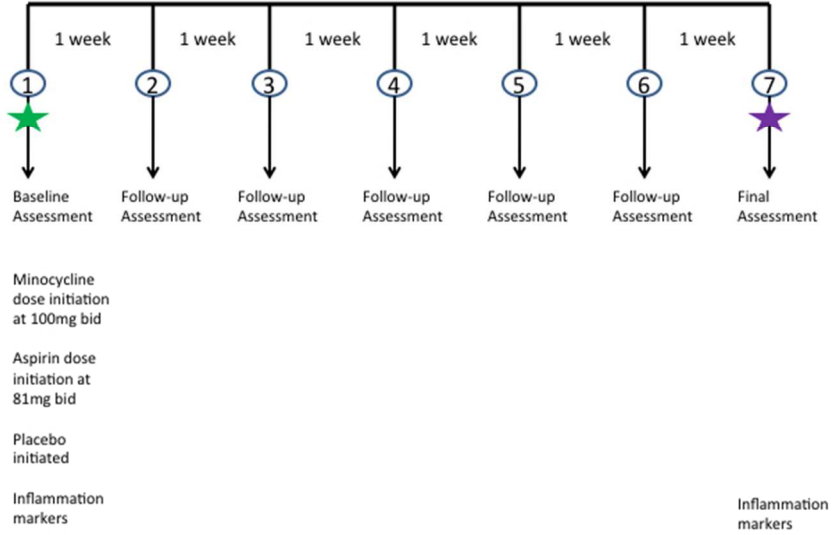

254x190mm (72 x 72 DPI)

ew only

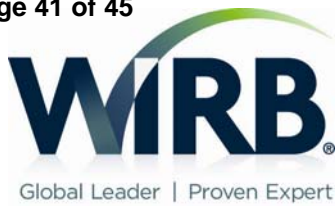

Western Institutional Review Board®  
 3535 7th Avenue SW | Olympia, WA 98502-5010  
 PO Box 12029 | Olympia, WA 98508-2029  
 Office: (360) 252-2500 | Toll Free: (800) 562-4789  
 www.wirb.com

# Certificate of Approval

## THE FOLLOWING WERE APPROVED

**INVESTIGATOR:** Wayne Drevets M.D.  
 6655 South Yale Avenue  
 Tulsa, Oklahoma 74136

**BOARD ACTION DATE:** 08/22/2011  
**PANEL:** 6  
**STUDY APPROVAL EXPIRES:** 08/05/2012  
**STUDY NUM:** 1126576  
**WIRB PRO NUM:** 20111159  
**INVEST NUM:** 160921  
**WO NUM:** 1-683377-1  
**CONTINUING REVIEW:** Annually  
**SITE STATUS REPORTING:** Semi-Annual

**SPONSOR:** Laureate Institute for Brain Research (LIBR)

**PROTOCOL NUM:** 2011-002-00

**AMD. PRO. NUM:**

**TITLE:**

MINOCYCLINE AND ASPIRIN IN THE TREATMENT OF BIPOLAR DEPRESSION

### **APPROVAL INCLUDES:**

Subject Information Sheet - Visit Five #9212383.0 - As Submitted  
 Subject Information Sheet - Visit Four #9212382.0 - As Submitted  
 Subject Information Sheet - Visit One #9212379.0 - As Submitted  
 Subject Information Sheet - Visit Six #9212384.0 - As Submitted  
 Subject Information Sheet - Visit Three #9212381.0 - As Submitted  
 Subject Information Sheet - Visit Two #9212380.0 - As Submitted  
 Consent Form [IN1]

### **WIRB APPROVAL IS GRANTED SUBJECT TO:**

**RE-CONSENTING INSTRUCTIONS:** Subjects currently enrolled are not required to sign the enclosed version(s) of the consent form(s). All subjects who will be enrolled in the future for this study must sign the most current WIRB-approved consent form(s).

### **WIRB HAS APPROVED THE FOLLOWING LOCATIONS TO BE USED IN THE RESEARCH:**

Laureate Institute for Brain Research, 6655 South Yale Avenue, Tulsa, Oklahoma 74136  
 University of Kansas Medical Center Research Institute, 8911 East Orme, Wichita, Kansas 67207

**If the PI has an obligation to use another IRB for any site listed above and has not submitted a written statement from the other IRB acknowledging WIRB's review of this research, please contact WIRB's Client Services department.**

IF YOU HAVE ANY QUESTIONS, CONTACT WIRB AT 1-800-562-4789

This is to certify that the information contained herein is true and correct as reflected in the records of the Western Institutional Review Board (WIRB), OHRP/FDA parent organization number IORG 0000432, IRB registration number IRB00000533. WE CERTIFY THAT WIRB IS IN FULL COMPLIANCE WITH GOOD CLINICAL PRACTICES AS DEFINED UNDER THE U.S. FOOD AND DRUG ADMINISTRATION (FDA) REGULATIONS, U.S. DEPARTMENT OF HEALTH AND HUMAN SERVICES (HHS) REGULATIONS, AND THE INTERNATIONAL CONFERENCE ON HARMONISATION (ICH) GUIDELINES.

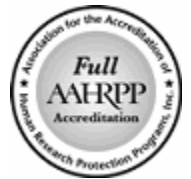

*Robert A Taylor for*

Theodore D. Schultz, J.D., Chairman

8/23/2011

(Date)

This document electronically reviewed and approved by Taylor, Robert on 8/23/2011 1:46:33 PM PST. For more information call Client Services at 1-360-252-2500.

For peer review only - <http://bmjopen.bmj.com/site/about/guidelines.xhtml>

1  
2 **ALL WIRB APPROVED INVESTIGATORS MUST COMPLY WITH THE FOLLOWING:**  
3

- 4 1. Conduct the research in accordance with the protocol, applicable laws and regulations, and the principles of research ethics as  
5 set forth in the Belmont Report.  
6  
7 2. Although a participant is not obliged to give his or her reasons for withdrawing prematurely from the clinical trial, the  
8 investigator should make a reasonable effort to ascertain the reason, while fully respecting the participant's rights.  
9  
10 3. Unless consent has been waived, conduct the informed consent process without coercion or undue influence, and provide the  
11 potential subject sufficient opportunity to consider whether or not to participate. (Due to the unique circumstances of  
12 research conducted at international sites outside the United States and Canada where WIRB approved materials are translated  
13 into the local language, the following requirements regarding consent forms bearing the WIRB approval stamp and regarding  
14 certification of translations are not applicable.)  
15 a. Use only the most current consent form bearing the WIRB "APPROVED" stamp.  
16 b. Provide non-English speaking subjects with a certified translation of the approved consent form in the subject's first  
17 language. The translation must be approved by WIRB.  
18 c. Obtain pre-approval from WIRB for use of recruitment materials and other materials provided to subjects.

- 19  
20  
21 4. Obtain pre-approval from WIRB for changes in research.  
22

- 23 5. Obtain pre-approval from WIRB for planned deviations and changes in research activity as follows:  
24

25 If this research is federally funded or conducted under an FWA, obtain pre-approval from WIRB for all planned  
26 deviations and changes in research activity, except where necessary to eliminate apparent immediate hazards to the human  
27 subjects. OHRP considers all planned protocol deviations to be changes in research that need prior IRB review and  
28 approval.  
29

30 If this research is **not** federally funded and **not** conducted under an FWA, obtain pre-approval from WIRB for any  
31 planned deviations that could adversely affect the rights, safety or welfare of subjects, or the integrity of the research data  
32 and any changes in the research activity, except where necessary to eliminate apparent immediate hazards to the human  
33 subjects. FDA has not adopted the policy that all planned protocol deviations are changes in research that need prior IRB  
34 review and approval.  
35

36 Deviations necessary to eliminate apparent immediate hazards to the human subjects should be reported within 10 days.  
37

- 38 6. Promptly report to WIRB all unanticipated problems (adverse events, protocol deviations and violations and other problems)  
39 that meet all of the following criteria:  
40 a. Unexpected (in terms of nature, severity or frequency);  
41 b. Related or possibly related to participation in the research; and  
42 c. Suggests that the research places subjects or others at a greater risk of harm than was previously known or  
43 recognized.  
44

45 Please go to [www.wirb.com](http://www.wirb.com) for complete definitions and forms for reporting.  
46

- 47 7. Provide reports to WIRB concerning the progress of the research, when requested.  
48  
49 8. Ensure that prior to performing study-related duties, each member of the research study team has had training in the  
50 protection of human subjects appropriate to the processes required in the approved protocol.  
51  
52

53 **Federal regulations require that WIRB conduct continuing review of approved research. You will receive Continuing**  
54 **Review Report forms from WIRB. These reports must be returned even though your study may not have started.**  
55  
56  
57  
58  
59  
60

1  
2  
3  
4  
5  
6  
7  
8  
9  
10  
11  
12  
13  
14  
15  
16  
17  
18  
19  
20  
21  
22  
23  
24  
25  
26  
27  
28  
29  
30  
31  
32  
33  
34  
35  
36  
37  
38  
39  
40  
41  
42  
43  
44  
45  
46  
47  
48  
49  
50  
51  
52  
53  
54  
55  
56  
57  
58  
59  
60

**DISTRIBUTION OF COPIES:**

**Contact, Company**

Karen Blackwell M.S., University of Kansas Medical Center

Rebecca Fears, Laureate Institute for Brain Research

Wayne Drevets M.D., Laureate Institute for Brain Research

For peer review only

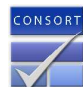

## CONSORT 2010 checklist of information to include when reporting a randomised trial\*

| Section/Topic                    | Item No | Checklist item                                                                                                                                                                              | Reported on page No |
|----------------------------------|---------|---------------------------------------------------------------------------------------------------------------------------------------------------------------------------------------------|---------------------|
| <b>Title and abstract</b>        |         |                                                                                                                                                                                             |                     |
|                                  | 1a      | Identification as a randomised trial in the title                                                                                                                                           | 1                   |
|                                  | 1b      | Structured summary of trial design, methods, results, and conclusions (for specific guidance see CONSORT for abstracts)                                                                     | 2                   |
| <b>Introduction</b>              |         |                                                                                                                                                                                             |                     |
| Background and objectives        | 2a      | Scientific background and explanation of rationale                                                                                                                                          | 3-13                |
|                                  | 2b      | Specific objectives or hypotheses                                                                                                                                                           | 20                  |
| <b>Methods</b>                   |         |                                                                                                                                                                                             |                     |
| Trial design                     | 3a      | Description of trial design (such as parallel, factorial) including allocation ratio                                                                                                        | 14-15               |
|                                  | 3b      | Important changes to methods after trial commencement (such as eligibility criteria), with reasons                                                                                          | NA                  |
| Participants                     | 4a      | Eligibility criteria for participants                                                                                                                                                       | 13-14               |
|                                  | 4b      | Settings and locations where the data were collected                                                                                                                                        | 17                  |
| Interventions                    | 5       | The interventions for each group with sufficient details to allow replication, including how and when they were actually administered                                                       | 15-16               |
| Outcomes                         | 6a      | Completely defined pre-specified primary and secondary outcome measures, including how and when they were assessed                                                                          | 20-21               |
|                                  | 6b      | Any changes to trial outcomes after the trial commenced, with reasons                                                                                                                       | NA                  |
| Sample size                      | 7a      | How sample size was determined                                                                                                                                                              | 21                  |
|                                  | 7b      | When applicable, explanation of any interim analyses and stopping guidelines                                                                                                                | 30                  |
| Randomisation:                   |         |                                                                                                                                                                                             |                     |
| Sequence generation              | 8a      | Method used to generate the random allocation sequence                                                                                                                                      | 15                  |
|                                  | 8b      | Type of randomisation; details of any restriction (such as blocking and block size)                                                                                                         |                     |
| Allocation concealment mechanism | 9       | Mechanism used to implement the random allocation sequence (such as sequentially numbered containers), describing any steps taken to conceal the sequence until interventions were assigned | 15                  |
| Implementation                   | 10      | Who generated the random allocation sequence, who enrolled participants, and who assigned participants to interventions                                                                     | 15                  |
| Blinding                         | 11a     | If done, who was blinded after assignment to interventions (for example, participants, care providers, those                                                                                | 15                  |

|    |                          |                                                                                                                     |       |
|----|--------------------------|---------------------------------------------------------------------------------------------------------------------|-------|
| 1  |                          |                                                                                                                     |       |
| 2  |                          | assessing outcomes) and how                                                                                         |       |
| 3  |                          |                                                                                                                     |       |
| 4  |                          | 11b If relevant, description of the similarity of interventions                                                     |       |
| 5  | Statistical methods      | 12a Statistical methods used to compare groups for primary and secondary outcomes                                   | 20-21 |
| 6  |                          | 12b Methods for additional analyses, such as subgroup analyses and adjusted analyses                                | 20-21 |
| 7  |                          |                                                                                                                     |       |
| 8  | <b>Results</b>           |                                                                                                                     |       |
| 9  | Participant flow (a      | 13a For each group, the numbers of participants who were randomly assigned, received intended treatment, and        |       |
| 10 | diagram is strongly      | were analysed for the primary outcome                                                                               |       |
| 11 | recommended)             | 13b For each group, losses and exclusions after randomisation, together with reasons                                |       |
| 12 | Recruitment              | 14a Dates defining the periods of recruitment and follow-up                                                         |       |
| 13 |                          | 14b Why the trial ended or was stopped                                                                              |       |
| 14 |                          |                                                                                                                     |       |
| 15 | Baseline data            | 15 A table showing baseline demographic and clinical characteristics for each group                                 |       |
| 16 | Numbers analysed         | 16 For each group, number of participants (denominator) included in each analysis and whether the analysis was      |       |
| 17 |                          | by original assigned groups                                                                                         |       |
| 18 |                          |                                                                                                                     |       |
| 19 | Outcomes and             | 17a For each primary and secondary outcome, results for each group, and the estimated effect size and its           |       |
| 20 | estimation               | precision (such as 95% confidence interval)                                                                         |       |
| 21 |                          | 17b For binary outcomes, presentation of both absolute and relative effect sizes is recommended                     |       |
| 22 | Ancillary analyses       | 18 Results of any other analyses performed, including subgroup analyses and adjusted analyses, distinguishing       |       |
| 23 |                          | pre-specified from exploratory                                                                                      |       |
| 24 |                          |                                                                                                                     |       |
| 25 | Harms                    | 19 All important harms or unintended effects in each group (for specific guidance see CONSORT for harms)            |       |
| 26 |                          |                                                                                                                     |       |
| 27 | <b>Discussion</b>        |                                                                                                                     |       |
| 28 | Limitations              | 20 Trial limitations, addressing sources of potential bias, imprecision, and, if relevant, multiplicity of analyses |       |
| 29 | Generalisability         | 21 Generalisability (external validity, applicability) of the trial findings                                        |       |
| 30 | Interpretation           | 22 Interpretation consistent with results, balancing benefits and harms, and considering other relevant evidence    |       |
| 31 |                          |                                                                                                                     |       |
| 32 | <b>Other information</b> |                                                                                                                     |       |
| 33 | Registration             | 23 Registration number and name of trial registry                                                                   | 1, 30 |
| 34 | Protocol                 | 24 Where the full trial protocol can be accessed, if available                                                      | 19    |
| 35 | Funding                  | 25 Sources of funding and other support (such as supply of drugs), role of funders                                  |       |
| 36 |                          |                                                                                                                     |       |

\*We strongly recommend reading this statement in conjunction with the CONSORT 2010 Explanation and Elaboration for important clarifications on all the items. If relevant, we also recommend reading CONSORT extensions for cluster randomised trials, non-inferiority and equivalence trials, non-pharmacological treatments, herbal interventions, and pragmatic trials. Additional extensions are forthcoming: for those and for up to date references relevant to this checklist, see [www.consort-statement.org](http://www.consort-statement.org).



**MINOCYCLINE AND ASPIRIN IN THE TREATMENT OF  
BIPOLAR DEPRESSION: a protocol for a proof-of-concept  
randomized, double-blind, placebo-controlled, 2x2, clinical  
trial**

|                                    |                                                                                                                      |
|------------------------------------|----------------------------------------------------------------------------------------------------------------------|
| Journal:                           | <i>BMJ Open</i>                                                                                                      |
| Manuscript ID:                     | bmjopen-2011-000643.R1                                                                                               |
| Article Type:                      | Protocol                                                                                                             |
| Date Submitted by the Author:      | 10-Jan-2012                                                                                                          |
| Complete List of Authors:          | Savitz, Jonathan; LIBR,<br>Preskorn, Sheldon<br>Teague, Kent<br>Drevets, Douglas<br>Yates, William<br>Drevets, Wayne |
| <b>Primary Subject<br>Heading</b>: | Mental health                                                                                                        |
| Secondary Subject Heading:         | Pharmacology & therapeutics, Mental health                                                                           |
| Keywords:                          | Depression & mood disorders < PSYCHIATRY, Schizophrenia & psychotic disorders < PSYCHIATRY, CLINICAL PHARMACOLOGY    |
|                                    |                                                                                                                      |

SCHOLARONE™  
Manuscripts



1  
2  
3  
4  
5  
6  
7  
8  
9  
10  
11  
12  
13  
14  
15  
16  
17  
18  
19  
20  
21  
22  
23  
24  
25  
26  
27  
28  
29  
30  
31  
32  
33  
34  
35  
36  
37  
38  
39  
40  
41  
42  
43  
44  
45  
46  
47  
48  
49  
50  
51  
52  
53  
54  
55  
56  
57  
58  
59  
60

**MINOCYCLINE AND ASPIRIN IN THE TREATMENT OF  
BIPOLAR DEPRESSION: a [protocol for a proof-of-concept  
randomized, double-blind, placebo-controlled, 2x2, clinical trial](#)**

Jonathan Savitz<sup>1,2</sup>, Ph.D., Sheldon H. Preskorn<sup>3</sup>, M.D., T. Kent Teague<sup>4</sup>,  
Ph.D., Douglas A. Drevets<sup>5</sup>, M.D., William Yates<sup>1</sup>, M.D., Wayne C.  
Drevets<sup>1,6\*</sup>, M.D.

Word Count = 8,424

Table = 1

Figures = 1

<sup>1</sup> Laureate Institute for Brain Research (LIBR), Tulsa, OK 74136, USA

<sup>2</sup> University of Tulsa, Tulsa, OK 74104, USA

<sup>3</sup> University of Kansas Clinical Research Institute, Wichita, KS 67214, USA

<sup>4</sup> Departments of Surgery and Psychiatry, University of Oklahoma College of Medicine, Tulsa,  
Department of Pharmaceutical Sciences, University of Oklahoma College of Pharmacy,  
Department of Microbiology and Biochemistry, Oklahoma State University Center for Health  
Sciences, Tulsa, OK 74135, USA

<sup>5</sup> Department of Medicine, Oklahoma University Health Sciences Center, and the Oklahoma City  
VAMC, Oklahoma City, OK 73014, USA

<sup>6</sup> Department of Psychiatry, University of Oklahoma College of Medicine, Tulsa, OK 74135,  
USA

\* Corresponding Author

[wdrevets@laureateinstitute.org](mailto:wdrevets@laureateinstitute.org)

LIBR

6655 South Yale Ave

Tulsa, OK 74136

Tel: 918 502 5102

Fax: 918 502 5135

**Key Words**

Bipolar Depression, Clinical Trial, Minocycline, Aspirin, Inflammation

## ABSTRACT

**Introduction:** New medication classes are needed to improve treatment effectiveness in the depressed phase of bipolar disorder (BD). Extant evidence suggests that BD is characterized by neural changes such as dendritic remodeling and glial and neuronal cell loss. These changes have been hypothesized to result from chronic inflammation. The principal aims of the proposed research is to evaluate the antidepressant efficacy in bipolar depression of minocycline, a drug with neuroprotective and immune-modulating properties, and of aspirin, at doses expected to selectively inhibit cyclooxygenase 1 (COX-1). **Methods and Analysis:** One hundred and twenty outpatients between 18 and 55 years of age, who meet DSM-IV-TR criteria for BD (type I or II) and for a current major depressive episode will be recruited to take part in a randomized, double-blind, placebo-controlled, parallel-group, [proof-of-concept](#), clinical trial following a 2 x 2 design. As adjuncts to existing treatment, subjects will be randomized to receive one of four treatment combinations: placebo-minocycline plus placebo-aspirin, active-minocycline plus placebo-aspirin, placebo-minocycline plus active-aspirin, or active-minocycline plus active-aspirin. The dose of minocycline and aspirin is 100mg bid and 81mg bid, respectively. Antidepressant response will be evaluated by assessing changes in the Montgomery-Asberg Depression Rating Scale (MADRS) scores between baseline and the end of the 6 week trial. As secondary outcome measures, the anti-inflammatory effects of minocycline and aspirin will be tested by measuring pre-and-post treatment levels of CRP and inflammatory cytokines. **Ethics and Dissemination:** Minocycline has been widely used as an antibiotic in doses up to 400 mg/day. Low dose aspirin has been safely used on a worldwide scale for its role as an anti-thrombotic and thrombolytic. The study progress will be overseen by a Data, Safety and Monitoring Board which will meet once every 6 months. Results of the study will be published in peer-reviewed publications. **Registration:** Clinical Trials.gov: NCT01429272.

## INTRODUCTION

The treatment of bipolar depression remains a major challenge for psychiatry. The US FDA has not approved any of the ~25 standard antidepressants for the treatment of bipolar depression, partly because these agents have not been robustly effective in BD patients<sup>1</sup>. Thus, currently approved treatments for bipolar depression include lithium, quetiapine, and the combination of olanzapine and fluoxetine<sup>2</sup>. Other treatments used include lamotrigine, conventional antidepressant agents, other atypical antipsychotics, pramipexole or riluzole (reviewed in <sup>3</sup>). Unfortunately, the effectiveness of these options also is limited. For example, in a placebo-controlled study in which subjects receiving lithium were randomized to receive either standard antidepressant pharmacotherapy (paroxetine or imipramine) or placebo, those receiving lithium plus an antidepressant did not show a significant improvement over those receiving lithium plus placebo<sup>4</sup>. Similarly, in the STEP-BD trial, 42 of 179 subjects (23.5%) receiving a mood stabilizer plus adjunctive antidepressant drug treatment had a durable recovery, which did not differ significantly from 51 of 187 subjects (27.3%) receiving mood stabilizer plus placebo. Mallinger et al. reported a similar durable recovery rate in BD depressives treated with mood stabilizer plus paroxetine (27%), but found a higher rate for adjunctive monoamine oxidase inhibitors (MAOIs; 53%)<sup>5</sup>, consistent with the findings of previous studies comparing MAOIs vs imipramine<sup>6,7</sup>. Unfortunately MAOIs are commonly unacceptable to patients.

New classes of antidepressant drugs are needed for bipolar depression. Existing agents exert their primary actions on monoaminergic systems. The efficacy of these agents contributed to the monoamine-deficiency hypothesis of depression, which continues to receive empirical support. Nevertheless, the field is in the early stages of a paradigm shift driven by evidence of dendritic remodeling and neuronal atrophy in animal models of depression, and of reductions in gray matter (GM) volume, and glial cell loss at *postmortem* in BD<sup>8</sup>. The neurotrophic effects of lithium, coupled with longitudinal studies demonstrating volumetric changes over time, raise the possibility that mood disorders are underpinned by a neurotoxic process<sup>8,9</sup>. The final common pathway through

1  
2  
3 which neurotoxic agents exert their effect is hypothesized to involve excess glutamatergic  
4 signaling<sup>10</sup>.  
5  
6

7  
8  
9 The glutamatergic model of mood disorders is based on the premise that excessive  
10 stimulation of NMDA-glutamatergic receptors, results in neuronal atrophy and apoptosis  
11 of glial and/or neuronal cells, and *ipso facto*, depression. Evidence for this hypothesis  
12 derives from multiple sources. In preclinical models, riluzole, which inhibits neuronal  
13 release of glutamate, ceftriaxone, which increases glutamate reuptake, and NMDA  
14 receptor antagonists such as ketamine, ameliorate behavioral analogs of depression<sup>11</sup>. In  
15 addition, rats bred to be genetically sensitive to stress show differential expression of  
16 NMDA receptors<sup>12</sup>, and behavioral analogs of depression are abrogated in NMDA  
17 receptor subunit knockout mice<sup>13</sup>. In humans, increased serum levels of glutamate that  
18 resolve with antidepressant treatment were reported in MDD, and extended to the CSF  
19 post mortem<sup>11</sup>. Polymorphisms of the metabotropic glutamate receptor genes, GRM2 and  
20 GRM3, and a haplotype of the glutamic acid decarboxylase (GAD2) gene were  
21 associated with MDD<sup>14</sup>. Finally, ketamine induced a rapid, sustained antidepressant  
22 effect in BD<sup>15 16</sup> and riluzole showed promising results in treatment-resistant depression<sup>15</sup>  
23  
24  
25  
26  
27  
28  
29  
30  
31  
32  
33  
34  
35  
36  
37  
38  
39  
40  
41  
42  
43  
44  
45  
46  
47  
48  
49  
50  
51  
52  
53  
54  
55  
56  
57  
58  
59  
60

One potential cause of the disruption in glutamatergic signaling in BD is dysregulation of  
the immune system. Increased levels of proinflammatory cytokines such as interleukin 6  
(IL-6), IL-1 $\beta$ , interferon alpha (IFN $\alpha$ ), tumor necrosis factor alpha (TNF- $\alpha$ )  
prostaglandinE2 (PGE2), and chemokine ligand 2 (CCL2) are consistently observed in  
the blood and CSF of patients with mood disorders, both at baseline and after exposure to  
stressors<sup>17 18</sup>. Elevated serum levels of (pro-inflammatory) positive acute-phase proteins  
(e.g., haptoglobin,  $\alpha$ 1-antitrypsin, ceruloplasmin, C-reactive protein), but reduced levels  
of negative acute-phase proteins (e.g., albumin and retinal-binding protein) also are  
reported in mood disorders<sup>19-21</sup>. Further, treatment of hepatitis C with IFN $\alpha$  is known to  
induce the major depressive syndrome and/or manic symptoms in [approximately 40%](#) of  
patients, and the efficacy of conventional antidepressant drugs is associated with a  
reduction in inflammation<sup>18</sup>. Moreover, anti-tumor necrosis factor (TNF) therapy (for

1  
2  
3 psoriasis) can improve mood<sup>22</sup>. Since proinflammatory cytokines can alter brain function,  
4 these data are compatible with evidence that an activated inflammatory response system  
5 exists in mood disorders which plays a role in their pathophysiology<sup>23-26</sup>.  
6  
7  
8

9  
10 The over-activity of the hypothalamic-pituitary-adrenal axis in mood disorders may play  
11 a role in inflammation, since hypersecretion of corticotrophin-releasing hormone (CRH)  
12 activates the transcription factor, nuclear factor kappa B (NF-κB). NF-κB regulates the  
13 expression of proinflammatory cytokines in immune cells in the CNS and periphery, and  
14 the expression of genes involved in apoptosis<sup>27</sup>. In addition, NF-κB may result in the  
15 expression of the class 1 major histocompatibility complex (MHC I), labeling cells for  
16 removal by cytotoxic T-cells<sup>27</sup>. Usually, cortisol suppresses this inflammatory response,  
17 but chronic stress appears to desensitize the glucocorticoid receptor (GR) and by  
18 extension, the anti-inflammatory effects of cortisol<sup>27</sup>. Cytokines play a role in  
19 desensitizing the system to cortisol. For example, IL1 and TNF-α retard dexamethasone-  
20 induced translocation of the GR receptor from the cytoplasm to the nucleus<sup>28</sup>.  
21  
22  
23  
24  
25  
26  
27  
28  
29  
30

31 The immunologic and glutamatergic models of BD are complementary because a  
32 proinflammatory state is one potential cause of excitotoxicity<sup>27</sup>. Peripheral inflammatory  
33 signals activate microglia in the brain, inducing an inflammatory cascade of cytokines  
34 and free radicals. Cytokines and reactive oxygen and nitrogen species exert a direct toxic,  
35 apoptotic effect on oligodendrocytes. Potentially through the loss of oligodendrocytes,  
36 oxidative stress can lead to demyelination. Such a process conceivably may account for  
37 the reduction in oligodendroglia found *postmortem* in the prefrontal cortex<sup>29</sup> in mood  
38 disorders. The inflammatory milieu also compromises astrocyte function, leading to  
39 down-regulation of glutamate transporters and impaired glutamate reuptake into  
40 astrocytes, further amplifying inflammatory signaling<sup>27</sup>.  
41  
42  
43  
44  
45  
46  
47  
48  
49  
50

51 In addition, cytokines such as interleukin 1 (IL-1), IL-6, and TNF-α activate indoleamine  
52 2, 3-dioxygenase (IDO). IDO catalyzes the breakdown of tryptophan, the amino-acid  
53 precursor of serotonin, and an important regulator of T-cell function, into kynurenine  
54 (Kyn)<sup>30</sup>. Activation of the Kyn pathway shunts tryptophan away from 5-HT synthesis,  
55  
56  
57  
58  
59  
60

1  
2  
3 putatively reducing serotonergic transmission. Kyn is in turn metabolized into quinolinic  
4 acid (Quin), a potent NMDA receptor agonist, and neuromodulator involved in lipid  
5 peroxidation, which can induce neuronal damage via oxidative stress and overstimulation  
6 of NMDA receptors<sup>30</sup>. Consistent with inflammation-related shunt towards Kyn  
7 metabolism, the plasma tryptophan-Kyn ratio was found to correlate inversely with  
8 striatal total choline (a putative cell membrane turnover biomarker) in adolescents with  
9 melancholic depression<sup>31</sup>.  
10  
11  
12  
13  
14  
15  
16

17  
18 The mRNA transcripts for proinflammatory genes appear particularly sensitive for  
19 discriminating BD patients. Microarray gene expression profiles in purified CD14+  
20 monocytes from whole blood of BD subjects, offspring of BD parents, and healthy  
21 controls (HC) displayed a distinct mRNA signature representing genes from  
22 inflammatory and inflammation-related pathways<sup>32</sup>. The signature showed >80%  
23 sensitivity and specificity in BD subjects who were not receiving lithium or antipsychotic  
24 drugs (n=11), and in affected offspring of a BD parent (n=13, of whom 10 had only  
25 manifested depression). A positive signature also was present in 17 of 38 unaffected  
26 offspring (45%) versus 13 of 70 healthy children (19%). Cross-sectional comparisons  
27 suggested lithium and antipsychotic drugs—but not conventional antidepressant drugs--  
28 down-regulated expression of most inflammatory genes. Thus, when medicated and  
29 unmedicated subjects were considered together only 23 of 42 BD patients (55%) had a  
30 positive signature versus 7 of 38 HCs (18%). Notably, the IL6 mRNA level remained  
31 elevated in medicated BD subjects and did not differ significantly from unmedicated  
32 subjects (table 1), suggesting that this assay identifies a proinflammatory diathesis even  
33 in treated cases.  
34  
35  
36  
37  
38  
39  
40  
41  
42  
43  
44  
45  
46  
47  
48  
49  
50  
51  
52  
53  
54  
55  
56  
57  
58  
59  
60

**Table 1:** Magnitude of difference in mRNA expression between mood disordered and healthy control (HC) samples from Padmos et al.<sup>32</sup>, showing selected transcripts in unmedicated subjects vs HCs, relative to that of medicated BD subjects.

| Gene Symbol | Unmedicated BD vs HC |         | Medicated BD vs HC |         | Affected offspring# vs HC |         |
|-------------|----------------------|---------|--------------------|---------|---------------------------|---------|
|             | fold change          | p-value | fold change        | p-value | fold change               | p-value |
| PDE4B       | 13.73*               | <.001   | 3.42               | <.001   | 5.79                      | <.001   |
| IL6         | 37.92                | .005    | 9.56               | .006    | 935.7                     | <.001   |
| CCL20       | 55.49                | .006    | 6.02               | .10     | 400.1                     | <.001   |

**Legend:** \* - difference significant between unmedicated vs medicated BD samples; # - affected with respect to having manifested either a depressive or a manic episode  
 Sample sizes: unmedicated BD n=11, medicated BD n=31, affected offspring n=13, HCs n=25 for comparisons against BD adults, n=70 for comparisons of offspring. Abbrev: BD – bipolar disorder; HC – healthy control; PDE4B - phosphodiesterase type 4B; IL6 - interleukin 6; CCL20-chemokine ligand 20

**Minocycline is a second-generation tetracycline that may prevent both glutamate-induced excitotoxicity and cytokine-induced inflammation in the CNS and periphery.**

Minocycline has high lipophilicity enabling efficient transfer across the blood brain barrier (BBB)<sup>33</sup> - its concentration in CSF reaches 11–56% of plasma concentrations<sup>34</sup>. Minocycline inhibits the microglial-mediated release of proinflammatory cytokines IL-1 $\beta$ , TNF- $\alpha$ , IL-6, and p38<sup>35</sup>, while promoting release of the anti-inflammatory cytokine, IL-10<sup>34</sup>. Moreover, minocycline inhibits matrix metalloproteinases which process



1  
2  
3 cytokines such as TNF- $\alpha$  and IL-1 $\beta$  into their biologically active forms<sup>35</sup>. Minocycline is  
4 also an effective scavenger of proapoptotic reactive oxygen species and protects against  
5 excitotoxicity by preventing glutamate-induced activation of nitric oxide synthase  
6 (NOS)<sup>36</sup>. Nitric oxide facilitates glutamate release from presynaptic neurons and inhibits  
7 glial glutamate transporters, amplifying glutamatergic signaling, and contributing to  
8 excitotoxic cell death<sup>10</sup>. Minocycline also upregulates a key molecular factor in the  
9 apoptosis pathway, B-cell CLL/lymphoma 2 (BCL-2)<sup>37</sup>, an effect shared by lithium,  
10 valproate<sup>38</sup> and certain antidepressant drugs<sup>39</sup>. BCL-2 represses apoptosis induced by  
11 cytotoxic insults<sup>40</sup>. Conceivably, minocycline may additionally reduce inflammation  
12 indirectly by blocking the translocation of bacteria across the intestinal barrier. In mice  
13 exposed to a social stressor, bacteria translocated across the intestinal barrier stimulating  
14 the release of circulating cytokines such as IL6, and increasing microbicidal activity via  
15 inducible NOS<sup>41</sup>. Additionally, stress induced a change in the community structure of the  
16 microflora in the cecum with a decrease the relative abundance of bacteria in the genus  
17 Bacteroides and an increase the relative abundance of bacteria in the genus Clostridium.  
18 Notably, these effects were blocked by pretreatment with a broad spectrum antibiotic<sup>41</sup>.  
19  
20  
21  
22  
23  
24  
25  
26  
27  
28  
29  
30  
31

### 32 33 **Minocycline has neuroprotective and anti-inflammatory properties.**

34  
35  
36  
37 Minocycline prevents glutamate-induced apoptosis of neurons *in vitro*<sup>42</sup>, prevents  
38 ischemia-induced activation of microglia in gerbils<sup>43</sup>, increases hippocampal neuron  
39 survival<sup>44</sup>, reduces lesion-volume and improves neurological function in mice with  
40 traumatic brain injury<sup>45</sup> and in fragile X syndrome<sup>46</sup>, reduces pro-inflammatory cytokine  
41 expression and improves neurological function and locomotor activity in rats with spinal  
42 cord injury<sup>47</sup>, attenuates MDMA-induced neurotoxicity of serotonin and dopamine  
43 systems in the cerebral cortex and hippocampus of mice<sup>48</sup>, reduces inflammation in a rat-  
44 model of rheumatoid arthritis (RA)<sup>49</sup>, and delays disease progression and demyelination  
45 in rodent models of encephalitis<sup>50</sup>, amyotrophic lateral sclerosis (ALS)<sup>51</sup> and  
46 Huntington's Disease (HD)<sup>52</sup>. Based on these data, minocycline was employed, and has  
47 shown promise as, a therapeutic agent in human diseases including HD<sup>53</sup>, rheumatoid  
48 arthritis (RA)<sup>54</sup>, and stroke<sup>55</sup>.  
49  
50  
51  
52  
53  
54  
55  
56  
57  
58  
59  
60

### **Minocycline has been used to treat psychiatric disorders.**

Miyaoka et al.<sup>56</sup> discussed 2 patients with catatonic schizophrenia who benefited from minocycline. This group then conducted a 4-week trial with minocycline (150 mg/day) in 22 patients with schizophrenia to evaluate its efficacy as an adjunct to antipsychotic drugs<sup>57</sup>. Patients showed a significant improvement in positive and negative symptoms. Levkovitz et al.<sup>58</sup> recently studied 54 patients with early-stage schizophrenia treated for 6 months with antipsychotic medication and either minocycline (200 mg/day) or placebo in a double-blind trial. Minocycline was associated with a reduction in negative symptoms and improved attention/ memory.

The efficacy of minocycline has not been formally tested in mood disorders. In rodents, minocycline reduced immobility during the forced-swim test<sup>59</sup>, and co-administration of minocycline synergized the antidepressant-like actions of desipramine (but not fluoxetine)<sup>60</sup>. Minocycline also abrogated the depression-like behavior of rodents exposed to lipopolysaccharide (LPS)<sup>61</sup>. Levine et al.<sup>62</sup> presented the case of a 66-year old woman with severe BD, who observed that the tetracycline she took for an infection alleviated her depression. When her depression returned post-treatment, minocycline was reinitiated (150 mg/day). After one week her HAM-D score fell from 25 to 8.

### **Aspirin (Acetyl-salicylic acid, ASA) also holds potential efficacy in bipolar disorder.**

The second aim of this study is to assess the antidepressant efficacy of ASA in bipolar depression. Using a 2 x 2 design we will obtain data providing estimates of the effect size of ASA relative to placebo, ASA relative to minocycline, and ASA in combination with minocycline relative to placebo. These data also will explore the specificity of any effect found for minocycline. The clinical use of low dose ASA primarily has been driven by its role as an anti-thrombotic and thrombolytic. Given the exaggerated death rate from cardiovascular events in BD, this action potentially is advantageous in the management of BD. Nevertheless, the recent literature also supports a role for low dose ASA in the

1  
2  
3 management of the mood disorder itself, specifically in the amelioration of depressive  
4 symptoms.  
5  
6

7  
8 The mechanism of ASA relates to its capacity to inactivate irreversibly the  
9 cyclooxygenase (COX) activity of prostaglandin (PG) H-synthase-1 and PGH-synthase 2  
10 (referred to as COX-1 and COX-2, respectively). Although ASA has a short half-life (15  
11 to 20 min) ASA's permanent inhibition of COX-1 allows once daily dosing for anucleate  
12 platelets. In contrast, because nucleated cells rapidly regenerate this enzyme a shorter  
13 dosing interval is required to persistently impact COX activity in cells that mediate  
14 inflammatory processes. Moreover, ASA is 50- to 100-fold more potent in inhibiting  
15 platelet COX-1 than monocyte COX-2 activity<sup>63</sup>, so there is nearly a 100-fold variation in  
16 the daily dose of aspirin, as higher doses are used to target COX-2 in the management of  
17 treating peripheral inflammation (e.g., arthritis) or pain. As reviewed below, preliminary  
18 evidence obtained in BD suggests beneficial effects are achieved using ASA in low  
19 doses, where aspirin would inhibit COX-1, but not COX-2.  
20  
21  
22  
23  
24  
25  
26  
27  
28  
29  
30

### 31 **Aspirin has neuroprotective and anti-inflammatory properties.**

32  
33  
34

35 In the brain, recent data indicate that genetic manipulation of COX-1 and COX-2  
36 differentially modulate leukocyte recruitment during neuroinflammation, and suggest that  
37 reduction of COX-1 activity is neuroprotective, whereas reduction in COX-2 activity is  
38 detrimental, during a primary neuroinflammatory response (reviewed in <sup>64</sup>). Choi et al.<sup>64</sup>  
39 propose that these distinct roles reflect the predominant localization of COX-1 in  
40 microglia, which play a major role in mediating neuroinflammation, in contrast to the  
41 predominant localization of COX-2 in pyramidal neurons. For example, Choi et al.<sup>65</sup>  
42 examined the effects of COX-1 or COX-2 deficiency on intracerebroventricular  
43 lipopolysaccharide (LPS)-induced neuroinflammation by comparing COX-1 (-/-) and  
44 COX-2 (-/-) knockout mice to wild-type (WT) (+/+) control animals. After LPS,  
45 leukocyte infiltration and inflammatory response were attenuated in the COX-1 (-/-) mice  
46 but increased in the COX-2 (-/-) mice, compared with WT controls. In another study,  
47 Choi et al.<sup>66</sup> examined the effect of COX-1 genetic deletion on the inflammatory  
48  
49  
50  
51  
52  
53  
54  
55  
56  
57  
58  
59  
60

1  
2  
3 response and neurodegeneration induced by  $\beta$ -amyloid, and found that in COX-1 (-/-)  
4 mice, the  $A\beta_{1-42}$ -induced inflammatory response and associated neuronal damage  
5 were attenuated compared to WT mice. Compatible with these results, in  
6  
7 pharmacoepidemiological studies investigating whether chronic NSAID use reduced the  
8 risk of developing Alzheimer's disease (AD), indomethacin, a preferential COX-1  
9 inhibitor, showed beneficial effects, while COX-2 selective inhibitors, failed to show  
10 any beneficial effect in AD patients with mild to severe cognitive impairment. These data  
11 suggest the hypothesis that inhibition of COX-1 activity may be a valid therapeutic  
12 strategy to reduce the cerebral inflammatory response and neurodegeneration in  
13 neuropsychiatric diseases in which neuroinflammatory components play a role in  
14 pathophysiology.  
15  
16  
17  
18  
19  
20  
21  
22  
23

24 Other researchers hypothesized that NSAIDs would be beneficial in BD more specifically  
25 because of their ability to down-regulate activity in the brain arachidonic acid (AA)  
26 cascade by via interfering with phospholipase A2 (PLA2) and/or COX function. In  
27 rodents Rapoport and colleagues<sup>67-69</sup> demonstrated that conventional mood stabilizers  
28 decrease the AA turnover in phospholipids and the expression of PLA2 and/or COX  
29 enzymes. The PLA2 and COX enzymes catalyze, respectively, release of AA from  
30 membrane phospholipid and AA conversion to eicosanoids such as prostaglandin E2 and  
31 thromboxane B2. The AA cascade is involved in neuroreceptor-initiated signaling and  
32 can be pathologically upregulated by neuroinflammation and excitotoxicity.  
33  
34  
35  
36  
37  
38  
39  
40  
41

42 Nevertheless, aspirin has additional mechanisms that may underlie benefits in  
43 neuropsychiatric illness. While low-dose aspirin down-regulates AA cascade activity via  
44 inhibition of COX-1 activity, in higher doses it also down-regulates COX-2 gene  
45 transcription, increases levels of lipoxygenase-derived eicosanoids such as the anti-  
46 inflammatory lipoxin A4, and acetylates COX-2 protein to a modified enzyme that can  
47 convert unesterified AA to anti-inflammatory mediators such as 15-epi-lipoxin A4  
48 (reviewed in <sup>70</sup>). The acylated enzyme also can convert docosahexaenoic acid (DHA) to  
49 17-(R)-OH-DHA, which, like its metabolites di(R)-OH-DHA (neuroprotectin (R) D1)  
50 and tri(R)-OH-DHA (resolvin (R) D1), is highly anti-inflammatory (reviewed in <sup>70</sup>).  
51  
52  
53  
54  
55  
56  
57  
58  
59  
60

1  
2  
3  
4  
5  
6  
7  
8  
9  
10  
11  
12  
13  
14  
15  
16  
17  
18  
19  
20  
21  
22  
23  
24  
25  
26  
27  
28  
29  
30  
31  
32  
33  
34  
35  
36  
37  
38  
39  
40  
41  
42  
43  
44  
45  
46  
47  
48  
49  
50  
51  
52  
53  
54  
55  
56  
57  
58  
59  
60

Lithium given chronically to rats with lipopolysaccharide-induced neuroinflammation also increases the brain concentration of 17-OH-DHA. Thus, there may be a synergy between aspirin and lithium in forming anti-inflammatory brain DHA metabolites.

### **Aspirin appears effective in preliminary studies of mood disorders.**

Pharmaco-epidemiological data in BD supportive of these hypotheses were published by Stolk et al.<sup>70</sup>. Using the Netherlands based PHARMO Record Linkage System (which connects pharmacy dispensing records to hospital discharge records of > two million individuals since 1985), these researchers tested whether non-steroidal anti-inflammatory drugs (NSAIDs) or glucocorticoids would ameliorate bipolar symptoms. The target sample consisted of 5,145 patients receiving lithium (mean age = 48.6 ± 15 yrs; mean duration of lithium use=847 days), based upon the assumption that lithium treatment is relatively specific to individuals with BD. The main outcome measure was a calculated incidence density (ID) of medication events (change in the type or numbers of psychotropic medications prescribed, or increase [ $>30\%$ ] in the psychotropic drug dose). Subjects receiving low-dose ( $\leq 80$  mg/day) aspirin were 17% less likely to have a medication event, a finding that remained significant after adjusting for age, sex, chronic disease score and health care utilization. This effect was selective for low-dose ASA. In contrast, high-dose aspirin or non-selective NSAIDs (i.e., regimens expected to inhibit both COX-1 and -2), selective COX-2 inhibitors and glucocorticoids did not produce a statistically significant protection. Instead, the co-administration of non-selective NSAIDs and glucocorticoids was associated with statistically significant increases in medication events, suggesting destabilization of bipolar illness. The finding that low-dose aspirin decreased the number of medication events was particularly noteworthy since aspirin does not significantly augment serum lithium levels in contrast to selective COX-2 inhibitors which can raise lithium levels<sup>71</sup>. These preliminary observations thus appeared consistent with the hypothesis that COX-1 inhibitors can reduce neuroinflammatory processes and thus benefit BD patients.

1  
2  
3 Notably, the observation that beneficial effects in BD were conferred by low-dose ASA,  
4 but not by nonselective COX inhibitors, COX-2 inhibitors or glucocorticoids, appeared  
5 inconsistent with the hypothesis that drugs that down-regulate AA cascade activity in  
6 general hold therapeutic potential in BD. Thus the putative neuroprotective effects  
7 associated with COX-1 inhibition may contribute specifically to the benefits of low-dose  
8 aspirin in BD observed by Stolk et al. For example, as reviewed above, aspirin and  
9 lithium may exert synergistic effects in forming anti-inflammatory brain DHA  
10 metabolites (reviewed in <sup>70</sup>).

11  
12  
13  
14  
15  
16  
17  
18  
19  
20 Other data suggest that aspirin exerts antidepressant effects within the context of MDD or  
21 cardiovascular illness. Mendlewicz et al.<sup>72</sup> examined the effect of aspirin augmentation of  
22 conventional antidepressant pharmacotherapy in 24 patients with MDD who had proven  
23 non-responsive after 4 weeks of SSRI treatment. Participants were treated openly during  
24 the subsequent 4 weeks with aspirin 160 mg/day in addition to their SSRI regimen. The  
25 combined administration of SSRI plus aspirin was associated with a response rate of  
26 52.4%. Remission was achieved in 43% of the total sample and 82% of the responder  
27 sample. In the responder group, a significant improvement was observed within week 1  
28 and this benefit persisted through day 28. In another study Ketterer et al.<sup>73</sup> reported that  
29 in 174 males undergoing coronary angiography (of whom 99 were taking low-dose  
30 aspirin), aspirin use was associated with less depression and anxiety symptoms.

31  
32  
33  
34  
35  
36  
37  
38  
39  
40 In contrast, a preliminary study of the selective COX-2 inhibitor, celecoxib, was negative  
41 in bipolar depression<sup>74</sup>, potentially compatible with the negative results of COX-2  
42 inhibitors reported by Stolk et al.<sup>70</sup>. In a double-blind, randomized, add-on clinical trial of  
43 celecoxib in patients (n = 28) studied during a depressed or mixed episode of BD, no  
44 significant difference was observed between the celecoxib and placebo add-on groups at  
45 study endpoint<sup>74</sup>. These results contrasted with those obtained using celecoxib in unipolar  
46 depression, however. In MDD, celecoxib augmentation of either reboxetine<sup>75</sup> or  
47 fluoxetine<sup>76</sup> was associated with a significant therapeutic effect on depressive symptoms  
48 in randomized, double-blind, add-on clinical trials.

## METHODS AND ANALYSIS

### Participants

One hundred and twenty male or female outpatients between 18 and 55 years of age, who meet DSM-IV-TR criteria for BD (type I or II) and for a current major depressive episode will be recruited. The depressive syndrome must have been present for at least 4 weeks and the minimum threshold for depression severity will be set at a 17-item HAM-D score  $\geq 18$ . Subjects will provide written informed consent as approved by the Western Institutional Review Board.

### Concurrent Medications

At study entry type I BD subjects must have been taking a stable dose of a mood-stabilizing medication (lithium, valproate, carbamazepine, lamotrigine, antipsychotic agents), for at least 4 weeks, dosed clinically to target the therapeutic range. Type II BD subjects will be included irrespective of whether they present on a mood stabilizer. To investigate the utility of this augmentation strategy in the population for whom minocycline is most likely to prove therapeutically relevant, volunteers receiving stable doses of mood stabilizing, antipsychotic, antidepressant, and/or anxiolytic drugs for at least 4 weeks will be included. However, volunteers who currently are receiving more than 4 psychotropic medications in a daily regimen will be excluded, since this condition may signify a more brittle or complex clinical state. Subjects may remain in psychotherapy or have no psychosocial intervention. Volunteers will be excluded if they currently are receiving medications likely to have adverse interactions with minocycline or aspirin, including [NSAIDS](#), warfarin, digoxin, penicillins, and isotretinoin products.

For participants who enter the study, the preferred strategy will be for subjects to maintain the same regimen of concurrent medications throughout the six week study so that only the study drug regimen will be altered per protocol. Nevertheless, changes to concurrent medications will not affect study status, so long as the medication change does



1  
2  
3 not target a depressive or manic symptom. If changes to concurrent medication regimens  
4 are clinically required to address worsening depressive symptoms or the development of  
5 manic symptoms, then the subject will be dropped from the study.  
6  
7  
8  
9

## 10 **Study Design**

11  
12  
13  
14 Patients will participate in a randomized, double-blind, placebo-controlled, trial with a 2  
15 x 2 design. As adjuncts to existing treatment, subjects will receive placebo-minocycline  
16 plus placebo-aspirin, active-minocycline plus placebo-aspirin, placebo-minocycline plus  
17 active-aspirin, or active-minocycline plus active-aspirin. The randomization sequences  
18 will be determined by a research staff-member who is not obtaining clinical information  
19 from the research subject and will be assigned by subject number at consenting. [A  
20 restricted randomization \(permuted block randomization\) method will be used in which  
21 subjects are randomly allocated to each block \(n=30\) to ensure that equal numbers of  
22 participants receive each drug/placebo combination. In order to ensure that experimental  
23 group assignment is not skewed across the two trial sites, the study progress will be  
24 monitored by individuals who are not involved in the data collection, and in the case of  
25 “drift”, adjustments will be made as necessary.](#)  
26  
27  
28  
29  
30  
31  
32  
33  
34  
35  
36

37 The trial will be conducted over 6 weeks and will comprise 7 assessment sessions (figure  
38 1). The subject will be seen at the prescribed time intervals within a window of two  
39 business days on either side of visit target date to complete the specified visits.  
40  
41  
42

43  
44 At each session, a clinical assessment will be conducted using the rating scales listed  
45 below, and treatment side-effects will be assessed and rated for severity. To preserve the  
46 rater blind, the research staff member who conducts the clinical ratings will not be the  
47 research staff member who assesses the presence of side effects, and will remain blind to  
48 the information pertaining to side effects. Subjects who experience severe adverse effects  
49 or who develop treatment-associated hypomania or mania will be dropped from the  
50 study, instructed to discontinue the study medication, and referred for appropriate clinical  
51 management of these adverse events.  
52  
53  
54  
55  
56  
57  
58  
59  
60

1  
2  
3  
4  
5 The primary outcome measure will be the change in the Montgomery-Asberg Depression  
6 Rating Scale (MADRS) scores [at the seventh assessment session \(week 6\)](#).  
7  
8  
9

## 10 Medication

11  
12  
13  
14 This pilot proof-of-concept study will adhere to the dosing limits and route of  
15 administration for the FDA indications for minocycline's and aspirin's use in other  
16 conditions (thus an IND is not required). A fixed dose design will be followed, and all  
17 medications will be administered via the p.o. route. The pilot data extant for both study  
18 drugs supports an onset of improvement within two weeks, so the six week study  
19 duration is expected to provide sufficient time to detect an antidepressant effect, to  
20 provide information about the persistence of the antidepressant effect over about one  
21 month from the anticipated onset of effect, and to minimize dropouts.  
22  
23  
24  
25  
26  
27  
28

29  
30 For minocycline the starting dose will be 100 mg b.i.d. (total daily dose=200 mg). This  
31 dose of 100 mg b.i.d. has been shown by a substantial literature to produce consistent  
32 anti-inflammatory effects in rheumatoid arthritis and other inflammatory disorders. This  
33 also is the dose used in a recent schizophrenia treatment trial<sup>58</sup>. The associated placebo  
34 capsules match the appearance of the 100 mg minocycline capsule.  
35  
36  
37  
38  
39

40 The starting dose of aspirin will be 81 mg p.o. b.i.d. This dose is sufficient to inhibit  
41 COX-1, and appeared beneficial in stabilizing the course of BD in the pharmaco-  
42 epidemiological study of Stolk et al.<sup>70</sup>. When aspirin is used as an anti-platelet drug once  
43 daily dosing is sufficient since anucleate platelets do not produce enough COX-1 to  
44 overcome the irreversible inhibition of COX-1 within a 24-hour period. In contrast, in  
45 nucleated cells COX-1 is replenished, so more frequent dosing is required to persistently  
46 inhibit COX-1. Thus we will administer the dose in a b.i.d. regimen, according to the  
47 guidelines described above. A total daily dose of 160 mg was administered in the  
48 preliminary study which reported that aspirin significantly augmented the antidepressant  
49  
50  
51  
52  
53  
54  
55  
56  
57  
58  
59  
60

1  
2  
3 effects of fluoxetine in MDD<sup>72</sup>. The relevant placebo matches the appearance of the  
4 aspirin tablet.  
5  
6

7  
8  
9 Participants will be advised that one of the study drugs may reduce the efficacy of oral  
10 contraceptives, and to avoid taking the study drugs within 3 hours of iron products or of  
11 antacids containing calcium, magnesium or aluminum. They also will be advised that one  
12 study drug can increase their risk for bleeding during surgical procedure or if combined  
13 with other drugs or herbal preparations that reduce hemostasis.  
14  
15  
16

### 17 18 19 **Compensation**

20  
21  
22 Participants will be compensated for participation in the amount of \$300.00.  
23  
24  
25

### 26 27 **Treatment Compliance**

28  
29  
30 To enhance compliance, study participants will be given an information sheet to take  
31 home detailing the procedure to be followed in the case of a missed dose, and requesting  
32 that this information be recorded for the investigators. The number of capsules and tablets  
33 remaining in each supply given to the patients will also be counted to evaluate treatment  
34 compliance. In cases where treatment compliance is poor, subjects will be excluded from  
35 the data analysis, using conventional criteria for defining adequate compliance in a  
36 clinical trial.  
37  
38  
39  
40  
41

42  
43  
44 [Fig. 1, here]  
45  
46

### 47 48 **Psychiatric Assessment and Clinical Ratings**

49  
50  
51 Patients will be evaluated and followed in the outpatient clinics at LIBR or Oklahoma  
52 University School of Community Medicine in Tulsa, OK, or at the University of Kansas  
53 Medical Center Research Institute (KUMCRI) in Wichita, KS. The diagnosis of BD will  
54 be established using DSM-IV-TR criteria on the basis of an unstructured interview  
55  
56  
57  
58  
59  
60

1  
2  
3 conducted by a psychiatrist and the MINI-Plus administered by trained psychiatric  
4 interviewers. The following rating scales will be administered: MADRS, Quick Inventory  
5 of Depressive Symptomatology (QUIDS; 16 item), Hamilton Anxiety Rating Scale  
6 (HAM-A), Young Mania Rating Scale (YMRS), Universal Fagerstrom (to assess nicotine  
7 use), Hollingshead socioeconomic scale, Sheehan Disability Scale (SDS) and the Family  
8 Interview for Genetic Studies (FIGS). Medical assessment will include a physical  
9 examination, electrocardiogram, complete blood count (CBC), electrolytes and liver-  
10 function assays (SMA 20), thyroid panel, and urinalysis, serum drug and pregnancy tests  
11 at study entry and study completion. At each follow-up session, the MADRS, HAM-A,  
12 YMRS, and Clinical Global Impressions (CGI) scale will be repeated. Physical and  
13 psychiatric symptoms will be evaluated and recorded in order to measure the side-effect  
14 profiles of minocycline and aspirin. Participants will be questioned about adverse  
15 reactions, including dizziness, photosensitivity, hyperpigmentation, gastrointestinal  
16 distress or bleeding at each assessment and will be withdrawn from the study if medically  
17 necessary. Vital signs will be measured at entry and at each session.  
18  
19  
20  
21  
22  
23  
24  
25  
26  
27  
28  
29  
30  
31

### 32 **Immune System Measures**

33  
34  
35 The activity of peripheral cytokines correlates with inflammatory processes in the CNS.  
36 Peripheral cytokines cross the BBB, and can propagate signals across the BBB in the  
37 form of small, freely diffusible lipophilic molecules such as prostaglandins, which induce  
38 the production of cytokines from glia<sup>77</sup>. The measurement of peripheral markers of  
39 inflammation thus serves as a valid, if indirect assessment of CNS inflammation.  
40  
41  
42  
43  
44  
45

46 To explore predictors and correlates of treatment outcome, blood will be sampled for  
47 testing plasma and whole blood peripheral blood monocyte (PBM) based markers of  
48 inflammation at baseline and study end. These markers will include 10 cytokine proteins  
49 (IL-1 $\beta$ , IL-2, IL-4, IL-5, IL-6, IL-8, IL-10, IL-12p70, IFN $\gamma$ , and TNF, high sensitivity  
50 (hs) CRP, and RNA expression of candidate genes from PBMCs. Candidate genes  
51 include IL-6, TNF, and IRF5 ( a factor that mediates monocyte polarization). The 10  
52 inflammation-related cytokines and the PBMC mRNA will be assayed from plasma at  
53  
54  
55  
56  
57  
58  
59  
60

1  
2  
3 baseline and study end. We selected the markers IL-6, TNF and CRP because they are the  
4 most widely implicated in mood disorders. The other cytokines included in the cytokine  
5 bead array assays are measured simultaneously with IL-6 and have all been implicated in  
6 the general regulation of inflammation. A meta-analysis of >100 studies found that IL-6  
7 and CRP each were significantly elevated in depressed patients with standardized mean  
8 difference scores (d) of 0.71 and 0.26, respectively<sup>78</sup>. The associations remained  
9 significant after adjustment for body-mass index (BMI) and smoking. Moreover, IL-6 has  
10 been shown to modulate HPA axis function by inducing CRH release,  
11 adrenocorticotrophic hormone synthesis, and corticosteroid production<sup>79</sup>. CRP production  
12 is induced by the proinflammatory cytokines, IL-1, IL-6, and IL-17, and is thus a non-  
13 specific marker of systemic inflammation.  
14  
15  
16  
17  
18  
19  
20  
21  
22  
23

24  
25 Three blood samples will be transported to the immunology lab in the Department of  
26 Surgery at the University of Oklahoma College of Medicine for each participant at each  
27 of the sampling time-points (sessions 1 and 7). One sample will be centrifuged to obtain  
28 plasma which will be stored at -80°C until analyzed. Serum CRP, IL-6, TNF, and the  
29 other cytokines listed above will be assayed in duplicate with ELISA (CRP high-  
30 sensitivity kit, R & D Systems, Oxford, UK) or enhanced cytokine bead array flex kits  
31 (Becton Dickinson) using the manufacturer's reagents and standards. The other two  
32 samples will be used to isolate PBMCs and plasma and will be frozen until processed.  
33 Monocytes will be isolated from the PBMCs in order to assess mRNA levels similar to  
34 the method used by Padmos et al.<sup>32</sup>. This procedure utilizes monoclonal antibodies  
35 directed against human CD14 to isolate monocytes in peripheral blood monocyte cell  
36 suspensions. A magnetic cell sorting system will be used for the separation of the  
37 monocytes and flow cytometry will be used to gauge the purity of the population. Once  
38 purity is established, total RNA will be isolated from the monocytes using an RNeasy kits  
39 (Qiagen) according to the manufacturer's directions. RNA will then be reverse  
40 transcribed to cDNA using standard commercial kits. rtPCR reactions will be performed  
41 using the Dynamo Sybr Green HS Master Mix (New England Biolabs) and custom  
42 primers will be synthesized by a commercial laboratory. Real-time rtPCR reactions will  
43 be run using a Cepheid Smart Cyclo II or similar instrument. Additional aliquots of  
44  
45  
46  
47  
48  
49  
50  
51  
52  
53  
54  
55  
56  
57  
58  
59  
60

1  
2  
3 serum and plasma will be stored so that other inflammatory markers can be tested in the  
4 future using Luminex bead arrays and/or additional available technologies.  
5  
6  
7

### 8 9 **Source of Compounds Tested**

10  
11  
12 Minocycline and aspirin are available on a generic basis, and are manufactured within the  
13 USA by several companies. The identity of the active medicines and placebos will be  
14 blinded using placebos that match the appearance of the active drugs. The medications  
15 and placebos have been formulated by Wedgewood Pharmacy, Swedesboro, NJ. The  
16 study minocycline capsule and chewable aspirin tablet are identical in appearance to their  
17 corresponding placebos.  
18  
19  
20  
21  
22  
23

### 24 25 **Outcome Measures and Data Analysis**

26  
27  
28 Antidepressant response will be evaluated by assessing changes in MADRS scores at  
29 assessment session # 7 (i.e. 6 weeks). Our a priori hypothesis is that minocycline and/or  
30 aspirin plus existing medication will exert greater antidepressant effects than placebo plus  
31 existing medication by study completion. Assuming that there are equal numbers of  
32 subjects in each treatment group, this hypothesis will be statistically assessed using a  
33 group (for the four treatment cells)-by-session (1 vs. 7) repeated measures analysis of  
34 variance (ANOVA). If the ANOVA statistic is significant, between- and within-group t  
35 tests will be used in planned comparisons to identify the nature of the effect leading to the  
36 significant overall ANOVA statistic. We expect to find a significant group-by-session  
37 interaction, attributable to a greater reduction in MADRS scores in the minocycline and  
38 aspirin groups compared to the placebo group between session 1 and session 7. If there is  
39 an imbalance in the number of subjects across groups, (e.g., due to differential dropout  
40 rates during the first treatment week), the data analysis will be conducted with a mixed-  
41 effects model.  
42  
43  
44  
45  
46  
47  
48  
49  
50  
51  
52

53  
54  
55 A Mixed Effect Model Repeated Measure (MMRM)<sup>80</sup> will be used to impute missing  
56 data points as this method has been shown to be superior to last observation carried  
57  
58  
59  
60

1  
2  
3 [forward \(LOCF\) which can inflate the Type I error rates<sup>81</sup>. The LOCF and observed cases](#)  
4 [\(OC\) approaches to data imputation will be used \*post-hoc\* to provide further confirmation](#)  
5 [of the results obtained under the MMRM analysis.](#)  
6  
7  
8

9  
10 In order to test whether the putative antidepressant effects of minocycline or aspirin have  
11 a rapid onset, as a *post hoc* analysis the ANOVA will be repeated using MADRS ratings  
12 from the assessment that follows the first week of exposure to active drug versus the  
13 corresponding change under placebo; i.e. session 2. *Post hoc* tests will be performed to  
14 assess the significance of changes in the secondary clinical outcome measures (QUIDS  
15 16, HAM-A, YMRS, CGI-I).  
16  
17  
18  
19

20  
21 The rate of completion in the [four](#) cells also will be considered an outcome measure. The  
22 completion rate in the minocycline [and/or aspirin](#) arms may be influenced more by  
23 dropouts due to side effects while the completion rate in the placebo group may be  
24 influenced more by dropouts due to non-response. [Two different measures of completion](#)  
25 [rate will be obtained: completion of week 1 of the study \(baseline to week 1\) and](#)  
26 [completion of the study \(baseline to week 6\). Differences between the groups in](#)  
27 [completion rates will be assessed with an ANOVA.](#)  
28  
29  
30  
31  
32  
33  
34  
35

36  
37 We will test the hypothesis that minocycline and aspirin reduce inflammation (e.g. CRP,  
38 IL-6, IL-6 mRNA) more than placebo using statistical analyses similar to those described  
39 above. If the assay results are normally distributed then a group-by-session repeated-  
40 measures ANOVA with CRP, IL-6 and nine other cytokine levels as dependent variables,  
41 and BMI, smoking status, and time of blood draw as covariates, will be used to assess  
42 anti-inflammatory effects of minocycline and aspirin. [Mixed-effect models will be used if](#)  
43 [necessary.](#) If the CRP or inflammatory cytokine data are not normally distributed  
44 (Kolmogorov-Smirnov test) or if the equality of statistical variance assumption across  
45 assessments is violated (Levene's test), then Friedman's ANOVA will be used to test for  
46 CRP or inflammatory cytokine differences between groups. If the Friedman's ANOVA  
47 statistic is significant, Wilcoxon sign-ranked tests will be used for post-hoc analysis of  
48 group differences. Nonspecific factors that influence CRP and inflammatory cytokine  
49  
50  
51  
52  
53  
54  
55  
56  
57  
58  
59  
60



1  
2  
3 levels include time of day, presence of infection, treatment with anti-inflammatory  
4 medications, smoking, obesity, and alcohol abuse. We will attempt to control for these  
5 potential confounds by measuring BMI and recording NSAID and nicotine use  
6 (Universal Fagerstrom scale), and by excluding individuals who have recently abused  
7 substances or who have intercurrent infections. The serum CRP concentration shows  
8 minimal diurnal variability in adults<sup>82</sup> but IL-6 and other cytokine levels vary across time  
9 of day<sup>83</sup>. To minimize cytokine measurement variability due to circadian fluctuations, we  
10 will schedule patient assessment sessions at the same time each day. Since this may not  
11 always be possible, we will record the time of day that each blood-draw is made, divide  
12 the day into quartiles: 7am-10am, 10am-12pm; 12pm-3pm, and 3pm-6pm, and use these  
13 data as a covariate in the statistical analyses.  
14  
15  
16  
17  
18  
19  
20  
21  
22  
23

24  
25 To test whether baseline levels of CRP and inflammatory cytokines predict response to  
26 minocycline or aspirin, we will subclassify the participants using conventional criteria<sup>84</sup>  
27 as achieving full response ( $\geq 50\%$  reduction in MADRS score from baseline), partial  
28 response ( $< 50\%$  but  $\geq 25\%$  reduction), or nonresponse ( $< 25\%$  reduction). Patients  
29 achieving remission (post-treatment MADRS score  $\leq 10$ ) will also be identified. A non-  
30 parametric alternative to the ANOVA statistic, the Mann-Whitney test, will be used to  
31 compare remitted and non-remitted groups in baseline levels of inflammatory cytokines  
32 and CRP if the data are not normally distributed. Ideally, the impact of baseline levels of  
33 inflammation on treatment response would be tested more rigorously using a formal  
34 stratified design. However, in order to conduct a stratified trial with for example, 8  
35 experimental groups (4 x high versus low inflammation), the sample size of the study  
36 would have to be doubled, which would significantly increase costs and decrease  
37 feasibility. Nevertheless, this stratification approach would be important to consider for  
38 future studies if promising results are obtained in this clinical trial.  
39  
40  
41  
42  
43  
44  
45  
46  
47  
48  
49

## 50 51 **Statistical Power**

52  
53  
54  
55 A recent meta-analysis of 96 antidepressant treatment studies found that the average  
56 effect size of a placebo treatment is 1.69 compared with 2.50 for an antidepressant  
57  
58  
59  
60

1  
2  
3 treatment<sup>85</sup>. We calculated that in order to detect [an effect size](#) of 0.81 ([i.e. the difference](#)  
4 [between 2.50 and 1.69](#)) with an 80% probability (2-sided test,  $\alpha=0.05$ ), we will require a  
5 sample size of 26 subjects per group  
6  
7  
8 ([http://hedwig.mgh.harvard.edu/sample\\_size/size.html](http://hedwig.mgh.harvard.edu/sample_size/size.html)). Thus given our sample size of 30  
9 per group we should have sufficient power to test Specific Aim 1, allowing for a 13%  
10 drop-out rate [during week 1 of the study \(dropouts after completion of study week 1 will](#)  
11 [be included in the analysis under the MMRM approach described above\)](#).  
12  
13  
14  
15  
16

17  
18 As discussed above, a recent meta-analysis<sup>78</sup> of cross-sectional studies of serum-derived  
19 IL-6 and CRP in depression calculated effect sizes of 0.71 for IL-6 and 0.26 for CRP.  
20 Based on these effect sizes a sample size of 26 would yield >80% probability of detecting  
21 significant depression-related changes in IL-6, but only a 60% probability of detecting a  
22 depression-related change in CRP. There are 3 reasons why we believe that these CRP  
23 power estimations are not applicable to this study. Firstly, the effect sizes derived from  
24 the meta-analysis are based on cross-sectional studies. Given the effect of variables such  
25 as smoking, diet, exercise, and BMI on proinflammatory cytokines, a within-subjects  
26 design is likely to reduce non-depression-related sources of variance, and substantially  
27 increase statistical power. Secondly, we are not only examining the effect of mood on IL-  
28 6 and CRP levels, but are treating patients with minocycline and aspirin, drugs known to  
29 possess anti-inflammatory properties. We therefore suggest that our proposed study is  
30 likely adequately powered to detect any true changes in plasma IL-6, CRP, and the other  
31 inflammatory cytokines across treatment blocks.  
32  
33  
34  
35  
36  
37  
38  
39  
40  
41  
42  
43

44 Regarding IL-6 mRNA gene expression in peripheral blood monocytes, Padmos et al.<sup>32</sup>  
45 reported a 38-fold increase in IL-6 mRNA levels in unmedicated patients with BD  
46 compared with HC. Since minocycline reduces IL-6 levels (see above) we expect our  
47 study to have very high power to detect differences between groups, as well as changes in  
48 response to minocycline. The simultaneous detection of nine other inflammation-related  
49 cytokines, in addition to IL-6 (using newer more sensitive technology) will provide much  
50 finer resolution of the effects on inflammatory cascades than that measured in previous  
51 studies.  
52  
53  
54  
55  
56  
57  
58  
59  
60

## ETHICS AND DISSEMINATION

### Gender/Minority/Pediatric Inclusion for Research

Women and Minorities will be included in the study without prejudice according to their representation in the study population. Participants will be recruited from the greater metropolitan areas of Tulsa, OK and Wichita, KS and efforts will be made to ensure that our subject population resembles the gender, ethnic and racial composition of these areas.

### Exclusion Criteria

The following exclusion criteria apply: 1) inability to provide informed consent; 2) age of onset of BD > 40 years; 3) serious risk of suicide; 4) current delusions or hallucinations sufficient to interfere with the capacity to provide informed consent; 5) current manic symptoms [depressed BD patients with concurrent manic symptoms have been found to be more likely to experience adverse reactions in antidepressant treatment trials<sup>86</sup>]; 6) medical illness including as hepatic impairment, renal dysfunction, bleeding diatheses (e.g., hemophilia), cerebrovascular disease or heart disease, hypertension that is inadequately controlled by medication, diabetes mellitus, or known peptic ulcer disease; 7) abuse of drugs or alcohol within the preceding 6 months, or substance dependence within the last 5 years; 8) daily alcoholic beverage consumption equivalent to  $\geq 3$  oz. of alcohol; 9) asthma or known allergies or hypersensitivities to tetracycline antibiotics, aspirin or other NSAIDs; 10) current use of drugs that could increase the risks associated with aspirin or minocycline administration, namely other antibiotic medications, other NSAIDs or anticoagulants (e.g., warfarin), acetazolamide, or methotrexate; 11) known HIV or other chronic infection including, but not limited to viral hepatitis. 12) Pregnant or nursing women, and women who are attempting to conceive during the 6 week study period, will also be excluded.

### Specimens, Records, and Data Collection

1  
2  
3  
4  
5 A physician, registered nurse, or trained phlebotomist will utilize a sterile technique to  
6 draw 60 ml of blood by venipuncture. Participants will also be asked to submit a urine  
7 sample. A physician, registered nurse, or trained technician will collect EKG data from  
8 the subject in a private exam room.  
9  
10  
11

### 12 13 14 **Recruitment and Consent Procedure** 15

16  
17  
18 Volunteers will be recruited from the community as well as from the clinical services at  
19 the Laureate Psychiatric Clinic and Hospital and the Oklahoma University School of  
20 Community Medicine in Tulsa, OK, and from the clinical services affiliated with the  
21 KUMCRI. Volunteers may be referred from sources that include physicians, newspaper  
22 advertising, self-help organizations, self-referral, and WIRB approved flyers posted at  
23 local universities, schools, churches and grocery stores. Participants may be pre-screened  
24 through screening protocols based at LIBR or KUCRI. We plan to recruit a total of 120  
25 participants.  
26  
27  
28  
29  
30  
31

32  
33 All participant interactions including consenting will be conducted in private interview /  
34 exam rooms. These rooms are secured from public areas via combination locked doors  
35 that are only accessible to authorized personnel. Prospective participants will receive an  
36 explanation of the objectives, procedures, and hazards of this protocol that is appropriate  
37 to their level of understanding. The right of the subject to decline to participate or to  
38 withdraw from the study at any time will be made clear.  
39  
40  
41  
42  
43  
44

45  
46 Non-English speaking participants will not be recruited.  
47  
48

49  
50 After the consent form is verbally explained to the participant, and any questions have  
51 been answered, the researcher will leave the room to allow the participant to read the  
52 consent form thoroughly. Family members will be allowed to be present and to discuss  
53 the consenting process with the participant. After the consent is read, the researcher will  
54 return and answer any additional questions the participant may have. The researcher will  
55  
56  
57  
58  
59  
60

1  
2  
3 remind the subject that participation is strictly voluntary and that they have the right to  
4 withdraw at any time. Participants will be asked to arrive 30 minutes early in order to  
5 have sufficient time for the consenting process.  
6  
7  
8  
9

## 10 **Subject Risks**

11  
12  
13  
14 The risks of behavioral testing are minimal. The risks of blood drawing are also minimal.  
15 Possible mild side effects of the blood draw include mild pain or bruising at the site of  
16 the venipuncture.  
17  
18  
19

20  
21 Minocycline has been used a broad-spectrum antibiotic for many years in doses up to 400  
22 mg/day<sup>34</sup>. It has been used on a chronic basis to treat acne and rheumatoid arthritis, often  
23 for many years, in hundreds of thousands of patients. The most commonly encountered  
24 side effects are upset stomach, diarrhea, dizziness, drowsiness, ataxia, vertigo, headache  
25 and vomiting. Prolonged use can be associated with pigmentation of the skin, gums or  
26 teeth. Between 1975 and 2006, the World Health Organization Collaborating Center for  
27 International Drug Monitoring listed 122 cases of adverse drug reactions to intravenous  
28 minocycline; most commonly, abnormal hepatic function and thrombocytopenia<sup>34</sup>. These  
29 included cases of serious liver injury, including irreversible drug-induced hepatitis and  
30 fulminant hepatic failure that was fatal in two cases, thought to be due to triggering or  
31 unmasking autoimmune hepatitis. One case of autoimmune-related glomerulonephritis  
32 has been reported. The role of oral minocycline in precipitating these conditions has not  
33 been clearly established. Minocycline also has been associated with idiopathic  
34 intracranial hypertension (pseudotumor cerebri). Long-term trials have shown that  
35 minocycline is well tolerated. In a 2-year trial of minocycline (200 mg/day) for RA, 3 of  
36 30 patients withdrew due to finger-nail discoloration, dizziness, or erythematous rash<sup>54</sup>.  
37 Of 11 patients with HD treated with minocycline (100 mg/day) for 2 years, one  
38 complained of nausea in the first 3 weeks, and two of sedation<sup>53</sup>, while in a 6-month trial  
39 of minocycline for ALS, the mean tolerated dose was 387 mg/day and the most common  
40 adverse effects were gastrointestinal<sup>87</sup>. Five of 36 patients with schizophrenia withdrew  
41  
42  
43  
44  
45  
46  
47  
48  
49  
50  
51  
52  
53  
54  
55  
56  
57  
58  
59  
60

1  
2  
3 from a 6-month trial of minocycline (200 mg/day) due to indigestion (n=2), pigmentation  
4 (n=2), or a suicide attempt (n=1)<sup>58</sup>.  
5  
6

7  
8  
9 Low dose aspirin has been safely used in many millions of patients on a worldwide scale  
10 for its role as an anti-thrombotic and thrombolytic. A meta-analysis of >100 randomized  
11 trials in high-risk patients indicated that low-dose ASA reduced cardiovascular death by  
12 15% and prevented nonfatal vascular events by about 30%<sup>88</sup>. These data stand in striking  
13 contrast to the data obtained in COX-2 inhibitors, which can increase cardiovascular risk.  
14 In clinical trials of several COX-2 selective and nonselective NSAIDs of up to three years  
15 duration have shown an increased risk of serious cardiovascular (CV) thrombotic events,  
16 myocardial infarction, and stroke, which have in many cases been fatal<sup>89</sup>. Patients with  
17 known CV disease or risk factors for CV disease are at greater risk for such events during  
18 chronic treatment with COX-2 inhibitors. Evidence from human pharmacology and  
19 genetics, genetically manipulated rodents, and other animal models and randomized trials  
20 indicates that this is consequent to suppression of COX-2-dependent cardioprotective  
21 prostaglandins, particularly prostacyclin<sup>90</sup>.  
22  
23  
24  
25  
26  
27  
28  
29  
30  
31  
32

33 Aspirin does not cause a generalized bleeding abnormality unless given to patients with  
34 an underlying hemostatic defect (e.g., hemophilia, uremia, or that induced by  
35 anticoagulant therapy). Aspirin-induced impairment of primary hemostasis cannot be  
36 separated from its antithrombotic effect and is similar at all doses  $\geq 75$  mg/d<sup>91</sup>. The risk  
37 of intracranial bleeding is exceedingly rare (<0.1% in high risk populations), but is higher  
38 in individuals with cerebrovascular disease<sup>88</sup>. Hypertension that is inadequately  
39 controlled by medication often is considered a contraindication to aspirin because of the  
40 concern that possible benefits in the prevention of cardiovascular events may be  
41 counterbalanced by an increased risk of cerebral bleeding. However, hypertensive  
42 patients whose blood pressure is well-controlled appear protected from myocardial  
43 infarction by aspirin therapy without an increase in the number of cerebral hemorrhages  
44 or strokes<sup>92</sup>. Moreover, aspirin therapy does not affect blood pressure or the response of  
45 hypertension to antihypertensive agents<sup>91 93</sup>.  
46  
47  
48  
49  
50  
51  
52  
53  
54  
55  
56  
57  
58  
59  
60

1  
2  
3 NSAIDs as a class can cause serious gastrointestinal (GI) adverse events including  
4 inflammation, bleeding, ulceration, and perforation of the stomach, small intestine, or  
5 large intestine, which rarely have proven fatal. In controlled clinical trials the percentage  
6 of patients reporting one or more gastrointestinal complaints has ranged from 4% to  
7 16%<sup>91</sup>. The mechanism underlying this adverse effect appears attributable to the  
8 inhibition of COX-1. Thus, the incidence of GI side effects has been higher for NSAIDs  
9 with more potent effects at COX-1, such as aspirin and indomethacin. For example, in  
10 controlled trials the incidence of GI side effects for aspirin and indomethacin have been  
11 about twice as high as that for ibuprofen, a nonselective COX inhibitor, in equally  
12 effective doses for arthritis. Nevertheless, the incidence of GI side effects associated with  
13 aspirin is dose-dependent, and thus is markedly lower when using aspirin in the low dose  
14 range planned for the current study. Notably, the risk of GI bleeding is not reduced by  
15 using the enterically coated aspirin formulations, but is thought to be lower during  
16 concomitant use of omeprazole<sup>91</sup>. The effects of warfarin and NSAIDs on GI bleeding are  
17 synergistic, such that the users of both drugs together have a risk of serious GI bleeding  
18 higher than users of either drug alone. Fortunately, the risk of GI bleeding, which reflects  
19 the inhibition of prostaglandins in the stomach (from systemic rather than local exposure)  
20 is much smaller when using low-dose as opposed to high-dose aspirin.  
21  
22  
23  
24  
25  
26  
27  
28  
29  
30  
31  
32  
33  
34  
35  
36

37 Low-dose aspirin has not been reported to alter renal function, and does not reduce  
38 effectiveness of ACE inhibitors for HTN (in contrast to other NSAIDs)<sup>93 94</sup>. However,  
39 aspirin can inhibit the renal clearance of acetazolamide and methotrexate potentially  
40 leading to increased blood concentrations of and toxicity from these agents. Salicylate  
41 can displace other drugs which are protein-bound, especially phenytoin and valproic acid,  
42 increasing their free drug concentrations in plasma. This may increase side effects,  
43 toxicity and/or efficacy for displaced drugs. If the BD subjects are currently receiving  
44 valproic acid preparations (e.g., divalproex) then the plasma levels of these agents will be  
45 monitored for potential changes.  
46  
47  
48  
49  
50  
51  
52  
53  
54

55 Aspirin may cause a severe allergic reaction that may include: hives, asthma (wheezing),  
56 facial swelling, shock. Aspirin overdose can be fatal at 30 g or higher.  
57  
58  
59  
60



1  
2  
3  
4  
5 In sum, we believe that our two-by-two design is appropriate for trials involving  
6 experimental drugs that already have been well-studied with respect to toxicity, as is the  
7 case with aspirin and minocycline. A parallel arm design, as opposed to a 2 x 2 factorial  
8 design, would be more clearly informative in the case of an experimental drug for which  
9 the toxicity and drug interaction potential have not been thoroughly studied in human  
10 subjects  
11  
12  
13  
14  
15

### 16 17 18 **PHI Protection** 19

20  
21 Paper copies of consents, screening forms, the Research Privacy Form, and any other  
22 forms, testing results or papers containing Protected Health Information (PHI) will be  
23 stored in a secured medical records room with access granted only to authorized  
24 personnel.  
25  
26  
27  
28

29  
30 Electronic data that contain PHI will be managed in accordance with ISO 27000 series  
31 information security standards with policies developed from current NIST guidelines (SP  
32 800-66) for HIPAA and HITECH compliance. Specific controls implemented to protect  
33 PHI are derived from NIST 800-122, and include (but not limited to):  
34  
35  
36

- 37 1) Access Enforcement (AC-3) – Individual user accounts, role based access control,  
38 access control lists;
- 39 2) Separation of Duties (AC-5) – de-identification of data as appropriate,  
40 acquire/analyze/manage firewall;
- 41 3) Least Privilege (AC-6) – to ensure PHI data is only available to persons with  
42 established need for access;
- 43 4) Remote Access (AC-17) – Secure VPN, encrypted end devices;
- 44 5) Access Control for Mobile Devices (AC-19) – Password login, remote destruction  
45 capabilities;
- 46 6) Auditable Events (AU-2) + Monitoring: Log detailed server and network  
47 information, alert for problems;
- 48  
49  
50  
51  
52  
53  
54  
55  
56  
57  
58  
59  
60

- 1
  - 2
  - 3
  - 4
  - 5
  - 6
  - 7
  - 8
  - 9
  - 10
  - 11
  - 12
  - 13
  - 14
  - 15
  - 16
  - 17
  - 18
  - 19
  - 20
  - 21
  - 22
  - 23
  - 24
  - 25
  - 26
  - 27
  - 28
  - 29
  - 30
  - 31
  - 32
  - 33
  - 34
  - 35
  - 36
  - 37
  - 38
  - 39
  - 40
  - 41
  - 42
  - 43
  - 44
  - 45
  - 46
  - 47
  - 48
  - 49
  - 50
  - 51
  - 52
  - 53
  - 54
  - 55
  - 56
  - 57
  - 58
  - 59
  - 60
- 7) Analysis, and Reporting (AU-6) – Procedures to audit system records for inappropriate activity.
- 8) User Identification and Authentication (IA-2) – username/secure password and two factor authentication will be required when appropriate.
- 9) Media Access, Marking, Storage, and Transport (MP-2,3,4,5) – Records will be asset tagged and marked to their PHI status, PHI data will be secured and managed by professional system administrators, and will be transported via encryption (VPN, USB, File);
- 10) Media Sanitization (MP-6) – Data will be destroyed by SFHS in accordance with their policies and procedures;
- 11) Transmission Confidentiality (SC-9) – Encryption will be used when needed for all avenues of data transmission (wireless, network, etc.).

To protect subject confidentiality, blood samples will be anonymized as follows:

1. Last name: All participants will be assigned the last name “LIBR.”
2. First name: The first name will be a secure alpha cryptographic hash based on LIBR user ID. This technique is the gold standard in computer security for one-way correlation of data.

### Benefits versus Risks

The participant may benefit from participation if either study drug produces an antidepressant effect. Participants will also receive a free clinical evaluation; more frequent treatment visits than are typical in practice, diligent follow-up in terms of symptoms and side effects, and physical and psychiatric monitoring during the study. The risks of delaying alternative treatments are minimal in relation to the potential long-term benefits to the subjects and the importance of knowledge that may reasonably result. The importance of the knowledge that will likely be gained from this study clearly exceeds the associated potential risks.

### Alternative Treatment

1  
2  
3 It is possible that some patients may feel better with talk therapy. Participating in any  
4 type of talk therapy with their psychiatrist or psychologist does not require dropping out  
5 of this study. Subjects will be encouraged to contact the study investigators, particularly  
6 the physician in the study, with any questions they may have regarding alternatives to  
7 treatment through this research study. The study investigators will assist in referring the  
8 subject to another physician for treatment after their participation in the study has ended.  
9 Physical and psychological testing, blood draws, urine samples, and EKG data provide no  
10 known risks to persons other than those listed in the exclusion criteria whereas the  
11 combinatory power of these measures may provide information relevant to understanding  
12 the pathophysiology of bipolar disorder.  
13  
14  
15  
16  
17  
18  
19  
20  
21

### 22 **Data and Safety Monitoring Plan**

23  
24  
25  
26 This study involves more than minimal risk. The study progress will be overseen by a  
27 Data, Safety and Monitoring Board (DSMB). The DSMB is composed of three members  
28 who will meet in person or per telephone at least once every 6 months to review relevant  
29 study data including adverse events and dropout rates.  
30  
31  
32  
33

34  
35 Any unanticipated adverse events will be reported immediately to the IRB of record and  
36 to the LIBR Human Protection Administrator. Any adverse events will be included in the  
37 annual IRB report.  
38  
39  
40

### 41 **Dissemination of Results**

42  
43  
44  
45 The study results will be presented at national and/or international biomedical scientific  
46 meetings and published in peer-reviewed journals.  
47  
48  
49

### 50 **REGISTRATION**

1  
2  
3 In accordance with the recommendations of the International Committee of Medical  
4 Journal Editors<sup>95</sup>, the proposed trial is registered in a public registry  
5 ([www.clinicaltrials.gov](http://www.clinicaltrials.gov) Identifier: NCT01429272).  
6  
7  
8  
9

## 10 11 **Figure Legend**

### 12 13 14 **Figure 1: Schematic of Study Design**

15  
16  
17  
18 *Legend: Each session number (total of 7) is encircled, with the timing between sessions*  
19 *indicated in weeks with a 2 business day window on either side of visit target date to*  
20 *complete the visit. Session 1 is the baseline (green star) and session 7 is the study end*  
21 *(purple star). Peripheral blood will be sampled at baseline and study end to assay*  
22 *markers of inflammation. The study duration is 6 weeks.*  
23  
24  
25  
26  
27  
28

## 29 30 **Author Contributions**

31  
32  
33 [All authors made a significant contribution to the conception and design of the study](#)  
34 [protocol.](#) The protocol was written by Drs. Savitz and W. Drevets and was critically  
35 reviewed by Drs. Preskorn, Teague, D. Drevets, and Yates. [All authors gave approval for](#)  
36 [the publication.](#)  
37  
38  
39  
40  
41

## 42 43 **Funding Statement**

44  
45 This work was funded by the Stanley Medical Research Institute, grant number 10T-  
46 1401. [The SMRI assisted with the study design but plays no role in the collection,](#)  
47 [management, analysis, and interpretation of data; writing of the report; or the decision to](#)  
48 [submit the report for publication.](#)  
49  
50  
51  
52  
53  
54

## 55 56 **Competing Interests**

None of the authors [has a](#) conflict of interest to declare.

## References

1. Correa R, Akiskal H, Gilmer W, Nierenberg AA, Trivedi M, Zisook S. Is unrecognized bipolar disorder a frequent contributor to apparent treatment resistant depression? *J Affect Disord* 2010;127(1-3):10-8.
2. Tohen M, Vieta E, Calabrese J, Ketter TA, Sachs G, Bowden C, et al. Efficacy of olanzapine and olanzapine-fluoxetine combination in the treatment of bipolar I depression. *Arch Gen Psychiatry* 2003;60(11):1079-88.
3. Nierenberg AA, Ostacher MJ, Calabrese JR, Ketter TA, Marangell LB, Miklowitz DJ, et al. Treatment-resistant bipolar depression: a STEP-BD equipose randomized effectiveness trial of antidepressant augmentation with lamotrigine, inositol, or risperidone. *Am J Psychiatry* 2006;163(2):210-6.
4. Nemeroff CB, Evans DL, Gyulai L, Sachs GS, Bowden CL, Gergel IP, et al. Double-blind, placebo-controlled comparison of imipramine and paroxetine in the treatment of bipolar depression. *Am J Psychiatry* 2001;158(6):906-12.
5. Mallinger AG, Frank E, Thase ME, Barwell MM, Diazgranados N, Luckenbaugh DA, et al. Revisiting the effectiveness of standard antidepressants in bipolar disorder: are monoamine oxidase inhibitors superior? *Psychopharmacol Bull* 2009;42(2):64-74.
6. Himmelhoch JM, Thase ME, Mallinger AG, Houck P. Tranylcypromine versus imipramine in anergic bipolar depression. *Am J Psychiatry* 1991;148(7):910-6.
7. Thase ME, Mallinger AG, McKnight D, Himmelhoch JM. Treatment of imipramine-resistant recurrent depression, IV: A double-blind crossover study of tranylcypromine for anergic bipolar depression. *Am J Psychiatry* 1992;149(2):195-8.
8. Savitz J, Drevets WC. Bipolar and major depressive disorder: neuroimaging the developmental-degenerative divide. *Neurosci Biobehav Rev* 2009;33(5):699-771.
9. Savitz JB, Drevets WC. Imaging phenotypes of major depressive disorder: genetic correlates. *Neuroscience* 2009;164(1):300-30.
10. Wang Y, Qin ZH. Molecular and cellular mechanisms of excitotoxic neuronal death. *Apoptosis* 2010;15(11):1382-402.
11. Mitchell ND, Baker GB. An update on the role of glutamate in the pathophysiology of depression. *Acta Psychiatr Scand* 2010;122(3):192-210.
12. Ryan B, Musazzi L, Mallei A, Tardito D, Gruber SH, El Khoury A, et al. Remodelling by early-life stress of NMDA receptor-dependent synaptic plasticity in a

- 1  
2  
3 gene-environment rat model of depression. *Int J Neuropsychopharmacol*  
4 2009;12(4):553-9.  
5  
6 13. Boyce-Rustay JM, Holmes A. Genetic inactivation of the NMDA receptor NR2A  
7 subunit has anxiolytic- and antidepressant-like effects in mice.  
8 *Neuropsychopharmacology* 2006;31(11):2405-14.  
9  
10 14. Tsunoka T, Kishi T, Ikeda M, Kitajima T, Yamanouchi Y, Kinoshita Y, et al.  
11 Association analysis of group II metabotropic glutamate receptor genes  
12 (GRM2 and GRM3) with mood disorders and fluvoxamine response in a  
13 Japanese population. *Prog Neuropsychopharmacol Biol Psychiatry*  
14 2009;33(5):875-9.  
15  
16 15. Diazgranados N, Ibrahim L, Brutsche NE, Newberg A, Kronstein P, Khalife S, et al.  
17 A randomized add-on trial of an N-methyl-D-aspartate antagonist in  
18 treatment-resistant bipolar depression. *Arch Gen Psychiatry* 2010;67(8):793-  
19 802.  
20  
21 16. Zarate CA, Jr., Payne JL, Quiroz J, Sporn J, Denicoff KK, Luckenbaugh D, et al. An  
22 open-label trial of riluzole in patients with treatment-resistant major  
23 depression. *Am J Psychiatry* 2004;161(1):171-4.  
24  
25 17. Dowlati Y, Herrmann N, Swardfager W, Liu H, Sham L, Reim EK, et al. A meta-  
26 analysis of cytokines in major depression. *Biol Psychiatry* 2010;67(5):446-57.  
27  
28 18. Pace TW, Miller AH. Cytokines and glucocorticoid receptor signaling. Relevance  
29 to major depression. *Ann N Y Acad Sci* 2009;1179:86-105.  
30  
31 19. Maes M, Scharpe S, Van Grootel L, Uyttenbroeck W, Cooreman W, Cosyns P, et al.  
32 Higher alpha 1-antitrypsin, haptoglobin, ceruloplasmin and lower retinol  
33 binding protein plasma levels during depression: further evidence for the  
34 existence of an inflammatory response during that illness. *J Affect Disord*  
35 1992;24(3):183-92.  
36  
37 20. Motivala SJ, Sarfatti A, Olmos L, Irwin MR. Inflammatory markers and sleep  
38 disturbance in major depression. *Psychosom Med* 2005;67(2):187-94.  
39  
40 21. Song C, Dinan T, Leonard BE. Changes in immunoglobulin, complement and  
41 acute phase protein levels in the depressed patients and normal controls. *J*  
42 *Affect Disord* 1994;30(4):283-8.  
43  
44 22. Tying S, Gottlieb A, Papp K, Gordon K, Leonardi C, Wang A, et al. Etanercept and  
45 clinical outcomes, fatigue, and depression in psoriasis: double-blind placebo-  
46 controlled randomised phase III trial. *Lancet* 2006;367(9504):29-35.  
47  
48 23. Drexhage RC, Knijff EM, Padmos RC, Heul-Nieuwenhuijzen L, Beumer W, Versnel  
49 MA, et al. The mononuclear phagocyte system and its cytokine inflammatory  
50 networks in schizophrenia and bipolar disorder. *Expert Rev Neurother*  
51 2010;10(1):59-76.  
52  
53 24. Leonard BE. The immune system, depression and the action of antidepressants.  
54 *Prog Neuropsychopharmacol Biol Psychiatry* 2001;25(4):767-80.  
55  
56 25. Dantzer R, O'Connor JC, Freund GG, Johnson RW, Kelley KW. From inflammation  
57 to sickness and depression: when the immune system subjugates the brain.  
58 *Nat Rev Neurosci* 2008;9(1):46-56.  
59  
60 26. Maes M. Depression is an inflammatory disease, but cell-mediated immune  
activation is the key component of depression. *Prog Neuropsychopharmacol*  
*Biol Psychiatry* 2010.



- 1  
2  
3  
4 27. Miller AH, Maletic V, Raison CL. Inflammation and its discontents: the role of  
5 cytokines in the pathophysiology of major depression. *Biol Psychiatry*  
6 2009;65(9):732-41.
- 7 28. Pariante CM, Pearce BD, Pisell TL, Sanchez CI, Po C, Su C, et al. The  
8 proinflammatory cytokine, interleukin-1alpha, reduces glucocorticoid  
9 receptor translocation and function. *Endocrinology* 1999;140(9):4359-66.
- 10 29. Ongur D, Drevets WC, Price JL. Glial reduction in the subgenual prefrontal cortex  
11 in mood disorders. *Proc Natl Acad Sci U S A* 1998;95(22):13290-5.
- 12 30. Raison CL, Dantzer R, Kelley KW, Lawson MA, Woolwine BJ, Vogt G, et al. CSF  
13 concentrations of brain tryptophan and kynurenines during immune  
14 stimulation with IFN-alpha: relationship to CNS immune responses and  
15 depression. *Mol Psychiatry* 2010;15(4):393-403.
- 16 31. Gabbay V, Klein RG, Katz Y, Mendoza S, Guttman LE, Alonso CM, et al. The  
17 possible role of the kynurenine pathway in adolescent depression with  
18 melancholic features. *J Child Psychol Psychiatry* 2010;51(8):935-43.
- 19 32. Padmos RC, Hillegers MH, Knijff EM, Vonk R, Bouvy A, Staal FJ, et al. A  
20 discriminating messenger RNA signature for bipolar disorder formed by an  
21 aberrant expression of inflammatory genes in monocytes. *Arch Gen*  
22 *Psychiatry* 2008;65(4):395-407.
- 23 33. Zemke D, Majid A. The potential of minocycline for neuroprotection in human  
24 neurologic disease. *Clin Neuropharmacol* 2004;27(6):293-8.
- 25 34. Elewa HF, Hilali H, Hess DC, Machado LS, Fagan SC. Minocycline for short-term  
26 neuroprotection. *Pharmacotherapy* 2006;26(4):515-21.
- 27 35. Hailer NP. Immunosuppression after traumatic or ischemic CNS damage: it is  
28 neuroprotective and illuminates the role of microglial cells. *Prog Neurobiol*  
29 2008;84(3):211-33.
- 30 36. Pae CU, Marks DM, Han C, Patkar AA. Does minocycline have antidepressant  
31 effect? *Biomed Pharmacother* 2008;62(5):308-11.
- 32 37. Wang J, Wei Q, Wang CY, Hill WD, Hess DC, Dong Z. Minocycline up-regulates Bcl-  
33 2 and protects against cell death in mitochondria. *J Biol Chem*  
34 2004;279(19):19948-54.
- 35 38. Chen G, Zeng WZ, Yuan PX, Huang LD, Jiang YM, Zhao ZH, et al. The mood-  
36 stabilizing agents lithium and valproate robustly increase the levels of the  
37 neuroprotective protein bcl-2 in the CNS. *J Neurochem* 1999;72(2):879-82.
- 38 39. Kosten TA, Galloway MP, Duman RS, Russell DS, D'Sa C. Repeated unpredictable  
39 stress and antidepressants differentially regulate expression of the bcl-2  
40 family of apoptotic genes in rat cortical, hippocampal, and limbic brain  
41 structures. *Neuropsychopharmacology* 2008;33(7):1545-58.
- 42 40. Youle RJ, Strasser A. The BCL-2 protein family: opposing activities that mediate  
43 cell death. *Nat Rev Mol Cell Biol* 2008;9(1):47-59.
- 44 41. Bailey MT, Dowd SE, Galley JD, Hufnagle AR, Allen RG, Lyte M. Exposure to a  
45 social stressor alters the structure of the intestinal microbiota: implications  
46 for stressor-induced immunomodulation. *Brain, behavior, and immunity*  
47 2011;25(3):397-407.
- 48  
49  
50  
51  
52  
53  
54  
55  
56  
57  
58  
59  
60



- 1  
2  
3  
4  
5  
6  
7  
8  
9  
10  
11  
12  
13  
14  
15  
16  
17  
18  
19  
20  
21  
22  
23  
24  
25  
26  
27  
28  
29  
30  
31  
32  
33  
34  
35  
36  
37  
38  
39  
40  
41  
42  
43  
44  
45  
46  
47  
48  
49  
50  
51  
52  
53  
54  
55  
56  
57  
58  
59  
60
42. Tikka T, Fiebich BL, Goldsteins G, Keinanen R, Koistinaho J. Minocycline, a tetracycline derivative, is neuroprotective against excitotoxicity by inhibiting activation and proliferation of microglia. *J Neurosci* 2001;21(8):2580-8.
43. Cornet S, Spinnewyn B, Delaflotte S, Charnet C, Roubert V, Favre C, et al. Lack of evidence of direct mitochondrial involvement in the neuroprotective effect of minocycline. *Eur J Pharmacol* 2004;505(1-3):111-9.
44. Yrjanheikki J, Keinanen R, Pellikka M, Hokfelt T, Koistinaho J. Tetracyclines inhibit microglial activation and are neuroprotective in global brain ischemia. *Proc Natl Acad Sci U S A* 1998;95(26):15769-74.
45. Sanchez Mejia RO, Ona VO, Li M, Friedlander RM. Minocycline reduces traumatic brain injury-mediated caspase-1 activation, tissue damage, and neurological dysfunction. *Neurosurgery* 2001;48(6):1393-9; discussion 99-401.
46. Bilousova TV, Dansie L, Ngo M, Aye J, Charles JR, Ethell DW, et al. Minocycline promotes dendritic spine maturation and improves behavioural performance in the fragile X mouse model. *J Med Genet* 2009;46(2):94-102.
47. Stirling DP, Khodarahmi K, Liu J, McPhail LT, McBride CB, Steeves JD, et al. Minocycline treatment reduces delayed oligodendrocyte death, attenuates axonal dieback, and improves functional outcome after spinal cord injury. *J Neurosci* 2004;24(9):2182-90.
48. Zhang L, Shirayama Y, Shimizu E, Iyo M, Hashimoto K. Protective effects of minocycline on 3,4-methylenedioxymethamphetamine-induced neurotoxicity in serotonergic and dopaminergic neurons of mouse brain. *Eur J Pharmacol* 2006;544(1-3):1-9.
49. Greenwald RA, Moak SA, Ramamurthy NS, Golub LM. Tetracyclines suppress matrix metalloproteinase activity in adjuvant arthritis and in combination with flurbiprofen, ameliorate bone damage. *J Rheumatol* 1992;19(6):927-38.
50. Brundula V, Rewcastle NB, Metz LM, Bernard CC, Yong VW. Targeting leukocyte MMPs and transmigration: minocycline as a potential therapy for multiple sclerosis. *Brain* 2002;125(Pt 6):1297-308.
51. Zhu S, Stavrovskaya IG, Drozda M, Kim BY, Ona V, Li M, et al. Minocycline inhibits cytochrome c release and delays progression of amyotrophic lateral sclerosis in mice. *Nature* 2002;417(6884):74-8.
52. Wang X, Zhu S, Drozda M, Zhang W, Stavrovskaya IG, Cattaneo E, et al. Minocycline inhibits caspase-independent and -dependent mitochondrial cell death pathways in models of Huntington's disease. *Proc Natl Acad Sci U S A* 2003;100(18):10483-7.
53. Bonelli RM, Hodl AK, Hofmann P, Kapfhammer HP. Neuroprotection in Huntington's disease: a 2-year study on minocycline. *Int Clin Psychopharmacol* 2004;19(6):337-42.
54. O'Dell JR, Blakely KW, Mallek JA, Eckhoff PJ, Leff RD, Wees SJ, et al. Treatment of early seropositive rheumatoid arthritis: a two-year, double-blind comparison of minocycline and hydroxychloroquine. *Arthritis Rheum* 2001;44(10):2235-41.
55. Lampl Y, Boaz M, Gilad R, Lorberboym M, Dabby R, Rapoport A, et al. Minocycline treatment in acute stroke: an open-label, evaluator-blinded study. *Neurology* 2007;69(14):1404-10.

- 1  
2  
3  
4  
5  
6  
7  
8  
9  
10  
11  
12  
13  
14  
15  
16  
17  
18  
19  
20  
21  
22  
23  
24  
25  
26  
27  
28  
29  
30  
31  
32  
33  
34  
35  
36  
37  
38  
39  
40  
41  
42  
43  
44  
45  
46  
47  
48  
49  
50  
51  
52  
53  
54  
55  
56  
57  
58  
59  
60
56. Miyaoka T, Yasukawa R, Yasuda H, Hayashida M, Inagaki T, Horiguchi J. Possible antipsychotic effects of minocycline in patients with schizophrenia. *Prog Neuropsychopharmacol Biol Psychiatry* 2007;31(1):304-7.
  57. Miyaoka T, Yasukawa R, Yasuda H, Hayashida M, Inagaki T, Horiguchi J. Minocycline as adjunctive therapy for schizophrenia: an open-label study. *Clin Neuropharmacol* 2008;31(5):287-92.
  58. Levkovitz Y, Mendlovich S, Riwkes S, Braw Y, Levkovitch-Verbin H, Gal G, et al. A double-blind, randomized study of minocycline for the treatment of negative and cognitive symptoms in early-phase schizophrenia. *J Clin Psychiatry* 2010;71(2):138-49.
  59. Molina-Hernandez M, Tellez-Alcantara NP, Perez-Garcia J, Olivera-Lopez JI, Jaramillo-Jaimes MT. Antidepressant-like actions of minocycline combined with several glutamate antagonists. *Prog Neuropsychopharmacol Biol Psychiatry* 2008;32(2):380-6.
  60. Molina-Hernandez M, Tellez-Alcantara NP, Perez-Garcia J, Olivera-Lopez JI, Jaramillo-Jaimes MT. Desipramine or glutamate antagonists synergized the antidepressant-like actions of intra-nucleus accumbens infusions of minocycline in male Wistar rats. *Prog Neuropsychopharmacol Biol Psychiatry* 2008;32(7):1660-6.
  61. O'Connor JC, Lawson MA, Andre C, Moreau M, Lestage J, Castanon N, et al. Lipopolysaccharide-induced depressive-like behavior is mediated by indoleamine 2,3-dioxygenase activation in mice. *Mol Psychiatry* 2009;14(5):511-22.
  62. Levine J, Cholestoy A, Zimmerman J. Possible antidepressant effect of minocycline. *Am J Psychiatry* 1996;153(4):582.
  63. Cipollone F, Patrignani P, Greco A, Panara MR, Padovano R, Cuccurullo F, et al. Differential suppression of thromboxane biosynthesis by indobufen and aspirin in patients with unstable angina. *Circulation* 1997;96(4):1109-16.
  64. Choi SH, Aid S, Bosetti F. The distinct roles of cyclooxygenase-1 and -2 in neuroinflammation: implications for translational research. *Trends Pharmacol Sci* 2009;30(4):174-81.
  65. Choi SH, Aid S, Choi U, Bosetti F. Cyclooxygenases-1 and -2 differentially modulate leukocyte recruitment into the inflamed brain. *Pharmacogenomics J* 2010;10(5):448-57.
  66. Choi SH, Bosetti F. Cyclooxygenase-1 null mice show reduced neuroinflammation in response to beta-amyloid. *Aging (Albany NY)* 2009;1(2):234-44.
  67. Bosetti F, Weerasinghe GR, Rosenberger TA, Rapoport SI. Valproic acid down-regulates the conversion of arachidonic acid to eicosanoids via cyclooxygenase-1 and -2 in rat brain. *J Neurochem* 2003;85(3):690-6.
  68. Weerasinghe GR, Rapoport SI, Bosetti F. The effect of chronic lithium on arachidonic acid release and metabolism in rat brain does not involve secretory phospholipase A2 or lipoxygenase/cytochrome P450 pathways. *Brain Res Bull* 2004;63(6):485-9.

- 1  
2  
3  
4  
5  
6  
7  
8  
9  
10  
11  
12  
13  
14  
15  
16  
17  
18  
19  
20  
21  
22  
23  
24  
25  
26  
27  
28  
29  
30  
31  
32  
33  
34  
35  
36  
37  
38  
39  
40  
41  
42  
43  
44  
45  
46  
47  
48  
49  
50  
51  
52  
53  
54  
55  
56  
57  
58  
59  
60
69. Ramadan E, Basselin M, Rao JS, Chang L, Chen M, Ma K, et al. Lamotrigine blocks NMDA receptor-initiated arachidonic acid signalling in rat brain: implications for its efficacy in bipolar disorder. *Int J Neuropsychopharmacol* 2011;1-13.
70. Stolk P, Souverein PC, Wilting I, Leufkens HG, Klein DF, Rapoport SI, et al. Is aspirin useful in patients on lithium? A pharmacoepidemiological study related to bipolar disorder. *Prostaglandins Leukot Essent Fatty Acids* 2010;82(1):9-14.
71. Phelan KM, Mosholder AD, Lu S. Lithium interaction with the cyclooxygenase 2 inhibitors rofecoxib and celecoxib and other nonsteroidal anti-inflammatory drugs. *J Clin Psychiatry* 2003;64(11):1328-34.
72. Mendlewicz J, Kriwin P, Oswald P, Souery D, Alboni S, Brunello N. Shortened onset of action of antidepressants in major depression using acetylsalicylic acid augmentation: a pilot open-label study. *Int Clin Psychopharmacol* 2006;21(4):227-31.
73. Ketterer MW, Brymer J, Rhoads K, Kraft P, Lovallo WR. Is aspirin, as used for antithrombosis, an emotion-modulating agent? *J Psychosom Res* 1996;40(1):53-8.
74. Nery FG, Monkul ES, Hatch JP, Fonseca M, Zunta-Soares GB, Frey BN, et al. Celecoxib as an adjunct in the treatment of depressive or mixed episodes of bipolar disorder: a double-blind, randomized, placebo-controlled study. *Hum Psychopharmacol* 2008;23(2):87-94.
75. Muller N, Schwarz MJ, Dehning S, Douhe A, Cerovecky A, Goldstein-Muller B, et al. The cyclooxygenase-2 inhibitor celecoxib has therapeutic effects in major depression: results of a double-blind, randomized, placebo controlled, add-on pilot study to reboxetine. *Mol Psychiatry* 2006;11(7):680-4.
76. Akhondzadeh S, Jafari S, Raisi F, Nasehi AA, Ghoreishi A, Salehi B, et al. Clinical trial of adjunctive celecoxib treatment in patients with major depression: a double blind and placebo controlled trial. *Depress Anxiety* 2009;26(7):607-11.
77. Maier SF. Bi-directional immune-brain communication: Implications for understanding stress, pain, and cognition. *Brain Behav Immun* 2003;17(2):69-85.
78. Howren MB, Lamkin DM, Suls J. Associations of depression with C-reactive protein, IL-1, and IL-6: a meta-analysis. *Psychosom Med* 2009;71(2):171-86.
79. Renner U, De Santana EC, Gerez J, Frohlich B, Haedo M, Pereda MP, et al. Intrapituitary expression and regulation of the gp130 cytokine interleukin-6 and its implication in pituitary physiology and pathophysiology. *Ann N Y Acad Sci* 2009;1153:89-97.
80. Mallinckrodt CH, Clark WS, David SR. Accounting for dropout bias using mixed-effects models. *J Biopharm Stat* 2001;11(1-2):9-21.
81. Siddiqui O, Hung HM, O'Neill R. MMRM vs. LOCF: a comprehensive comparison based on simulation study and 25 NDA datasets. *J Biopharm Stat* 2009;19(2):227-46.
82. Meier-Ewert HK, Ridker PM, Rifai N, Price N, Dinges DF, Mullington JM. Absence of diurnal variation of C-reactive protein concentrations in healthy human subjects. *Clin Chem* 2001;47(3):426-30.

- 1  
2  
3  
4 83. Vgontzas AN, Bixler EO, Lin HM, Prolo P, Trakada G, Chrousos GP. IL-6 and its  
5 circadian secretion in humans. *Neuroimmunomodulation* 2005;12(3):131-40.
- 6 84. Nierenberg AA, DeCecco LM. Definitions of antidepressant treatment response,  
7 remission, nonresponse, partial response, and other relevant outcomes: a  
8 focus on treatment-resistant depression. *J Clin Psychiatry* 2001;62 Suppl  
9 16:5-9.
- 10 85. Rief W, Nestoriuc Y, Weiss S, Welzel E, Barsky AJ, Hofmann SG. Meta-analysis of  
11 the placebo response in antidepressant trials. *J Affect Disord* 2009;118(1-  
12 3):1-8.
- 13 86. Goldberg JF, Perlis RH, Ghaemi SN, Calabrese JR, Bowden CL, Wisniewski S, et al.  
14 Adjunctive antidepressant use and symptomatic recovery among bipolar  
15 depressed patients with concomitant manic symptoms: findings from the  
16 STEP-BD. *Am J Psychiatry* 2007;164(9):1348-55.
- 17 87. Gordon PH, Moore DH, Gelinas DF, Qualls C, Meister ME, Werner J, et al. Placebo-  
18 controlled phase I/II studies of minocycline in amyotrophic lateral sclerosis.  
19 *Neurology* 2004;62(10):1845-7.
- 20 88. Collaborative meta-analysis of randomised trials of antiplatelet therapy for  
21 prevention of death, myocardial infarction, and stroke in high risk patients.  
22 *BMJ* 2002;324(7329):71-86.
- 23 89. Fries S, Grosser T. The cardiovascular pharmacology of COX-2 inhibition.  
24 *Hematology Am Soc Hematol Educ Program* 2005:445-51.
- 25 90. Grosser T, Yu Y, Fitzgerald GA. Emotion recollected in tranquility: lessons  
26 learned from the COX-2 saga. *Annu Rev Med* 2010;61:17-33.
- 27 91. Patrono C, Collier B, FitzGerald GA, Hirsh J, Roth G. Platelet-active drugs: the  
28 relationships among dose, effectiveness, and side effects: the Seventh ACCP  
29 Conference on Antithrombotic and Thrombolytic Therapy. *Chest* 2004;126(3  
30 Suppl):234S-64S.
- 31 92. Hansson L, Zanchetti A, Carruthers SG, Dahlof B, Elmfeldt D, Julius S, et al. Effects  
32 of intensive blood-pressure lowering and low-dose aspirin in patients with  
33 hypertension: principal results of the Hypertension Optimal Treatment  
34 (HOT) randomised trial. HOT Study Group. *Lancet* 1998;351(9118):1755-62.
- 35 93. Zanchetti A, Hansson L, Leonetti G, Rahn KH, Ruilope L, Warnold I, et al. Low-  
36 dose aspirin does not interfere with the blood pressure-lowering effects of  
37 antihypertensive therapy. *J Hypertens* 2002;20(5):1015-22.
- 38 94. Teo KK, Yusuf S, Pfeffer M, Torp-Pedersen C, Kober L, Hall A, et al. Effects of long-  
39 term treatment with angiotensin-converting-enzyme inhibitors in the  
40 presence or absence of aspirin: a systematic review. *Lancet*  
41 2002;360(9339):1037-43.
- 42 95. De Angelis C, Drazen JM, Frizelle FA, Haug C, Hoey J, Horton R, et al. Clinical trial  
43 registration: a statement from the International Committee of Medical  
44 Journal Editors. *N Engl J Med* 2004;351(12):1250-1.
- 45  
46  
47  
48  
49  
50  
51  
52  
53  
54  
55  
56  
57  
58  
59  
60

1  
2  
3  
4  
5  
6  
7  
8  
9  
10  
11  
12  
13  
14  
15  
16  
17  
18  
19  
20  
21  
22  
23  
24  
25  
26  
27  
28  
29  
30  
31  
32  
33  
34  
35  
36  
37  
38  
39  
40  
41  
42  
43  
44  
45  
46  
47  
48  
49  
50  
51  
52  
53  
54  
55  
56  
57  
58  
59  
60

For peer review only

1  
2  
3  
4  
5  
6  
7  
8  
9  
10  
11  
12  
13  
14  
15  
16  
17  
18  
19  
20  
21  
22  
23  
24  
25  
26  
27  
28  
29  
30  
31  
32  
33  
34  
35  
36  
37  
38  
39  
40  
41  
42  
43  
44  
45  
46  
47  
48  
49  
50  
51  
52  
53  
54  
55  
56  
57  
58  
59  
60

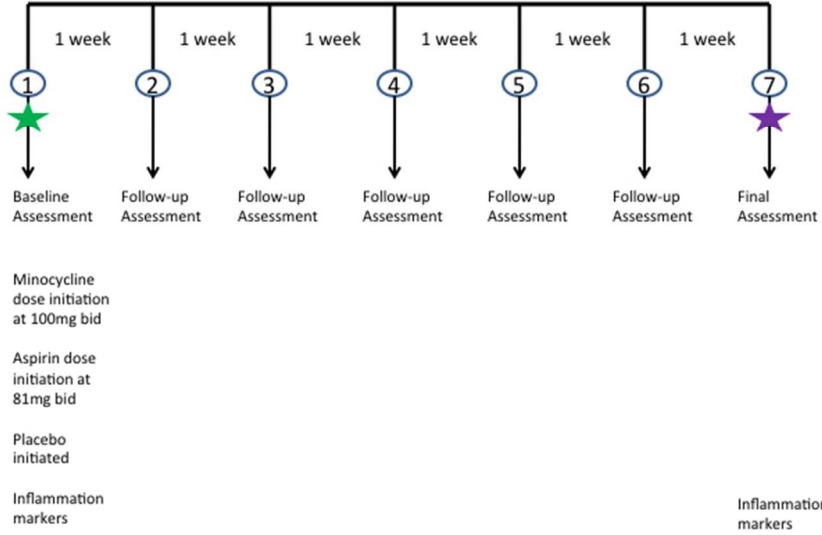

254x190mm (72 x 72 DPI)

ew only



**THE FOLLOWING WERE APPROVED**

**INVESTIGATOR:** Wayne Drevets M.D.  
6655 South Yale Avenue  
Tulsa, Oklahoma 74136

**BOARD ACTION DATE:** 08/22/2011  
**PANEL:** 6  
**STUDY APPROVAL EXPIRES:** 08/05/2012  
**STUDY NUM:** 1126576  
**WIRB PRO NUM:** 20111159  
**INVEST NUM:** 160921  
**WO NUM:** 1-683377-1  
**CONTINUING REVIEW:** Annually  
**SITE STATUS REPORTING:** Semi-Annual

**SPONSOR:** Laureate Institute for Brain Research (LIBR)  
**PROTOCOL NUM:** 2011-002-00  
**AMD. PRO. NUM:**  
**TITLE:**  
MINOCYCLINE AND ASPIRIN IN THE TREATMENT OF BIPOLAR DEPRESSION

**APPROVAL INCLUDES:**  
Subject Information Sheet - Visit Five #9212383.0 - As Submitted  
Subject Information Sheet - Visit Four #9212382.0 - As Submitted  
Subject Information Sheet - Visit One #9212379.0 - As Submitted  
Subject Information Sheet - Visit Six #9212384.0 - As Submitted  
Subject Information Sheet - Visit Three #9212381.0 - As Submitted  
Subject Information Sheet - Visit Two #9212380.0 - As Submitted  
Consent Form [IN1]

**WIRB APPROVAL IS GRANTED SUBJECT TO:**  
**RE-CONSENTING INSTRUCTIONS:** Subjects currently enrolled are not required to sign the enclosed version(s) of the consent form(s). All subjects who will be enrolled in the future for this study must sign the most current WIRB-approved consent form(s).

**WIRB HAS APPROVED THE FOLLOWING LOCATIONS TO BE USED IN THE RESEARCH:**  
Laureate Institute for Brain Research, 6655 South Yale Avenue, Tulsa, Oklahoma 74136  
University of Kansas Medical Center Research Institute, 8911 East Orme, Wichita, Kansas 67207

**If the PI has an obligation to use another IRB for any site listed above and has not submitted a written statement from the other IRB acknowledging WIRB's review of this research, please contact WIRB's Client Services department.**

IF YOU HAVE ANY QUESTIONS, CONTACT WIRB AT 1-800-562-4789

This is to certify that the information contained herein is true and correct as reflected in the records of the Western Institutional Review Board (WIRB), OHRP/FDA parent organization number IORG 0000432, IRB registration number IRB00000533. WE CERTIFY THAT WIRB IS IN FULL COMPLIANCE WITH GOOD CLINICAL PRACTICES AS DEFINED UNDER THE U.S. FOOD AND DRUG ADMINISTRATION (FDA) REGULATIONS, U.S. DEPARTMENT OF HEALTH AND HUMAN SERVICES (HHS) REGULATIONS, AND THE INTERNATIONAL CONFERENCE ON HARMONISATION (ICH) GUIDELINES.

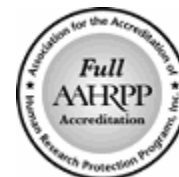

*Robert A Taylor for*

Theodore D. Schultz, J.D., Chairman

8/23/2011

(Date)

This document electronically reviewed and approved by Taylor, Robert on 8/23/2011 1:46:33 PM PST. For more information call Client Services at 1-360-252-2500.  
**For peer review only - <http://bmjopen.bmj.com/site/about/guidelines.xhtml>**



**ALL WIRB APPROVED INVESTIGATORS MUST COMPLY WITH THE FOLLOWING:**

1. Conduct the research in accordance with the protocol, applicable laws and regulations, and the principles of research ethics as set forth in the Belmont Report.
2. Although a participant is not obliged to give his or her reasons for withdrawing prematurely from the clinical trial, the investigator should make a reasonable effort to ascertain the reason, while fully respecting the participant's rights.
3. Unless consent has been waived, conduct the informed consent process without coercion or undue influence, and provide the potential subject sufficient opportunity to consider whether or not to participate. (Due to the unique circumstances of research conducted at international sites outside the United States and Canada where WIRB approved materials are translated into the local language, the following requirements regarding consent forms bearing the WIRB approval stamp and regarding certification of translations are not applicable.)
  - a. Use only the most current consent form bearing the WIRB "APPROVED" stamp.
  - b. Provide non-English speaking subjects with a certified translation of the approved consent form in the subject's first language. The translation must be approved by WIRB.
  - c. Obtain pre-approval from WIRB for use of recruitment materials and other materials provided to subjects.

4. Obtain pre-approval from WIRB for changes in research.

5. Obtain pre-approval from WIRB for planned deviations and changes in research activity as follows:

If this research is federally funded or conducted under an FWA, obtain pre-approval from WIRB for all planned deviations and changes in research activity, except where necessary to eliminate apparent immediate hazards to the human subjects. OHRP considers all planned protocol deviations to be changes in research that need prior IRB review and approval.

If this research is **not** federally funded and **not** conducted under an FWA, obtain pre-approval from WIRB for any planned deviations that could adversely affect the rights, safety or welfare of subjects, or the integrity of the research data and any changes in the research activity, except where necessary to eliminate apparent immediate hazards to the human subjects. FDA has not adopted the policy that all planned protocol deviations are changes in research that need prior IRB review and approval.

Deviations necessary to eliminate apparent immediate hazards to the human subjects should be reported within 10 days.

6. Promptly report to WIRB all unanticipated problems (adverse events, protocol deviations and violations and other problems) that meet all of the following criteria:
  - a. Unexpected (in terms of nature, severity or frequency);
  - b. Related or possibly related to participation in the research; and
  - c. Suggests that the research places subjects or others at a greater risk of harm than was previously known or recognized.

Please go to [www.wirb.com](http://www.wirb.com) for complete definitions and forms for reporting.

7. Provide reports to WIRB concerning the progress of the research, when requested.
8. Ensure that prior to performing study-related duties, each member of the research study team has had training in the protection of human subjects appropriate to the processes required in the approved protocol.

**Federal regulations require that WIRB conduct continuing review of approved research. You will receive Continuing Review Report forms from WIRB. These reports must be returned even though your study may not have started.**

1  
2 **DISTRIBUTION OF COPIES:**

3 **Contact, Company**

4 Karen Blackwell M.S., University of Kansas Medical Center

5 Rebecca Fears, Laureate Institute for Brain Research

6 Wayne Drevets M.D., Laureate Institute for Brain Research

7  
8  
9  
10  
11  
12  
13  
14  
15  
16  
17  
18  
19  
20  
21  
22  
23  
24  
25  
26  
27  
28  
29  
30  
31  
32  
33  
34  
35  
36  
37  
38  
39  
40  
41  
42  
43  
44  
45  
46  
47  
48  
49  
50  
51  
52  
53  
54  
55  
56  
57  
58  
59  
60

For peer review only

1  
2  
3  
4  
5  
6  
7  
8  
9  
10  
11  
12  
13  
14  
15  
16  
17  
18  
19  
20  
21  
22  
23  
24  
25  
26  
27  
28  
29  
30  
31  
32  
33  
34  
35  
36  
37  
38  
39  
40  
41  
42  
43  
44  
45  
46  
47  
48  
49

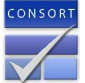

# CONSORT 2010 checklist of information to include when reporting a randomised trial\*

| Section/Topic                    | Item No | Checklist item                                                                                                                                                                              | Reported on page No |
|----------------------------------|---------|---------------------------------------------------------------------------------------------------------------------------------------------------------------------------------------------|---------------------|
| <b>Title and abstract</b>        |         |                                                                                                                                                                                             |                     |
|                                  | 1a      | Identification as a randomised trial in the title                                                                                                                                           | 1                   |
|                                  | 1b      | Structured summary of trial design, methods, results, and conclusions (for specific guidance see CONSORT for abstracts)                                                                     | 2                   |
| <b>Introduction</b>              |         |                                                                                                                                                                                             |                     |
| Background and objectives        | 2a      | Scientific background and explanation of rationale                                                                                                                                          | 3-13                |
|                                  | 2b      | Specific objectives or hypotheses                                                                                                                                                           | 20                  |
| <b>Methods</b>                   |         |                                                                                                                                                                                             |                     |
| Trial design                     | 3a      | Description of trial design (such as parallel, factorial) including allocation ratio                                                                                                        | 14-15               |
|                                  | 3b      | Important changes to methods after trial commencement (such as eligibility criteria), with reasons                                                                                          | NA                  |
| Participants                     | 4a      | Eligibility criteria for participants                                                                                                                                                       | 13-14               |
|                                  | 4b      | Settings and locations where the data were collected                                                                                                                                        | 17                  |
| Interventions                    | 5       | The interventions for each group with sufficient details to allow replication, including how and when they were actually administered                                                       | 15-16               |
| Outcomes                         | 6a      | Completely defined pre-specified primary and secondary outcome measures, including how and when they were assessed                                                                          | 20-21               |
|                                  | 6b      | Any changes to trial outcomes after the trial commenced, with reasons                                                                                                                       | NA                  |
| Sample size                      | 7a      | How sample size was determined                                                                                                                                                              | 21                  |
|                                  | 7b      | When applicable, explanation of any interim analyses and stopping guidelines                                                                                                                | 30                  |
| <b>Randomisation:</b>            |         |                                                                                                                                                                                             |                     |
| Sequence generation              | 8a      | Method used to generate the random allocation sequence                                                                                                                                      | 15                  |
|                                  | 8b      | Type of randomisation; details of any restriction (such as blocking and block size)                                                                                                         |                     |
| Allocation concealment mechanism | 9       | Mechanism used to implement the random allocation sequence (such as sequentially numbered containers), describing any steps taken to conceal the sequence until interventions were assigned | 15                  |
| Implementation                   | 10      | Who generated the random allocation sequence, who enrolled participants, and who assigned participants to interventions                                                                     | 15                  |
| Blinding                         | 11a     | If done, who was blinded after assignment to interventions (for example, participants, care providers, those                                                                                | 15                  |

|    |                          |                                                                                                                     |       |
|----|--------------------------|---------------------------------------------------------------------------------------------------------------------|-------|
| 1  |                          |                                                                                                                     |       |
| 2  |                          | assessing outcomes) and how                                                                                         |       |
| 3  |                          |                                                                                                                     |       |
| 4  |                          | 11b If relevant, description of the similarity of interventions                                                     |       |
| 5  | Statistical methods      | 12a Statistical methods used to compare groups for primary and secondary outcomes                                   | 20-21 |
| 6  |                          | 12b Methods for additional analyses, such as subgroup analyses and adjusted analyses                                | 20-21 |
| 7  |                          |                                                                                                                     |       |
| 8  | <b>Results</b>           |                                                                                                                     |       |
| 9  | Participant flow (a      | 13a For each group, the numbers of participants who were randomly assigned, received intended treatment, and        |       |
| 10 | diagram is strongly      | were analysed for the primary outcome                                                                               |       |
| 11 | recommended)             | 13b For each group, losses and exclusions after randomisation, together with reasons                                |       |
| 12 | Recruitment              | 14a Dates defining the periods of recruitment and follow-up                                                         |       |
| 13 |                          | 14b Why the trial ended or was stopped                                                                              |       |
| 14 |                          |                                                                                                                     |       |
| 15 | Baseline data            | 15 A table showing baseline demographic and clinical characteristics for each group                                 |       |
| 16 | Numbers analysed         | 16 For each group, number of participants (denominator) included in each analysis and whether the analysis was      |       |
| 17 |                          | by original assigned groups                                                                                         |       |
| 18 |                          |                                                                                                                     |       |
| 19 | Outcomes and             | 17a For each primary and secondary outcome, results for each group, and the estimated effect size and its           |       |
| 20 | estimation               | precision (such as 95% confidence interval)                                                                         |       |
| 21 |                          | 17b For binary outcomes, presentation of both absolute and relative effect sizes is recommended                     |       |
| 22 | Ancillary analyses       | 18 Results of any other analyses performed, including subgroup analyses and adjusted analyses, distinguishing       |       |
| 23 |                          | pre-specified from exploratory                                                                                      |       |
| 24 |                          |                                                                                                                     |       |
| 25 | Harms                    | 19 All important harms or unintended effects in each group (for specific guidance see CONSORT for harms)            |       |
| 26 |                          |                                                                                                                     |       |
| 27 | <b>Discussion</b>        |                                                                                                                     |       |
| 28 | Limitations              | 20 Trial limitations, addressing sources of potential bias, imprecision, and, if relevant, multiplicity of analyses |       |
| 29 | Generalisability         | 21 Generalisability (external validity, applicability) of the trial findings                                        |       |
| 30 | Interpretation           | 22 Interpretation consistent with results, balancing benefits and harms, and considering other relevant evidence    |       |
| 31 |                          |                                                                                                                     |       |
| 32 | <b>Other information</b> |                                                                                                                     |       |
| 33 | Registration             | 23 Registration number and name of trial registry                                                                   | 1, 30 |
| 34 | Protocol                 | 24 Where the full trial protocol can be accessed, if available                                                      | 19    |
| 35 | Funding                  | 25 Sources of funding and other support (such as supply of drugs), role of funders                                  |       |
| 36 |                          |                                                                                                                     |       |

37

38 \*We strongly recommend reading this statement in conjunction with the CONSORT 2010 Explanation and Elaboration for important clarifications on all the items. If relevant, we also

39 recommend reading CONSORT extensions for cluster randomised trials, non-inferiority and equivalence trials, non-pharmacological treatments, herbal interventions, and pragmatic trials.

40 Additional extensions are forthcoming: for those and for up to date references relevant to this checklist, see [www.consort-statement.org](http://www.consort-statement.org).

41

42

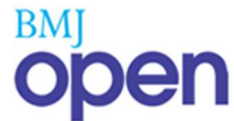

**MINOCYCLINE AND ASPIRIN IN THE TREATMENT OF  
BIPOLAR DEPRESSION: a protocol for a proof-of-concept  
randomized, double-blind, placebo-controlled, 2x2, clinical  
trial**

|                                    |                                                                                                                      |
|------------------------------------|----------------------------------------------------------------------------------------------------------------------|
| Journal:                           | <i>BMJ Open</i>                                                                                                      |
| Manuscript ID:                     | bmjopen-2011-000643.R2                                                                                               |
| Article Type:                      | Protocol                                                                                                             |
| Date Submitted by the Author:      | 23-Jan-2012                                                                                                          |
| Complete List of Authors:          | Savitz, Jonathan; LIBR,<br>Preskorn, Sheldon<br>Teague, Kent<br>Drevets, Douglas<br>Yates, William<br>Drevets, Wayne |
| <b>Primary Subject<br>Heading</b>: | Mental health                                                                                                        |
| Secondary Subject Heading:         | Pharmacology & therapeutics, Mental health                                                                           |
| Keywords:                          | Depression & mood disorders < PSYCHIATRY, Schizophrenia & psychotic disorders < PSYCHIATRY, CLINICAL PHARMACOLOGY    |
|                                    |                                                                                                                      |

SCHOLARONE™  
Manuscripts

1  
2  
3  
4  
5  
6  
7  
8  
9  
10  
11  
12  
13  
14  
15  
16  
17  
18  
19  
20  
21  
22  
23  
24  
25  
26  
27  
28  
29  
30  
31  
32  
33  
34  
35  
36  
37  
38  
39  
40  
41  
42  
43  
44  
45  
46  
47  
48  
49  
50  
51  
52  
53  
54  
55  
56  
57  
58  
59  
60

**MINOCYCLINE AND ASPIRIN IN THE TREATMENT OF  
BIPOLAR DEPRESSION: a protocol for a proof-of-concept  
randomized, double-blind, placebo-controlled, 2x2, clinical trial**

Jonathan Savitz<sup>1,2</sup>, Ph.D., Sheldon H. Preskorn<sup>3</sup>, M.D., T. Kent Teague<sup>4</sup>,  
Ph.D., Douglas A. Drevets<sup>5</sup>, M.D., William Yates<sup>1</sup>, M.D., Wayne C.  
Drevets<sup>1,6\*</sup>, M.D.

Word Count = 8,424

Table = 1

Figures = 1

<sup>1</sup> Laureate Institute for Brain Research (LIBR), Tulsa, OK 74136, USA

<sup>2</sup> University of Tulsa, Tulsa, OK 74104, USA

<sup>3</sup> University of Kansas Clinical Research Institute, Wichita, KS 67214, USA

<sup>4</sup> Departments of Surgery and Psychiatry, University of Oklahoma College of Medicine, Tulsa,  
Department of Pharmaceutical Sciences, University of Oklahoma College of Pharmacy,  
Department of Microbiology and Biochemistry, Oklahoma State University Center for Health  
Sciences, Tulsa, OK 74135, USA

<sup>5</sup> Department of Medicine, Oklahoma University Health Sciences Center, and the Oklahoma City  
VAMC, Oklahoma City, OK 73014, USA

<sup>6</sup> Department of Psychiatry, University of Oklahoma College of Medicine, Tulsa, OK 74135,  
USA

\* Corresponding Author

[wdrevets@laureateinstitute.org](mailto:wdrevets@laureateinstitute.org)

LIBR

6655 South Yale Ave

Tulsa, OK 74136

Tel: 918 502 5102

Fax: 918 502 5135

**Key Words**

Bipolar Depression, Clinical Trial, Minocycline, Aspirin, Inflammation

## ABSTRACT

**Introduction:** New medication classes are needed to improve treatment effectiveness in the depressed phase of bipolar disorder (BD). Extant evidence suggests that BD is characterized by neural changes such as dendritic remodeling and glial and neuronal cell loss. These changes have been hypothesized to result from chronic inflammation. The principal aims of the proposed research is to evaluate the antidepressant efficacy in bipolar depression of minocycline, a drug with neuroprotective and immune-modulating properties, and of aspirin, at doses expected to selectively inhibit cyclooxygenase 1 (COX-1). **Methods and Analysis:** One hundred and twenty outpatients between 18 and 55 years of age, who meet DSM-IV-TR criteria for BD (type I or II) and for a current major depressive episode will be recruited to take part in a randomized, double-blind, placebo-controlled, parallel-group, proof-of-concept, clinical trial following a 2 x 2 design. As adjuncts to existing treatment, subjects will be randomized to receive one of four treatment combinations: placebo-minocycline plus placebo-aspirin, active-minocycline plus placebo-aspirin, placebo-minocycline plus active-aspirin, or active-minocycline plus active-aspirin. The dose of minocycline and aspirin is 100mg bid and 81mg bid, respectively. Antidepressant response will be evaluated by assessing changes in the Montgomery-Asberg Depression Rating Scale (MADRS) scores between baseline and the end of the 6 week trial. As secondary outcome measures, the anti-inflammatory effects of minocycline and aspirin will be tested by measuring pre-and-post treatment levels of CRP and inflammatory cytokines. **Ethics and Dissemination:** Minocycline has been widely used as an antibiotic in doses up to 400 mg/day. Low dose aspirin has been safely used on a worldwide scale for its role as an anti-thrombotic and thrombolytic. The study progress will be overseen by a Data, Safety and Monitoring Board which will meet once every 6 months. Results of the study will be published in peer-reviewed publications. **Registration:** Clinical Trials.gov: NCT01429272.



## INTRODUCTION

The treatment of bipolar depression remains a major challenge for psychiatry. The US FDA has not approved any of the ~25 standard antidepressants for the treatment of bipolar depression, partly because these agents have not been robustly effective in BD patients<sup>1</sup>. Thus, currently approved treatments for bipolar depression include lithium, quetiapine, and the combination of olanzapine and fluoxetine<sup>2</sup>. Other treatments used include lamotrigine, conventional antidepressant agents, other atypical antipsychotics, pramipexole or riluzole (reviewed in <sup>3</sup>). Unfortunately, the effectiveness of these options also is limited. For example, in a placebo-controlled study in which subjects receiving lithium were randomized to receive either standard antidepressant pharmacotherapy (paroxetine or imipramine) or placebo, those receiving lithium plus an antidepressant did not show a significant improvement over those receiving lithium plus placebo<sup>4</sup>. Similarly, in the STEP-BD trial, 42 of 179 subjects (23.5%) receiving a mood stabilizer plus adjunctive antidepressant drug treatment had a durable recovery, which did not differ significantly from 51 of 187 subjects (27.3%) receiving mood stabilizer plus placebo. Mallinger et al. reported a similar durable recovery rate in BD depressives treated with mood stabilizer plus paroxetine (27%), but found a higher rate for adjunctive monoamine oxidase inhibitors (MAOIs; 53%)<sup>5</sup>, consistent with the findings of previous studies comparing MAOIs vs imipramine<sup>6,7</sup>. Unfortunately MAOIs are commonly unacceptable to patients.

New classes of antidepressant drugs are needed for bipolar depression. Existing agents exert their primary actions on monoaminergic systems. The efficacy of these agents contributed to the monoamine-deficiency hypothesis of depression, which continues to receive empirical support. Nevertheless, the field is in the early stages of a paradigm shift driven by evidence of dendritic remodeling and neuronal atrophy in animal models of depression, and of reductions in gray matter (GM) volume, and glial cell loss at *postmortem* in BD<sup>8</sup>. The neurotrophic effects of lithium, coupled with longitudinal studies demonstrating volumetric changes over time, raise the possibility that mood disorders are underpinned by a neurotoxic process<sup>8,9</sup>. The final common pathway through

1  
2  
3 which neurotoxic agents exert their effect is hypothesized to involve excess glutamatergic  
4 signaling<sup>10</sup>.  
5  
6

7  
8  
9 The glutamatergic model of mood disorders is based on the premise that excessive  
10 stimulation of NMDA-glutamatergic receptors, results in neuronal atrophy and apoptosis  
11 of glial and/or neuronal cells, and *ipso facto*, depression. Evidence for this hypothesis  
12 derives from multiple sources. In preclinical models, riluzole, which inhibits neuronal  
13 release of glutamate, ceftriaxone, which increases glutamate reuptake, and NMDA  
14 receptor antagonists such as ketamine, ameliorate behavioral analogs of depression<sup>11</sup>. In  
15 addition, rats bred to be genetically sensitive to stress show differential expression of  
16 NMDA receptors<sup>12</sup>, and behavioral analogs of depression are abrogated in NMDA  
17 receptor subunit knockout mice<sup>13</sup>. In humans, increased serum levels of glutamate that  
18 resolve with antidepressant treatment were reported in MDD, and extended to the CSF  
19 post mortem<sup>11</sup>. Polymorphisms of the metabotropic glutamate receptor genes, GRM2 and  
20 GRM3, and a haplotype of the glutamic acid decarboxylase (GAD2) gene were  
21 associated with MDD<sup>14</sup>. Finally, ketamine induced a rapid, sustained antidepressant  
22 effect in BD<sup>15 16</sup> and riluzole showed promising results in treatment-resistant depression<sup>15</sup>  
23  
24  
25  
26  
27  
28  
29  
30  
31  
32  
33  
34  
35  
36  
37  
38  
39  
40  
41  
42  
43  
44  
45  
46  
47  
48  
49  
50  
51  
52  
53  
54  
55  
56  
57  
58  
59  
60

One potential cause of the disruption in glutamatergic signaling in BD is dysregulation of  
the immune system. Increased levels of proinflammatory cytokines such as interleukin 6  
(IL-6), IL-1 $\beta$ , interferon alpha (IFN $\alpha$ ), tumor necrosis factor alpha (TNF- $\alpha$ )  
prostaglandinE2 (PGE2), and chemokine ligand 2 (CCL2) are consistently observed in  
the blood and CSF of patients with mood disorders, both at baseline and after exposure to  
stressors<sup>17 18</sup>. Elevated serum levels of (pro-inflammatory) positive acute-phase proteins  
(e.g., haptoglobin,  $\alpha$ 1-antitrypsin, ceruloplasmin, C-reactive protein), but reduced levels  
of negative acute-phase proteins (e.g., albumin and retinal-binding protein) also are  
reported in mood disorders<sup>19-21</sup>. Further, treatment of hepatitis C with IFN $\alpha$  is known to  
induce the major depressive syndrome and/or manic symptoms in approximately 40% of  
patients, and the efficacy of conventional antidepressant drugs is associated with a  
reduction in inflammation<sup>18</sup>. Moreover, anti-tumor necrosis factor (TNF) therapy (for

1  
2  
3 psoriasis) can improve mood<sup>22</sup>. Since proinflammatory cytokines can alter brain function,  
4 these data are compatible with evidence that an activated inflammatory response system  
5 exists in mood disorders which plays a role in their pathophysiology<sup>23-26</sup>.  
6  
7  
8  
9

10 The over-activity of the hypothalamic-pituitary-adrenal axis in mood disorders may play  
11 a role in inflammation, since hypersecretion of corticotrophin-releasing hormone (CRH)  
12 activates the transcription factor, nuclear factor kappa B (NF-κB). NF-κB regulates the  
13 expression of proinflammatory cytokines in immune cells in the CNS and periphery, and  
14 the expression of genes involved in apoptosis<sup>27</sup>. In addition, NF-κB may result in the  
15 expression of the class 1 major histocompatibility complex (MHC I), labeling cells for  
16 removal by cytotoxic T-cells<sup>27</sup>. Usually, cortisol suppresses this inflammatory response,  
17 but chronic stress appears to desensitize the glucocorticoid receptor (GR) and by  
18 extension, the anti-inflammatory effects of cortisol<sup>27</sup>. Cytokines play a role in  
19 desensitizing the system to cortisol. For example, IL1 and TNF-α retard dexamethasone-  
20 induced translocation of the GR receptor from the cytoplasm to the nucleus<sup>28</sup>.  
21  
22  
23  
24  
25  
26  
27  
28  
29  
30

31 The immunologic and glutamatergic models of BD are complementary because a  
32 proinflammatory state is one potential cause of excitotoxicity<sup>27</sup>. Peripheral inflammatory  
33 signals activate microglia in the brain, inducing an inflammatory cascade of cytokines  
34 and free radicals. Cytokines and reactive oxygen and nitrogen species exert a direct toxic,  
35 apoptotic effect on oligodendrocytes. Potentially through the loss of oligodendrocytes,  
36 oxidative stress can lead to demyelination. Such a process conceivably may account for  
37 the reduction in oligodendroglia found *postmortem* in the prefrontal cortex<sup>29</sup> in mood  
38 disorders. The inflammatory milieu also compromises astrocyte function, leading to  
39 down-regulation of glutamate transporters and impaired glutamate reuptake into  
40 astrocytes, further amplifying inflammatory signaling<sup>27</sup>.  
41  
42  
43  
44  
45  
46  
47  
48  
49  
50

51 In addition, cytokines such as interleukin 1 (IL-1), IL-6, and TNF-α activate indoleamine  
52 2, 3-dioxygenase (IDO). IDO catalyzes the breakdown of tryptophan, the amino-acid  
53 precursor of serotonin, and an important regulator of T-cell function, into kynurenine  
54 (Kyn)<sup>30</sup>. Activation of the Kyn pathway shunts tryptophan away from 5-HT synthesis,  
55  
56  
57  
58  
59  
60

1  
2  
3 putatively reducing serotonergic transmission. Kyn is in turn metabolized into quinolinic  
4 acid (Quin), a potent NMDA receptor agonist, and neuromodulator involved in lipid  
5 peroxidation, which can induce neuronal damage via oxidative stress and overstimulation  
6 of NMDA receptors<sup>30</sup>. Consistent with inflammation-related shunt towards Kyn  
7 metabolism, the plasma tryptophan-Kyn ratio was found to correlate inversely with  
8 striatal total choline (a putative cell membrane turnover biomarker) in adolescents with  
9 melancholic depression<sup>31</sup>.  
10  
11  
12  
13  
14  
15  
16

17  
18 The mRNA transcripts for proinflammatory genes appear particularly sensitive for  
19 discriminating BD patients. Microarray gene expression profiles in purified CD14+  
20 monocytes from whole blood of BD subjects, offspring of BD parents, and healthy  
21 controls (HC) displayed a distinct mRNA signature representing genes from  
22 inflammatory and inflammation-related pathways<sup>32</sup>. The signature showed >80%  
23 sensitivity and specificity in BD subjects who were not receiving lithium or antipsychotic  
24 drugs (n=11), and in affected offspring of a BD parent (n=13, of whom 10 had only  
25 manifested depression). A positive signature also was present in 17 of 38 unaffected  
26 offspring (45%) versus 13 of 70 healthy children (19%). Cross-sectional comparisons  
27 suggested lithium and antipsychotic drugs—but not conventional antidepressant drugs--  
28 down-regulated expression of most inflammatory genes. Thus, when medicated and  
29 unmedicated subjects were considered together only 23 of 42 BD patients (55%) had a  
30 positive signature versus 7 of 38 HCs (18%). Notably, the IL6 mRNA level remained  
31 elevated in medicated BD subjects and did not differ significantly from unmedicated  
32 subjects (table 1), suggesting that this assay identifies a proinflammatory diathesis even  
33 in treated cases.  
34  
35  
36  
37  
38  
39  
40  
41  
42  
43  
44  
45  
46  
47  
48  
49  
50  
51  
52  
53  
54  
55  
56  
57  
58  
59  
60

**Table 1:** Magnitude of difference in mRNA expression between mood disordered and healthy control (HC) samples from Padmos et al.<sup>32</sup>, showing selected transcripts in unmedicated subjects vs HCs, relative to that of medicated BD subjects.

| Gene Symbol | Unmedicated BD vs HC |         | Medicated BD vs HC |         | Affected offspring# vs HC |         |
|-------------|----------------------|---------|--------------------|---------|---------------------------|---------|
|             | fold change          | p-value | fold change        | p-value | fold change               | p-value |
| PDE4B       | 13.73*               | <.001   | 3.42               | <.001   | 5.79                      | <.001   |
| IL6         | 37.92                | .005    | 9.56               | .006    | 935.7                     | <.001   |
| CCL20       | 55.49                | .006    | 6.02               | .10     | 400.1                     | <.001   |

**Legend:** \* - difference significant between unmedicated vs medicated BD samples; # - affected with respect to having manifested either a depressive or a manic episode  
 Sample sizes: unmedicated BD n=11, medicated BD n=31, affected offspring n=13, HCs n=25 for comparisons against BD adults, n=70 for comparisons of offspring. Abbrev: BD – bipolar disorder; HC – healthy control; PDE4B - phosphodiesterase type 4B; IL6 - interleukin 6; CCL20-chemokine ligand 20

**Minocycline is a second-generation tetracycline that may prevent both glutamate-induced excitotoxicity and cytokine-induced inflammation in the CNS and periphery.**

Minocycline has high lipophilicity enabling efficient transfer across the blood brain barrier (BBB)<sup>33</sup> - its concentration in CSF reaches 11–56% of plasma concentrations<sup>34</sup>. Minocycline inhibits the microglial-mediated release of proinflammatory cytokines IL-1 $\beta$ , TNF- $\alpha$ , IL-6, and p38<sup>35</sup>, while promoting release of the anti-inflammatory cytokine,

1  
2  
3 IL-10<sup>34</sup>. Moreover, minocycline inhibits matrix metalloproteinases which process  
4 cytokines such as TNF- $\alpha$  and IL-1 $\beta$  into their biologically active forms<sup>35</sup>. Minocycline is  
5 also an effective scavenger of proapoptotic reactive oxygen species and protects against  
6 excitotoxicity by preventing glutamate-induced activation of nitric oxide synthase  
7 (NOS)<sup>36</sup>. Nitric oxide facilitates glutamate release from presynaptic neurons and inhibits  
8 glial glutamate transporters, amplifying glutamatergic signaling, and contributing to  
9 excitotoxic cell death<sup>10</sup>. Minocycline also upregulates a key molecular factor in the  
10 apoptosis pathway, B-cell CLL/lymphoma 2 (BCL-2)<sup>37</sup>, an effect shared by lithium,  
11 valproate<sup>38</sup> and certain antidepressant drugs<sup>39</sup>. BCL-2 represses apoptosis induced by  
12 cytotoxic insults<sup>40</sup>. Conceivably, minocycline may additionally reduce inflammation  
13 indirectly by blocking the translocation of bacteria across the intestinal barrier. In mice  
14 exposed to a social stressor, bacteria translocated across the intestinal barrier stimulating  
15 the release of circulating cytokines such as IL6, and increasing microbicidal activity via  
16 inducible NOS<sup>41</sup>. Additionally, stress induced a change in the community structure of the  
17 microflora in the cecum with a decrease the relative abundance of bacteria in the genus  
18 Bacteroides and an increase the relative abundance of bacteria in the genus Clostridium.  
19 Notably, these effects were blocked by pretreatment with a broad spectrum antibiotic<sup>41</sup>.

### 35 **Minocycline has neuroprotective and anti-inflammatory properties.**

36  
37  
38 Minocycline prevents glutamate-induced apoptosis of neurons *in vitro*<sup>42</sup>, prevents  
39 ischemia-induced activation of microglia in gerbils<sup>43</sup>, increases hippocampal neuron  
40 survival<sup>44</sup>, reduces lesion-volume and improves neurological function in mice with  
41 traumatic brain injury<sup>45</sup> and in fragile X syndrome<sup>46</sup>, reduces pro-inflammatory cytokine  
42 expression and improves neurological function and locomotor activity in rats with spinal  
43 cord injury<sup>47</sup>, attenuates MDMA-induced neurotoxicity of serotonin and dopamine  
44 systems in the cerebral cortex and hippocampus of mice<sup>48</sup>, reduces inflammation in a rat-  
45 model of rheumatoid arthritis (RA)<sup>49</sup>, and delays disease progression and demyelination  
46 in rodent models of encephalitis<sup>50</sup>, amyotrophic lateral sclerosis (ALS)<sup>51</sup> and  
47 Huntington's Disease (HD)<sup>52</sup>. Based on these data, minocycline was employed, and has  
48  
49  
50  
51  
52  
53  
54  
55  
56  
57  
58  
59  
60

1  
2  
3 shown promise as, a therapeutic agent in human diseases including HD<sup>53</sup>, rheumatoid  
4 arthritis (RA)<sup>54</sup>, and stroke<sup>55</sup>.

7 **Minocycline has been used to treat psychiatric disorders.**

10  
11 Miyaoka et al.<sup>56</sup> discussed 2 patients with catatonic schizophrenia who benefited from  
12 minocycline. This group then conducted a 4-week trial with minocycline (150 mg/day) in  
13 22 patients with schizophrenia to evaluate its efficacy as an adjunct to antipsychotic  
14 drugs<sup>57</sup>. Patients showed a significant improvement in positive and negative symptoms.  
15  
16 Levkovitz et al.<sup>58</sup> recently studied 54 patients with early-stage schizophrenia treated for 6  
17 months with antipsychotic medication and either minocycline (200 mg/day) or placebo in  
18 a double-blind trial. Minocycline was associated with a reduction in negative symptoms  
19 and improved attention/ memory.  
20  
21  
22  
23  
24  
25

26  
27 The efficacy of minocycline has not been formally tested in mood disorders. In rodents,  
28 minocycline reduced immobility during the forced-swim test<sup>59</sup>, and co-administration of  
29 minocycline synergized the antidepressant-like actions of desipramine (but not  
30 fluoxetine)<sup>60</sup>. Minocycline also abrogated the depression-like behavior of rodents  
31 exposed to lipopolysaccharide (LPS)<sup>61</sup>. Levine et al.<sup>62</sup> presented the case of a 66-year old  
32 woman with severe BD, who observed that the tetracycline she took for an infection  
33 alleviated her depression. When her depression returned post-treatment, minocycline was  
34 reinitiated (150 mg/day). After one week her HAM-D score fell from 25 to 8.  
35  
36  
37  
38  
39  
40  
41

42 **Aspirin (Acetyl-salicylic acid, ASA) also holds potential efficacy in bipolar disorder.**

43  
44  
45  
46 The second aim of this study is to assess the antidepressant efficacy of ASA in bipolar  
47 depression. Using a 2 x 2 design we will obtain data providing estimates of the effect size  
48 of ASA relative to placebo, ASA relative to minocycline, and ASA in combination with  
49 minocycline relative to placebo. These data also will explore the specificity of any effect  
50 found for minocycline. The clinical use of low dose ASA primarily has been driven by its  
51 role as an anti-thrombotic and thrombolytic. Given the exaggerated death rate from  
52 cardiovascular events in BD, this action potentially is advantageous in the management  
53  
54  
55  
56  
57  
58  
59  
60



1  
2  
3 of BD. Nevertheless, the recent literature also supports a role for low dose ASA in the  
4 management of the mood disorder itself, specifically in the amelioration of depressive  
5 symptoms.  
6  
7

8  
9  
10 The mechanism of ASA relates to its capacity to inactivate irreversibly the  
11 cyclooxygenase (COX) activity of prostaglandin (PG) H-synthase-1 and PGH-synthase 2  
12 (referred to as COX-1 and COX-2, respectively). Although ASA has a short half-life (15  
13 to 20 min) ASA's permanent inhibition of COX-1 allows once daily dosing for anucleate  
14 platelets. In contrast, because nucleated cells rapidly regenerate this enzyme a shorter  
15 dosing interval is required to persistently impact COX activity in cells that mediate  
16 inflammatory processes. Moreover, ASA is 50- to 100-fold more potent in inhibiting  
17 platelet COX-1 than monocyte COX-2 activity<sup>63</sup>, so there is nearly a 100-fold variation in  
18 the daily dose of aspirin, as higher doses are used to target COX-2 in the management of  
19 treating peripheral inflammation (e.g., arthritis) or pain. As reviewed below, preliminary  
20 evidence obtained in BD suggests beneficial effects are achieved using ASA in low  
21 doses, where aspirin would inhibit COX-1, but not COX-2.  
22  
23  
24  
25  
26  
27  
28  
29  
30  
31  
32

### 33 **Aspirin has neuroprotective and anti-inflammatory properties.**

34  
35  
36  
37 In the brain, recent data indicate that genetic manipulation of COX-1 and COX-2  
38 differentially modulate leukocyte recruitment during neuroinflammation, and suggest that  
39 reduction of COX-1 activity is neuroprotective, whereas reduction in COX-2 activity is  
40 detrimental, during a primary neuroinflammatory response (reviewed in <sup>64</sup>). Choi et al.<sup>64</sup>  
41 propose that these distinct roles reflect the predominant localization of COX-1 in  
42 microglia, which play a major role in mediating neuroinflammation, in contrast to the  
43 predominant localization of COX-2 in pyramidal neurons. For example, Choi et al.<sup>65</sup>  
44 examined the effects of COX-1 or COX-2 deficiency on intracerebroventricular  
45 lipopolysaccharide (LPS)-induced neuroinflammation by comparing COX-1 (-/-) and  
46 COX-2 (-/-) knockout mice to wild-type (WT) (+/+) control animals. After LPS,  
47 leukocyte infiltration and inflammatory response were attenuated in the COX-1 (-/-) mice  
48 but increased in the COX-2 (-/-) mice, compared with WT controls. In another study,  
49  
50  
51  
52  
53  
54  
55  
56  
57  
58  
59  
60

1  
2  
3 Choi et al.<sup>66</sup> examined the effect of COX-1 genetic deletion on the inflammatory  
4 response and neurodegeneration induced by  $\beta$ -amyloid, and found that in COX-1 (-/-)  
5 mice, the A $\beta$ 1-42-induced inflammatory response and associated neuronal damage  
6 were attenuated compared to WT mice. Compatible with these results, in  
7  
8  
9  
10  
11  
12  
13  
14  
15  
16  
17  
18  
19  
20  
21  
22  
23  
24  
25  
26  
27  
28  
29  
30  
31  
32  
33  
34  
35  
36  
37  
38  
39  
40  
41  
42  
43  
44  
45  
46  
47  
48  
49  
50  
51  
52  
53  
54  
55  
56  
57  
58  
59  
60

pharmacoepidemiological studies investigating whether chronic NSAID use reduced the risk of developing Alzheimer's disease (AD), indomethacin, a preferential COX-1 inhibitor, showed beneficial effects, while COX-2 selective inhibitors, failed to show any beneficial effect in AD patients with mild to severe cognitive impairment. These data suggest the hypothesis that inhibition of COX-1 activity may be a valid therapeutic strategy to reduce the cerebral inflammatory response and neurodegeneration in neuropsychiatric diseases in which neuroinflammatory components play a role in pathophysiology.

Other researchers hypothesized that NSAIDs would be beneficial in BD more specifically because of their ability to down-regulate activity in the brain arachidonic acid (AA) cascade by via interfering with phospholipase A2 (PLA2) and/or COX function. In rodents Rapoport and colleagues<sup>67-69</sup> demonstrated that conventional mood stabilizers decrease the AA turnover in phospholipids and the expression of PLA2 and/or COX enzymes. The PLA2 and COX enzymes catalyze, respectively, release of AA from membrane phospholipid and AA conversion to eicosanoids such as prostaglandin E2 and thromboxane B2. The AA cascade is involved in neuroreceptor-initiated signaling and can be pathologically upregulated by neuroinflammation and excitotoxicity.

Nevertheless, aspirin has additional mechanisms that may underlie benefits in neuropsychiatric illness. While low-dose aspirin down-regulates AA cascade activity via inhibition of COX-1 activity, in higher doses it also down-regulates COX-2 gene transcription, increases levels of lipoxigenase-derived eicosanoids such as the anti-inflammatory lipoxin A4, and acetylates COX-2 protein to a modified enzyme that can convert unesterified AA to anti-inflammatory mediators such as 15-epi-lipoxin A4 (reviewed in <sup>70</sup>). The acylated enzyme also can convert docosahexaenoic acid (DHA) to 17-(R)-OH-DHA, which, like its metabolites di(R)-OH-DHA (neuroprotectin (R) D1)

1  
2  
3 and tri(R)-OH-DHA (resolvin (R) D1), is highly anti-inflammatory (reviewed in <sup>70</sup>).  
4  
5 Lithium given chronically to rats with lipopolysaccharide-induced neuroinflammation  
6  
7 also increases the brain concentration of 17-OH-DHA. Thus, there may be a synergy  
8  
9 between aspirin and lithium in forming anti-inflammatory brain DHA metabolites.

### 10 11 **Aspirin appears effective in preliminary studies of mood disorders.**

12  
13  
14  
15  
16 Pharmacological-epidemiological data in BD supportive of these hypotheses were published by  
17  
18 Stolk et al.<sup>70</sup>. Using the Netherlands based PHARMO Record Linkage System (which  
19  
20 connects pharmacy dispensing records to hospital discharge records of > two million  
21  
22 individuals since 1985), these researchers tested whether non-steroidal anti-inflammatory  
23  
24 drugs (NSAIDs) or glucocorticoids would ameliorate bipolar symptoms. The target  
25  
26 sample consisted of 5,145 patients receiving lithium (mean age = 48.6 ± 15 yrs; mean  
27  
28 duration of lithium use=847 days), based upon the assumption that lithium treatment is  
29  
30 relatively specific to individuals with BD. The main outcome measure was a calculated  
31  
32 incidence density (ID) of medication events (change in the type or numbers of  
33  
34 psychotropic medications prescribed, or increase [ $>30\%$ ] in the psychotropic drug dose).  
35  
36 Subjects receiving low-dose ( $\leq 80$  mg/day) aspirin were 17% less likely to have a  
37  
38 medication event, a finding that remained significant after adjusting for age, sex, chronic  
39  
40 disease score and health care utilization. This effect was selective for low-dose ASA. In  
41  
42 contrast, high-dose aspirin or non-selective NSAIDs (i.e., regimens expected to inhibit  
43  
44 both COX-1 and -2), selective COX-2 inhibitors and glucocorticoids did not produce a  
45  
46 statistically significant protection. Instead, the co-administration of non-selective  
47  
48 NSAIDs and glucocorticoids was associated with statistically significant increases in  
49  
50 medication events, suggesting destabilization of bipolar illness. The finding that low-dose  
51  
52 aspirin decreased the number of medication events was particularly noteworthy since  
53  
54 aspirin does not significantly augment serum lithium levels in contrast to selective COX-  
55  
56 2 inhibitors which can raise lithium levels<sup>71</sup>. These preliminary observations thus  
57  
58 appeared consistent with the hypothesis that COX-1 inhibitors can reduce  
59  
60 neuroinflammatory processes and thus benefit BD patients.

1  
2  
3 Notably, the observation that beneficial effects in BD were conferred by low-dose ASA,  
4 but not by nonselective COX inhibitors, COX-2 inhibitors or glucocorticoids, appeared  
5 inconsistent with the hypothesis that drugs that down-regulate AA cascade activity in  
6 general hold therapeutic potential in BD. Thus the putative neuroprotective effects  
7 associated with COX-1 inhibition may contribute specifically to the benefits of low-dose  
8 aspirin in BD observed by Stolk et al. For example, as reviewed above, aspirin and  
9 lithium may exert synergistic effects in forming anti-inflammatory brain DHA  
10 metabolites (reviewed in <sup>70</sup>).

11  
12  
13  
14  
15  
16  
17  
18  
19  
20 Other data suggest that aspirin exerts antidepressant effects within the context of MDD or  
21 cardiovascular illness. Mendlewicz et al.<sup>72</sup> examined the effect of aspirin augmentation of  
22 conventional antidepressant pharmacotherapy in 24 patients with MDD who had proven  
23 non-responsive after 4 weeks of SSRI treatment. Participants were treated openly during  
24 the subsequent 4 weeks with aspirin 160 mg/day in addition to their SSRI regimen. The  
25 combined administration of SSRI plus aspirin was associated with a response rate of  
26 52.4%. Remission was achieved in 43% of the total sample and 82% of the responder  
27 sample. In the responder group, a significant improvement was observed within week 1  
28 and this benefit persisted through day 28. In another study Ketterer et al.<sup>73</sup> reported that  
29 in 174 males undergoing coronary angiography (of whom 99 were taking low-dose  
30 aspirin), aspirin use was associated with less depression and anxiety symptoms.

31  
32  
33  
34  
35  
36  
37  
38  
39  
40 In contrast, a preliminary study of the selective COX-2 inhibitor, celecoxib, was negative  
41 in bipolar depression<sup>74</sup>, potentially compatible with the negative results of COX-2  
42 inhibitors reported by Stolk et al.<sup>70</sup>. In a double-blind, randomized, add-on clinical trial of  
43 celecoxib in patients (n = 28) studied during a depressed or mixed episode of BD, no  
44 significant difference was observed between the celecoxib and placebo add-on groups at  
45 study endpoint<sup>74</sup>. These results contrasted with those obtained using celecoxib in unipolar  
46 depression, however. In MDD, celecoxib augmentation of either reboxetine<sup>75</sup> or  
47 fluoxetine<sup>76</sup> was associated with a significant therapeutic effect on depressive symptoms  
48 in randomized, double-blind, add-on clinical trials.

## METHODS AND ANALYSIS

### Participants

One hundred and twenty male or female outpatients between 18 and 55 years of age, who meet DSM-IV-TR criteria for BD (type I or II) and for a current major depressive episode will be recruited. The depressive syndrome must have been present for at least 4 weeks and the minimum threshold for depression severity will be set at a 17-item HAM-D score  $\geq 18$ . Subjects will provide written informed consent as approved by the Western Institutional Review Board.

### Concurrent Medications

At study entry type I BD subjects must have been taking a stable dose of a mood-stabilizing medication (lithium, valproate, carbamazepine, lamotrigine, antipsychotic agents), for at least 4 weeks, dosed clinically to target the therapeutic range. Type II BD subjects will be included irrespective of whether they present on a mood stabilizer. To investigate the utility of this augmentation strategy in the population for whom minocycline is most likely to prove therapeutically relevant, volunteers receiving stable doses of mood stabilizing, antipsychotic, antidepressant, and/or anxiolytic drugs for at least 4 weeks will be included. However, volunteers who currently are receiving more than 4 psychotropic medications in a daily regimen will be excluded, since this condition may signify a more brittle or complex clinical state. Subjects may remain in psychotherapy or have no psychosocial intervention. Volunteers will be excluded if they currently are receiving medications likely to have adverse interactions with minocycline or aspirin, including NSAIDs, warfarin, digoxin, penicillins, and isotretinoin products.

For participants who enter the study, the preferred strategy will be for subjects to maintain the same regimen of concurrent medications throughout the six week study so that only the study drug regimen will be altered per protocol. Nevertheless, changes to concurrent medications will not affect study status, so long as the medication change does

1  
2  
3 not target a depressive or manic symptom. If changes to concurrent medication regimens  
4 are clinically required to address worsening depressive symptoms or the development of  
5 manic symptoms, then the subject will be dropped from the study.  
6  
7  
8  
9

## 10 **Study Design**

11  
12  
13  
14 Patients will participate in a randomized, double-blind, placebo-controlled, trial with a 2  
15 x 2 design. As adjuncts to existing treatment, subjects will receive placebo-minocycline  
16 plus placebo-aspirin, active-minocycline plus placebo-aspirin, placebo-minocycline plus  
17 active-aspirin, or active-minocycline plus active-aspirin. The randomization sequences  
18 will be determined by a research staff-member who is not obtaining clinical information  
19 from the research subject and will be assigned by subject number at consenting. A  
20 restricted randomization (permuted block randomization) method will be used in which  
21 subjects are randomly allocated to each block (n=30) to ensure that equal numbers of  
22 participants receive each drug/placebo combination. In order to ensure that experimental  
23 group assignment is not skewed across the two trial sites, the study progress will be  
24 monitored by individuals who are not involved in the data collection, and in the case of  
25 “drift”, adjustments will be made as necessary.  
26  
27  
28  
29  
30  
31  
32  
33  
34  
35  
36

37 The trial will be conducted over 6 weeks and will comprise 7 assessment sessions (figure  
38 1). The subject will be seen at the prescribed time intervals within a window of two  
39 business days on either side of visit target date to complete the specified visits.  
40  
41  
42  
43

44 At each session, a clinical assessment will be conducted using the rating scales listed  
45 below, and treatment side-effects will be assessed and rated for severity. To preserve the  
46 rater blind, the research staff member who conducts the clinical ratings will not be the  
47 research staff member who assesses the presence of side effects, and will remain blind to  
48 the information pertaining to side effects. Subjects who experience severe adverse effects  
49 or who develop treatment-associated hypomania or mania will be dropped from the  
50 study, instructed to discontinue the study medication, and referred for appropriate clinical  
51 management of these adverse events.  
52  
53  
54  
55  
56  
57  
58  
59  
60

1  
2  
3  
4  
5 The primary outcome measure will be the change in the Montgomery-Asberg Depression  
6 Rating Scale (MADRS) scores at the seventh assessment session (week 6).  
7  
8  
9

## 10 Medication

11  
12  
13  
14 This pilot proof-of-concept study will adhere to the dosing limits and route of  
15 administration for the FDA indications for minocycline's and aspirin's use in other  
16 conditions (thus an IND is not required). A fixed dose design will be followed, and all  
17 medications will be administered via the p.o. route. The pilot data extant for both study  
18 drugs supports an onset of improvement within two weeks, so the six week study  
19 duration is expected to provide sufficient time to detect an antidepressant effect, to  
20 provide information about the persistence of the antidepressant effect over about one  
21 month from the anticipated onset of effect, and to minimize dropouts.  
22  
23  
24  
25  
26  
27  
28

29  
30 For minocycline the starting dose will be 100 mg b.i.d. (total daily dose=200 mg). This  
31 dose of 100 mg b.i.d. has been shown by a substantial literature to produce consistent  
32 anti-inflammatory effects in rheumatoid arthritis and other inflammatory disorders. This  
33 also is the dose used in a recent schizophrenia treatment trial<sup>58</sup>. The associated placebo  
34 capsules match the appearance of the 100 mg minocycline capsule.  
35  
36  
37  
38

39  
40 The starting dose of aspirin will be 81 mg p.o. b.i.d. This dose is sufficient to inhibit  
41 COX-1, and appeared beneficial in stabilizing the course of BD in the pharmaco-  
42 epidemiological study of Stolk et al.<sup>70</sup>. When aspirin is used as an anti-platelet drug once  
43 daily dosing is sufficient since anucleate platelets do not produce enough COX-1 to  
44 overcome the irreversible inhibition of COX-1 within a 24-hour period. In contrast, in  
45 nucleated cells COX-1 is replenished, so more frequent dosing is required to persistently  
46 inhibit COX-1. Thus we will administer the dose in a b.i.d. regimen, according to the  
47 guidelines described above. A total daily dose of 160 mg was administered in the  
48 preliminary study which reported that aspirin significantly augmented the antidepressant  
49  
50  
51  
52  
53  
54  
55  
56  
57  
58  
59  
60



1  
2  
3 effects of fluoxetine in MDD<sup>72</sup>. The relevant placebo matches the appearance of the  
4 aspirin tablet.  
5  
6

7  
8  
9 Participants will be advised that one of the study drugs may reduce the efficacy of oral  
10 contraceptives, and to avoid taking the study drugs within 3 hours of iron products or of  
11 antacids containing calcium, magnesium or aluminum. They also will be advised that one  
12 study drug can increase their risk for bleeding during surgical procedure or if combined  
13 with other drugs or herbal preparations that reduce hemostasis.  
14  
15  
16

### 17 18 19 **Compensation**

20  
21  
22 Participants will be compensated for participation in the amount of \$300.00.  
23  
24  
25

### 26 27 **Treatment Compliance**

28  
29  
30 To enhance compliance, study participants will be given an information sheet to take  
31 home detailing the procedure to be followed in the case of a missed dose, and requesting  
32 that this information be recorded for the investigators. The number of capsules and tablets  
33 remaining in each supply given to the patients will also be counted to evaluate treatment  
34 compliance. In cases where treatment compliance is poor, subjects will be excluded from  
35 the data analysis, using conventional criteria for defining adequate compliance in a  
36 clinical trial.  
37  
38  
39  
40  
41  
42  
43

44 [Fig. 1, here]  
45  
46  
47

### 48 49 **Psychiatric Assessment and Clinical Ratings**

50  
51 Patients will be evaluated and followed in the outpatient clinics at LIBR or Oklahoma  
52 University School of Community Medicine in Tulsa, OK, or at the University of Kansas  
53 Medical Center Research Institute (KUMCRI) in Wichita, KS. The diagnosis of BD will  
54 be established using DSM-IV-TR criteria on the basis of an unstructured interview  
55  
56  
57  
58  
59  
60

1  
2  
3 conducted by a psychiatrist and the MINI-Plus administered by trained psychiatric  
4 interviewers. The following rating scales will be administered: MADRS, Quick Inventory  
5 of Depressive Symptomatology (QUIDS; 16 item), Hamilton Anxiety Rating Scale  
6 (HAM-A), Young Mania Rating Scale (YMRS), Universal Fagerstrom (to assess nicotine  
7 use), Hollingshead socioeconomic scale, Sheehan Disability Scale (SDS) and the Family  
8 Interview for Genetic Studies (FIGS). Medical assessment will include a physical  
9 examination, electrocardiogram, complete blood count (CBC), electrolytes and liver-  
10 function assays (SMA 20), thyroid panel, and urinalysis, serum drug and pregnancy tests  
11 at study entry and study completion. At each follow-up session, the MADRS, HAM-A,  
12 YMRS, and Clinical Global Impressions (CGI) scale will be repeated. Physical and  
13 psychiatric symptoms will be evaluated and recorded in order to measure the side-effect  
14 profiles of minocycline and aspirin. Participants will be questioned about adverse  
15 reactions, including dizziness, photosensitivity, hyperpigmentation, gastrointestinal  
16 distress or bleeding at each assessment and will be withdrawn from the study if medically  
17 necessary. Vital signs will be measured at entry and at each session.  
18  
19  
20  
21  
22  
23  
24  
25  
26  
27  
28  
29  
30  
31

### 32 **Immune System Measures**

33  
34  
35 The activity of peripheral cytokines correlates with inflammatory processes in the CNS.  
36 Peripheral cytokines cross the BBB, and can propagate signals across the BBB in the  
37 form of small, freely diffusible lipophilic molecules such as prostaglandins, which induce  
38 the production of cytokines from glia<sup>77</sup>. The measurement of peripheral markers of  
39 inflammation thus serves as a valid, if indirect assessment of CNS inflammation.  
40  
41  
42  
43  
44  
45

46 To explore predictors and correlates of treatment outcome, blood will be sampled for  
47 testing plasma and whole blood peripheral blood monocyte (PBM) based markers of  
48 inflammation at baseline and study end. These markers will include 10 cytokine proteins  
49 (IL-1 $\beta$ , IL-2, IL-4, IL-5, IL-6, IL-8, IL-10, IL-12p70, IFN $\gamma$ , and TNF, high sensitivity  
50 (hs) CRP, and RNA expression of candidate genes from PBMCs. Candidate genes  
51 include IL-6, TNF, and IRF5 ( a factor that mediates monocyte polarization). The 10  
52 inflammation-related cytokines and the PBMC mRNA will be assayed from plasma at  
53  
54  
55  
56  
57  
58  
59  
60

1  
2  
3 baseline and study end. We selected the markers IL-6, TNF and CRP because they are the  
4 most widely implicated in mood disorders. The other cytokines included in the cytokine  
5 bead array assays are measured simultaneously with IL-6 and have all been implicated in  
6 the general regulation of inflammation. A meta-analysis of >100 studies found that IL-6  
7 and CRP each were significantly elevated in depressed patients with standardized mean  
8 difference scores (d) of 0.71 and 0.26, respectively<sup>78</sup>. The associations remained  
9 significant after adjustment for body-mass index (BMI) and smoking. Moreover, IL-6 has  
10 been shown to modulate HPA axis function by inducing CRH release,  
11 adrenocorticotrophic hormone synthesis, and corticosteroid production<sup>79</sup>. CRP production  
12 is induced by the proinflammatory cytokines, IL-1, IL-6, and IL-17, and is thus a non-  
13 specific marker of systemic inflammation.  
14  
15  
16  
17  
18  
19  
20  
21  
22  
23

24 Three blood samples will be transported to the immunology lab in the Department of  
25 Surgery at the University of Oklahoma College of Medicine for each participant at each  
26 of the sampling time-points (sessions 1 and 7). One sample will be centrifuged to obtain  
27 plasma which will be stored at -80°C until analyzed. Serum CRP, IL-6, TNF, and the  
28 other cytokines listed above will be assayed in duplicate with ELISA (CRP high-  
29 sensitivity kit, R & D Systems, Oxford, UK) or enhanced cytokine bead array flex kits  
30 (Becton Dickinson) using the manufacturer's reagents and standards. The other two  
31 samples will be used to isolate PBMCs and plasma and will be frozen until processed.  
32 Monocytes will be isolated from the PBMCs in order to assess mRNA levels similar to  
33 the method used by Padmos et al.<sup>32</sup>. This procedure utilizes monoclonal antibodies  
34 directed against human CD14 to isolate monocytes in peripheral blood monocyte cell  
35 suspensions. A magnetic cell sorting system will be used for the separation of the  
36 monocytes and flow cytometry will be used to gauge the purity of the population. Once  
37 purity is established, total RNA will be isolated from the monocytes using an RNeasy kits  
38 (Qiagen) according to the manufacturer's directions. RNA will then be reverse  
39 transcribed to cDNA using standard commercial kits. rtPCR reactions will be performed  
40 using the Dynamo Sybr Green HS Master Mix (New England Biolabs) and custom  
41 primers will be synthesized by a commercial laboratory. Real-time rtPCR reactions will  
42 be run using a Cepheid Smart Cyclyer II or similar instrument. Additional aliquots of  
43  
44  
45  
46  
47  
48  
49  
50  
51  
52  
53  
54  
55  
56  
57  
58  
59  
60

1  
2  
3 serum and plasma will be stored so that other inflammatory markers can be tested in the  
4 future using Luminex bead arrays and/or additional available technologies.  
5  
6  
7

### 8 9 **Source of Compounds Tested**

10  
11  
12 Minocycline and aspirin are available on a generic basis, and are manufactured within the  
13 USA by several companies. The identity of the active medicines and placebos will be  
14 blinded using placebos that match the appearance of the active drugs. The medications  
15 and placebos have been formulated by Wedgewood Pharmacy, Swedesboro, NJ. The  
16 study minocycline capsule and chewable aspirin tablet are identical in appearance to their  
17 corresponding placebos.  
18  
19  
20  
21  
22

### 23 24 **Outcome Measures and Data Analysis**

25  
26  
27  
28 Antidepressant response will be evaluated by assessing changes in MADRS scores at  
29 assessment session # 7 (i.e. 6 weeks). Our *a priori* hypothesis is that minocycline and/or  
30 aspirin plus existing medication will exert greater antidepressant effects than placebo plus  
31 existing medication by study completion. Assuming that there are equal numbers of  
32 subjects in each treatment group, this hypothesis will be statistically assessed using a  
33 group (for the four treatment cells)-by-session (1 vs. 7) repeated measures analysis of  
34 variance (ANOVA). If the ANOVA statistic is significant, between- and within-group t  
35 tests will be used in planned comparisons to identify the nature of the effect leading to the  
36 significant overall ANOVA statistic. We expect to find a significant group-by-session  
37 interaction, attributable to a greater reduction in MADRS scores in the minocycline and  
38 aspirin groups compared to the placebo group between session 1 and session 7. If there is  
39 an imbalance in the number of subjects across groups, (e.g., due to differential dropout  
40 rates during the first treatment week), the data analysis will be conducted with a mixed-  
41 effects model.  
42  
43  
44  
45  
46  
47  
48  
49  
50  
51  
52

53  
54 | A Mixed Effect Model Repeated Measure (MMRM)<sup>80</sup> will be used to [impute-derive](#)  
55 missing data points as this method has been shown to be superior to last observation  
56  
57  
58  
59  
60

1  
2  
3 carried forward (LOCF) which can inflate the Type I error rates<sup>81</sup>. The LOCF and  
4  
5 observed cases (OC) approaches to data imputation will be used *post-hoc* to provide  
6  
7 further confirmation of the results obtained under the MMRM analysis.  
8  
9

10  
11 In order to test whether the putative antidepressant effects of minocycline or aspirin have  
12  
13 a rapid onset, as a *post hoc* analysis the ANOVA will be repeated using MADRS ratings  
14  
15 from the assessment that follows the first week of exposure to active drug versus the  
16  
17 corresponding change under placebo; i.e. session 2. *Post hoc* tests will be performed to  
18  
19 assess the significance of changes in the secondary clinical outcome measures (QUIDS  
20  
21 16, HAM-A, YMRS, CGI-I).  
22

23  
24 The rate of completion in the four cells also will be considered an outcome measure. The  
25  
26 completion rate in the minocycline and/or aspirin arms may be influenced more by  
27  
28 dropouts due to side effects while the completion rate in the placebo group may be  
29  
30 influenced more by dropouts due to non-response. Two different measures of completion  
31  
32 rate will be obtained: completion of week 1 of the study (baseline to week 1) and  
33  
34 completion of the study (baseline to week 6). Differences between the groups in  
35  
36 completion rates will be assessed with a [chi-squared test or a logistic regression.](#)  
37  
38 [ANOVA.](#)  
39

40  
41 We will test the hypothesis that minocycline and aspirin reduce inflammation (e.g. CRP,  
42  
43 IL-6, IL-6 mRNA) more than placebo using statistical analyses similar to those described  
44  
45 above. If the assay results are normally distributed then a group-by-session repeated-  
46  
47 measures ANOVA with CRP, IL-6 and nine other cytokine levels as dependent variables,  
48  
49 and BMI, smoking status, and time of blood draw as covariates, will be used to assess  
50  
51 anti-inflammatory effects of minocycline and aspirin. Mixed-effect models will be used if  
52  
53 necessary. If the CRP or inflammatory cytokine data are not normally distributed  
54  
55 (Kolmogorov-Smirnov test) or if the equality of statistical variance assumption across  
56  
57 assessments is violated (Levene's test), then Friedman's ANOVA will be used to test for  
58  
59 CRP or inflammatory cytokine differences between groups. If the Friedman's ANOVA  
60  
61 statistic is significant, Wilcoxon sign-ranked tests will be used for post-hoc analysis of

1  
2  
3 group differences. Nonspecific factors that influence CRP and inflammatory cytokine  
4 levels include time of day, presence of infection, treatment with anti-inflammatory  
5 medications, smoking, obesity, and alcohol abuse. We will attempt to control for these  
6 potential confounds by measuring BMI and recording NSAID and nicotine use  
7 (Universal Fagerstrom scale), and by excluding individuals who have recently abused  
8 substances or who have intercurrent infections. The serum CRP concentration shows  
9 minimal diurnal variability in adults<sup>82</sup> but IL-6 and other cytokine levels vary across time  
10 of day<sup>83</sup>. To minimize cytokine measurement variability due to circadian fluctuations, we  
11 will schedule patient assessment sessions at the same time each day. Since this may not  
12 always be possible, we will record the time of day that each blood-draw is made, divide  
13 the day into quartiles: 7am-10am, 10am-12pm; 12pm-3pm, and 3pm-6pm, and use these  
14 data as a covariate in the statistical analyses.  
15  
16  
17  
18  
19  
20  
21  
22  
23  
24

25  
26 To test whether baseline levels of CRP and inflammatory cytokines predict response to  
27 minocycline or aspirin, we will subclassify the participants using conventional criteria<sup>84</sup>  
28 as achieving full response ( $\geq 50\%$  reduction in MADRS score from baseline), partial  
29 response ( $< 50\%$  but  $\geq 25\%$  reduction), or nonresponse ( $< 25\%$  reduction). Patients  
30 achieving remission (post-treatment MADRS score  $\leq 10$ ) will also be identified. A non-  
31 parametric alternative to the ANOVA statistic, the Mann-Whitney test, will be used to  
32 compare remitted and non-remitted groups in baseline levels of inflammatory cytokines  
33 and CRP if the data are not normally distributed. Ideally, the impact of baseline levels of  
34 inflammation on treatment response would be tested more rigorously using a formal  
35 stratified design. However, in order to conduct a stratified trial with for example, 8  
36 experimental groups (4 x high versus low inflammation), the sample size of the study  
37 would have to be doubled, which would significantly increase costs and decrease  
38 feasibility. Nevertheless, this stratification approach would be important to consider for  
39 future studies if promising results are obtained in this clinical trial.  
40  
41  
42  
43  
44  
45  
46  
47  
48  
49  
50

## 51 52 53 **Statistical Power** 54 55 56 57 58 59 60

1  
2  
3 A recent meta-analysis of 96 antidepressant treatment studies found that the average  
4 effect size of a placebo treatment is 1.69 compared with 2.50 for an antidepressant  
5 treatment<sup>85</sup>. We calculated that in order to detect an effect size of 0.81 (i.e. the difference  
6 between 2.50 and 1.69) with an 80% probability (2-sided test,  $\alpha=0.05$ ), we will require a  
7 sample size of 26 subjects per group  
8  
9  
10  
11  
12 ([http://hedwig.mgh.harvard.edu/sample\\_size/size.html](http://hedwig.mgh.harvard.edu/sample_size/size.html)). This effect size may correspond  
13 to approximately 3 points on the MADRS. Thus given our sample size of 30 per group  
14 we should have sufficient power to test Specific Aim 1, allowing for a 13% drop-out rate  
15 during week 1 of the study (dropouts after completion of study week 1 will be included in  
16 the analysis under the MMRM approach described above).  
17  
18  
19  
20  
21

22  
23 As discussed above, a recent meta-analysis<sup>78</sup> of cross-sectional studies of serum-derived  
24 IL-6 and CRP in depression calculated effect sizes of 0.71 for IL-6 and 0.26 for CRP.  
25 Based on these effect sizes a sample size of 26 would yield >80% probability of detecting  
26 significant depression-related changes in IL-6, but only a 60% probability of detecting a  
27 depression-related change in CRP. There are 3 reasons why we believe that these CRP  
28 power estimations are not applicable to this study. Firstly, the effect sizes derived from  
29 the meta-analysis are based on cross-sectional studies. Given the effect of variables such  
30 as smoking, diet, exercise, and BMI on proinflammatory cytokines, a within-subjects  
31 design is likely to reduce non-depression-related sources of variance, and substantially  
32 increase statistical power. Secondly, we are not only examining the effect of mood on IL-  
33 6 and CRP levels, but are treating patients with minocycline and aspirin, drugs known to  
34 possess anti-inflammatory properties. We therefore suggest that our proposed study is  
35 likely adequately powered to detect any true changes in plasma IL-6, CRP, and the other  
36 inflammatory cytokines across treatment blocks.  
37  
38  
39  
40  
41  
42  
43  
44  
45  
46  
47  
48

49 Regarding IL-6 mRNA gene expression in peripheral blood monocytes, Padmos et al.<sup>32</sup>  
50 reported a 38-fold increase in IL-6 mRNA levels in unmedicated patients with BD  
51 compared with HC. Since minocycline reduces IL-6 levels (see above) we expect our  
52 study to have very high power to detect differences between groups, as well as changes in  
53 response to minocycline. The simultaneous detection of nine other inflammation-related  
54  
55  
56  
57  
58  
59  
60



1  
2  
3 cytokines, in addition to IL-6 (using newer more sensitive technology) will provide much  
4 finer resolution of the effects on inflammatory cascades than that measured in previous  
5 studies.  
6  
7  
8  
9

## 10 **ETHICS AND DISSEMINATION**

### 11 **Gender/Minority/Pediatric Inclusion for Research**

12  
13  
14  
15  
16  
17  
18 Women and Minorities will be included in the study without prejudice according to their  
19 representation in the study population. Participants will be recruited from the greater  
20 metropolitan areas of Tulsa, OK and Wichita, KS and efforts will be made to ensure that  
21 our subject population resembles the gender, ethnic and racial composition of these areas.  
22  
23  
24  
25

### 26 **Exclusion Criteria**

27  
28  
29  
30  
31 The following exclusion criteria apply: 1) inability to provide informed consent; 2) age of  
32 onset of BD>40 years; 3) serious risk of suicide; 4) current delusions or hallucinations  
33 sufficient to interfere with the capacity to provide informed consent; 5) current manic  
34 symptoms [depressed BD patients with concurrent manic symptoms have been found to  
35 be more likely to experience adverse reactions in antidepressant treatment trials<sup>86</sup>]; 6)  
36 medical illness including as hepatic impairment, renal dysfunction, bleeding diatheses  
37 (e.g., hemophilia), cerebrovascular disease or heart disease, hypertension that is  
38 inadequately controlled by medication, diabetes mellitus, or known peptic ulcer disease;  
39 7) abuse of drugs or alcohol within the preceding 6 months, or substance dependence  
40 within the last 5 years; 8) daily alcoholic beverage consumption equivalent to  $\geq 3$  oz. of  
41 alcohol; 9) asthma or known allergies or hypersensitivities to tetracycline antibiotics,  
42 aspirin or other NSAIDs; 10) current use of drugs that could increase the risks associated  
43 with aspirin or minocycline administration, namely other antibiotic medications, other  
44 NSAIDs or anticoagulants (e.g., warfarin), acetazolamide, or methotrexate; 11) known  
45 HIV or other chronic infection including, but not limited to viral hepatitis. 12) Pregnant  
46  
47  
48  
49  
50  
51  
52  
53  
54  
55  
56  
57  
58  
59  
60

1  
2  
3 or nursing women, and women who are attempting to conceive during the 6 week study  
4 period, will also be excluded.  
5  
6  
7

### 8 9 **Specimens, Records, and Data Collection**

10  
11 A physician, registered nurse, or trained phlebotomist will utilize a sterile technique to  
12 draw 60 ml of blood by venipuncture. Participants will also be asked to submit a urine  
13 sample. A physician, registered nurse, or trained technician will collect EKG data from  
14 the subject in a private exam room.  
15  
16  
17  
18

### 19 20 21 **Recruitment and Consent Procedure**

22  
23  
24  
25  
26  
27  
28  
29  
30  
31  
32  
33  
34  
35  
36  
37  
38  
39  
40  
41  
42  
43  
44  
45  
46  
47  
48  
49  
50  
51  
52  
53  
54  
55  
56  
57  
58  
59  
60  
Volunteers will be recruited from the community as well as from the clinical services at  
the Laureate Psychiatric Clinic and Hospital and the Oklahoma University School of  
Community Medicine in Tulsa, OK, and from the clinical services affiliated with the  
KUMCRI. Volunteers may be referred from sources that include physicians, newspaper  
advertising, self-help organizations, self-referral, and WIRB approved flyers posted at  
local universities, schools, churches and grocery stores. Participants may be pre-screened  
through screening protocols based at LIBR or KUCRI. We plan to recruit a total of 120  
participants.

All participant interactions including consenting will be conducted in private interview /  
exam rooms. These rooms are secured from public areas via combination locked doors  
that are only accessible to authorized personnel. Prospective participants will receive an  
explanation of the objectives, procedures, and hazards of this protocol that is appropriate  
to their level of understanding. The right of the subject to decline to participate or to  
withdraw from the study at any time will be made clear.

Non-English speaking participants will not be recruited.

1  
2  
3 After the consent form is verbally explained to the participant, and any questions have  
4 been answered, the researcher will leave the room to allow the participant to read the  
5 consent form thoroughly. Family members will be allowed to be present and to discuss  
6 the consenting process with the participant. After the consent is read, the researcher will  
7 return and answer any additional questions the participant may have. The researcher will  
8 remind the subject that participation is strictly voluntary and that they have the right to  
9 withdraw at any time. Participants will be asked to arrive 30 minutes early in order to  
10 have sufficient time for the consenting process.  
11  
12  
13  
14  
15  
16  
17  
18  
19

### 20 **Subject Risks**

21  
22  
23 The risks of behavioral testing are minimal. The risks of blood drawing are also minimal.  
24 Possible mild side effects of the blood draw include mild pain or bruising at the site of  
25 the venipuncture.  
26  
27  
28  
29

30 Minocycline has been used a broad-spectrum antibiotic for many years in doses up to 400  
31 mg/day<sup>34</sup>. It has been used on a chronic basis to treat acne and rheumatoid arthritis, often  
32 for many years, in hundreds of thousands of patients. The most commonly encountered  
33 side effects are upset stomach, diarrhea, dizziness, drowsiness, ataxia, vertigo, headache  
34 and vomiting. Prolonged use can be associated with pigmentation of the skin, gums or  
35 teeth. Between 1975 and 2006, the World Health Organization Collaborating Center for  
36 International Drug Monitoring listed 122 cases of adverse drug reactions to intravenous  
37 minocycline; most commonly, abnormal hepatic function and thrombocytopenia<sup>34</sup>. These  
38 included cases of serious liver injury, including irreversible drug-induced hepatitis and  
39 fulminant hepatic failure that was fatal in two cases, thought to be due to triggering or  
40 unmasking autoimmune hepatitis. One case of autoimmune-related glomerulonephritis  
41 has been reported. The role of oral minocycline in precipitating these conditions has not  
42 been clearly established. Minocycline also has been associated with idiopathic  
43 intracranial hypertension (pseudotumor cerebri). Long-term trials have shown that  
44 minocycline is well tolerated. In a 2-year trial of minocycline (200 mg/day) for RA, 3 of  
45 30 patients withdrew due to finger-nail discoloration, dizziness, or erythematous rash<sup>54</sup>.  
46  
47  
48  
49  
50  
51  
52  
53  
54  
55  
56  
57  
58  
59  
60

1  
2  
3 Of 11 patients with HD treated with minocycline (100 mg/day) for 2 years, one  
4 complained of nausea in the first 3 weeks, and two of sedation<sup>53</sup>, while in a 6-month trial  
5 of minocycline for ALS, the mean tolerated dose was 387 mg/day and the most common  
6 adverse effects were gastrointestinal<sup>87</sup>. Five of 36 patients with schizophrenia withdrew  
7 from a 6-month trial of minocycline (200 mg/day) due to indigestion (n=2), pigmentation  
8 (n=2), or a suicide attempt (n=1)<sup>58</sup>.

14  
15  
16 Low dose aspirin has been safely used in many millions of patients on a worldwide scale  
17 for its role as an anti-thrombotic and thrombolytic. A meta-analysis of >100 randomized  
18 trials in high-risk patients indicated that low-dose ASA reduced cardiovascular death by  
19 15% and prevented nonfatal vascular events by about 30%<sup>88</sup>. These data stand in striking  
20 contrast to the data obtained in COX-2 inhibitors, which can increase cardiovascular risk.  
21 In clinical trials of several COX-2 selective and nonselective NSAIDs of up to three years  
22 duration have shown an increased risk of serious cardiovascular (CV) thrombotic events,  
23 myocardial infarction, and stroke, which have in many cases been fatal<sup>89</sup>. Patients with  
24 known CV disease or risk factors for CV disease are at greater risk for such events during  
25 chronic treatment with COX-2 inhibitors. Evidence from human pharmacology and  
26 genetics, genetically manipulated rodents, and other animal models and randomized trials  
27 indicates that this is consequent to suppression of COX-2-dependent cardioprotective  
28 prostaglandins, particularly prostacyclin<sup>90</sup>.

39  
40 Aspirin does not cause a generalized bleeding abnormality unless given to patients with  
41 an underlying hemostatic defect (e.g., hemophilia, uremia, or that induced by  
42 anticoagulant therapy). Aspirin-induced impairment of primary hemostasis cannot be  
43 separated from its antithrombotic effect and is similar at all doses  $\geq 75$  mg/d<sup>91</sup>. The risk  
44 of intracranial bleeding is exceedingly rare (<0.1% in high risk populations), but is higher  
45 in individuals with cerebrovascular disease<sup>88</sup>. Hypertension that is inadequately  
46 controlled by medication often is considered a contraindication to aspirin because of the  
47 concern that possible benefits in the prevention of cardiovascular events may be  
48 counterbalanced by an increased risk of cerebral bleeding. However, hypertensive  
49 patients whose blood pressure is well-controlled appear protected from myocardial  
50  
51  
52  
53  
54  
55  
56  
57  
58  
59  
60

1  
2  
3 infarction by aspirin therapy without an increase in the number of cerebral hemorrhages  
4 or strokes<sup>92</sup>. Moreover, aspirin therapy does not affect blood pressure or the response of  
5 hypertension to antihypertensive agents<sup>91 93</sup>.  
6  
7  
8  
9

10 NSAIDs as a class can cause serious gastrointestinal (GI) adverse events including  
11 inflammation, bleeding, ulceration, and perforation of the stomach, small intestine, or  
12 large intestine, which rarely have proven fatal. In controlled clinical trials the percentage  
13 of patients reporting one or more gastrointestinal complaints has ranged from 4% to  
14 16%<sup>91</sup>. The mechanism underlying this adverse effect appears attributable to the  
15 inhibition of COX-1. Thus, the incidence of GI side effects has been higher for NSAIDs  
16 with more potent effects at COX-1, such as aspirin and indomethacin. For example, in  
17 controlled trials the incidence of GI side effects for aspirin and indomethacin have been  
18 about twice as high as that for ibuprofen, a nonselective COX inhibitor, in equally  
19 effective doses for arthritis. Nevertheless, the incidence of GI side effects associated with  
20 aspirin is dose-dependent, and thus is markedly lower when using aspirin in the low dose  
21 range planned for the current study. Notably, the risk of GI bleeding is not reduced by  
22 using the enterically coated aspirin formulations, but is thought to be lower during  
23 concomitant use of omeprazole<sup>91</sup>. The effects of warfarin and NSAIDs on GI bleeding are  
24 synergistic, such that the users of both drugs together have a risk of serious GI bleeding  
25 higher than users of either drug alone. Fortunately, the risk of GI bleeding, which reflects  
26 the inhibition of prostaglandins in the stomach (from systemic rather than local exposure)  
27 is much smaller when using low-dose as opposed to high-dose aspirin.  
28  
29  
30  
31  
32  
33  
34  
35  
36  
37  
38  
39  
40  
41  
42  
43

44 Low-dose aspirin has not been reported to alter renal function, and does not reduce  
45 effectiveness of ACE inhibitors for HTN (in contrast to other NSAIDs)<sup>93 94</sup>. However,  
46 aspirin can inhibit the renal clearance of acetazolamide and methotrexate potentially  
47 leading to increased blood concentrations of and toxicity from these agents. Salicylate  
48 can displace other drugs which are protein-bound, especially phenytoin and valproic acid,  
49 increasing their free drug concentrations in plasma. This may increase side effects,  
50 toxicity and/or efficacy for displaced drugs. If the BD subjects are currently receiving  
51  
52  
53  
54  
55  
56  
57  
58  
59  
60

1  
2  
3 valproic acid preparations (e.g., divalproex) then the plasma levels of these agents will be  
4 monitored for potential changes.  
5  
6

7  
8 Aspirin may cause a severe allergic reaction that may include: hives, asthma (wheezing),  
9 facial swelling, shock. Aspirin overdose can be fatal at 30 g or higher.  
10  
11

12  
13 In sum, we believe that our two-by-two design is appropriate for trials involving  
14 experimental drugs that already have been well-studied with respect to toxicity, as is the  
15 case with aspirin and minocycline. A parallel arm design, as opposed to a 2 x 2 factorial  
16 design, would be more clearly informative in the case of an experimental drug for which  
17 the toxicity and drug interaction potential have not been thoroughly studied in human  
18 subjects  
19  
20  
21  
22  
23

## 24 25 26 **PHI Protection**

27  
28 Paper copies of consents, screening forms, the Research Privacy Form, and any other  
29 forms, testing results or papers containing Protected Health Information (PHI) will be  
30 stored in a secured medical records room with access granted only to authorized  
31 personnel.  
32  
33  
34  
35  
36

37  
38 Electronic data that contain PHI will be managed in accordance with ISO 27000 series  
39 information security standards with policies developed from current NIST guidelines (SP  
40 800-66) for HIPAA and HITECH compliance. Specific controls implemented to protect  
41 PHI are derived from NIST 800-122, and include (but not limited to):  
42  
43  
44

- 45 1) Access Enforcement (AC-3) – Individual user accounts, role based access control,  
46 access control lists;
- 47 2) Separation of Duties (AC-5) – de-identification of data as appropriate,  
48 acquire/analyze/manage firewall;
- 49 3) Least Privilege (AC-6) – to ensure PHI data is only available to persons with  
50 established need for access;
- 51 4) Remote Access (AC-17) – Secure VPN, encrypted end devices;  
52  
53  
54  
55  
56  
57  
58  
59  
60

- 5) Access Control for Mobile Devices (AC-19) – Password login, remote destruction capabilities;
- 6) Auditable Events (AU-2) + Monitoring: Log detailed server and network information, alert for problems;
- 7) Analysis, and Reporting (AU-6) – Procedures to audit system records for inappropriate activity.
- 8) User Identification and Authentication (IA-2) – username/secure password and two factor authentication will be required when appropriate.
- 9) Media Access, Marking, Storage, and Transport (MP-2,3,4,5) – Records will be asset tagged and marked to their PHI status, PHI data will be secured and managed by professional system administrators, and will be transported via encryption (VPN, USB, File);
- 10) Media Sanitization (MP-6) – Data will be destroyed by SFHS in accordance with their policies and procedures;
- 11) Transmission Confidentiality (SC-9) – Encryption will be used when needed for all avenues of data transmission (wireless, network, etc.).

To protect subject confidentiality, blood samples will be anonymized as follows:

1. Last name: All participants will be assigned the last name “LIBR.”
2. First name: The first name will be a secure alpha cryptographic hash based on LIBR user ID. This technique is the gold standard in computer security for one-way correlation of data.

### **Benefits versus Risks**

The participant may benefit from participation if either study drug produces an antidepressant effect. Participants will also receive a free clinical evaluation; more frequent treatment visits than are typical in practice, diligent follow-up in terms of symptoms and side effects, and physical and psychiatric monitoring during the study. The risks of delaying alternative treatments are minimal in relation to the potential long-term benefits to the subjects and the importance of knowledge that may reasonably result. The



1  
2  
3 importance of the knowledge that will likely be gained from this study clearly exceeds  
4 the associated potential risks.  
5  
6  
7

### 8 9 **Alternative Treatment**

10  
11  
12 It is possible that some patients may feel better with talk therapy. Participating in any  
13 type of talk therapy with their psychiatrist or psychologist does not require dropping out  
14 of this study. Subjects will be encouraged to contact the study investigators, particularly  
15 the physician in the study, with any questions they may have regarding alternatives to  
16 treatment through this research study. The study investigators will assist in referring the  
17 subject to another physician for treatment after their participation in the study has ended.  
18 Physical and psychological testing, blood draws, urine samples, and EKG data provide no  
19 known risks to persons other than those listed in the exclusion criteria whereas the  
20 combinatory power of these measures may provide information relevant to understanding  
21 the pathophysiology of bipolar disorder.  
22  
23  
24  
25  
26  
27  
28  
29  
30  
31

### 32 **Data and Safety Monitoring Plan**

33  
34  
35  
36 This study involves more than minimal risk. The study progress will be overseen by a  
37 Data, Safety and Monitoring Board (DSMB). The DSMB is composed of three members  
38 who will meet in person or per telephone at least once every 6 months to review relevant  
39 study data including adverse events and dropout rates.  
40  
41  
42  
43

44  
45 Any unanticipated adverse events will be reported immediately to the IRB of record and  
46 to the LIBR Human Protection Administrator. Any adverse events will be included in the  
47 annual IRB report.  
48  
49

### 50 51 **Dissemination of Results**

52  
53  
54  
55 The study results will be presented at national and/or international biomedical scientific  
56 meetings and published in peer-reviewed journals.  
57  
58  
59  
60

## REGISTRATION

In accordance with the recommendations of the International Committee of Medical Journal Editors<sup>95</sup>, the proposed trial is registered in a public registry ([www.clinicaltrials.gov](http://www.clinicaltrials.gov) Identifier: NCT01429272).

### Figure Legend

#### **Figure 1: Schematic of Study Design**

*Legend: Each session number (total of 7) is encircled, with the timing between sessions indicated in weeks with a 2 business day window on either side of visit target date to complete the visit. Session 1 is the baseline (green star) and session 7 is the study end (purple star). Peripheral blood will be sampled at baseline and study end to assay markers of inflammation. The study duration is 6 weeks.*

### Author Contributions

All authors made a significant contribution to the conception and design of the study protocol. The protocol was written by Drs. Savitz and W. Drevets and was critically reviewed by Drs. Preskorn, Teague, D. Drevets, and Yates. All authors gave approval for the publication.

### Funding Statement

This work was funded by the Stanley Medical Research Institute, grant number 10T-1401. The SMRI assisted with the study design but plays no role in the collection, management, analysis, and interpretation of data; writing of the report; or the decision to submit the report for publication.

## Competing Interests

None of the authors has a conflict of interest to declare.

## References

1. Correa R, Akiskal H, Gilmer W, Nierenberg AA, Trivedi M, Zisook S. Is unrecognized bipolar disorder a frequent contributor to apparent treatment resistant depression? *J Affect Disord* 2010;127(1-3):10-8.
2. Tohen M, Vieta E, Calabrese J, Ketter TA, Sachs G, Bowden C, et al. Efficacy of olanzapine and olanzapine-fluoxetine combination in the treatment of bipolar I depression. *Arch Gen Psychiatry* 2003;60(11):1079-88.
3. Nierenberg AA, Ostacher MJ, Calabrese JR, Ketter TA, Marangell LB, Miklowitz DJ, et al. Treatment-resistant bipolar depression: a STEP-BD equipoise randomized effectiveness trial of antidepressant augmentation with lamotrigine, inositol, or risperidone. *Am J Psychiatry* 2006;163(2):210-6.
4. Nemeroff CB, Evans DL, Gyulai L, Sachs GS, Bowden CL, Gergel IP, et al. Double-blind, placebo-controlled comparison of imipramine and paroxetine in the treatment of bipolar depression. *Am J Psychiatry* 2001;158(6):906-12.
5. Mallinger AG, Frank E, Thase ME, Barwell MM, Diazgranados N, Luckenbaugh DA, et al. Revisiting the effectiveness of standard antidepressants in bipolar disorder: are monoamine oxidase inhibitors superior? *Psychopharmacol Bull* 2009;42(2):64-74.
6. Himmelhoch JM, Thase ME, Mallinger AG, Houck P. Tranylcypromine versus imipramine in anergic bipolar depression. *Am J Psychiatry* 1991;148(7):910-6.
7. Thase ME, Mallinger AG, McKnight D, Himmelhoch JM. Treatment of imipramine-resistant recurrent depression, IV: A double-blind crossover study of tranylcypromine for anergic bipolar depression. *Am J Psychiatry* 1992;149(2):195-8.
8. Savitz J, Drevets WC. Bipolar and major depressive disorder: neuroimaging the developmental-degenerative divide. *Neurosci Biobehav Rev* 2009;33(5):699-771.
9. Savitz JB, Drevets WC. Imaging phenotypes of major depressive disorder: genetic correlates. *Neuroscience* 2009;164(1):300-30.

10. Wang Y, Qin ZH. Molecular and cellular mechanisms of excitotoxic neuronal death. *Apoptosis* 2010;15(11):1382-402.
11. Mitchell ND, Baker GB. An update on the role of glutamate in the pathophysiology of depression. *Acta Psychiatr Scand* 2010;122(3):192-210.
12. Ryan B, Musazzi L, Mallei A, Tardito D, Gruber SH, El Khoury A, et al. Remodelling by early-life stress of NMDA receptor-dependent synaptic plasticity in a gene-environment rat model of depression. *Int J Neuropsychopharmacol* 2009;12(4):553-9.
13. Boyce-Rustay JM, Holmes A. Genetic inactivation of the NMDA receptor NR2A subunit has anxiolytic- and antidepressant-like effects in mice. *Neuropsychopharmacology* 2006;31(11):2405-14.
14. Tsunoka T, Kishi T, Ikeda M, Kitajima T, Yamanouchi Y, Kinoshita Y, et al. Association analysis of group II metabotropic glutamate receptor genes (GRM2 and GRM3) with mood disorders and fluvoxamine response in a Japanese population. *Prog Neuropsychopharmacol Biol Psychiatry* 2009;33(5):875-9.
15. Diazgranados N, Ibrahim L, Brutsche NE, Newberg A, Kronstein P, Khalife S, et al. A randomized add-on trial of an N-methyl-D-aspartate antagonist in treatment-resistant bipolar depression. *Arch Gen Psychiatry* 2010;67(8):793-802.
16. Zarate CA, Jr., Payne JL, Quiroz J, Sporn J, Denicoff KK, Luckenbaugh D, et al. An open-label trial of riluzole in patients with treatment-resistant major depression. *Am J Psychiatry* 2004;161(1):171-4.
17. Dowlati Y, Herrmann N, Swardfager W, Liu H, Sham L, Reim EK, et al. A meta-analysis of cytokines in major depression. *Biol Psychiatry* 2010;67(5):446-57.
18. Pace TW, Miller AH. Cytokines and glucocorticoid receptor signaling. Relevance to major depression. *Ann N Y Acad Sci* 2009;1179:86-105.
19. Maes M, Scharpe S, Van Grootel L, Uyttenbroeck W, Cooreman W, Cosyns P, et al. Higher alpha 1-antitrypsin, haptoglobin, ceruloplasmin and lower retinol binding protein plasma levels during depression: further evidence for the existence of an inflammatory response during that illness. *J Affect Disord* 1992;24(3):183-92.
20. Motivala SJ, Sarfatti A, Olmos L, Irwin MR. Inflammatory markers and sleep disturbance in major depression. *Psychosom Med* 2005;67(2):187-94.
21. Song C, Dinan T, Leonard BE. Changes in immunoglobulin, complement and acute phase protein levels in the depressed patients and normal controls. *J Affect Disord* 1994;30(4):283-8.
22. Tying S, Gottlieb A, Papp K, Gordon K, Leonardi C, Wang A, et al. Etanercept and clinical outcomes, fatigue, and depression in psoriasis: double-blind placebo-controlled randomised phase III trial. *Lancet* 2006;367(9504):29-35.
23. Drexhage RC, Knijff EM, Padmos RC, Heul-Nieuwenhuijzen L, Beumer W, Versnel MA, et al. The mononuclear phagocyte system and its cytokine inflammatory networks in schizophrenia and bipolar disorder. *Expert Rev Neurother* 2010;10(1):59-76.
24. Leonard BE. The immune system, depression and the action of antidepressants. *Prog Neuropsychopharmacol Biol Psychiatry* 2001;25(4):767-80.

- 1
- 2
- 3
- 4 25. Dantzer R, O'Connor JC, Freund GG, Johnson RW, Kelley KW. From inflammation
- 5 to sickness and depression: when the immune system subjugates the brain.
- 6 *Nat Rev Neurosci* 2008;9(1):46-56.
- 7
- 8 26. Maes M. Depression is an inflammatory disease, but cell-mediated immune
- 9 activation is the key component of depression. *Prog Neuropsychopharmacol*
- 10 *Biol Psychiatry* 2010.
- 11
- 12 27. Miller AH, Maletic V, Raison CL. Inflammation and its discontents: the role of
- 13 cytokines in the pathophysiology of major depression. *Biol Psychiatry*
- 14 2009;65(9):732-41.
- 15
- 16 28. Pariante CM, Pearce BD, Pisell TL, Sanchez CI, Po C, Su C, et al. The
- 17 proinflammatory cytokine, interleukin-1alpha, reduces glucocorticoid
- 18 receptor translocation and function. *Endocrinology* 1999;140(9):4359-66.
- 19
- 20 29. Ongur D, Drevets WC, Price JL. Glial reduction in the subgenual prefrontal cortex
- 21 in mood disorders. *Proc Natl Acad Sci U S A* 1998;95(22):13290-5.
- 22
- 23 30. Raison CL, Dantzer R, Kelley KW, Lawson MA, Woolwine BJ, Vogt G, et al. CSF
- 24 concentrations of brain tryptophan and kynurenines during immune
- 25 stimulation with IFN-alpha: relationship to CNS immune responses and
- 26 depression. *Mol Psychiatry* 2010;15(4):393-403.
- 27
- 28 31. Gabbay V, Klein RG, Katz Y, Mendoza S, Guttman LE, Alonso CM, et al. The
- 29 possible role of the kynurenine pathway in adolescent depression with
- 30 melancholic features. *J Child Psychol Psychiatry* 2010;51(8):935-43.
- 31
- 32 32. Padmos RC, Hillegers MH, Knijff EM, Vonk R, Bouvy A, Staal FJ, et al. A
- 33 discriminating messenger RNA signature for bipolar disorder formed by an
- 34 aberrant expression of inflammatory genes in monocytes. *Arch Gen*
- 35 *Psychiatry* 2008;65(4):395-407.
- 36
- 37 33. Zemke D, Majid A. The potential of minocycline for neuroprotection in human
- 38 neurologic disease. *Clin Neuropharmacol* 2004;27(6):293-8.
- 39
- 40 34. Elewa HF, Hilali H, Hess DC, Machado LS, Fagan SC. Minocycline for short-term
- 41 neuroprotection. *Pharmacotherapy* 2006;26(4):515-21.
- 42
- 43 35. Hailer NP. Immunosuppression after traumatic or ischemic CNS damage: it is
- 44 neuroprotective and illuminates the role of microglial cells. *Prog Neurobiol*
- 45 2008;84(3):211-33.
- 46
- 47 36. Pae CU, Marks DM, Han C, Patkar AA. Does minocycline have antidepressant
- 48 effect? *Biomed Pharmacother* 2008;62(5):308-11.
- 49
- 50 37. Wang J, Wei Q, Wang CY, Hill WD, Hess DC, Dong Z. Minocycline up-regulates Bcl-
- 51 2 and protects against cell death in mitochondria. *J Biol Chem*
- 52 2004;279(19):19948-54.
- 53
- 54 38. Chen G, Zeng WZ, Yuan PX, Huang LD, Jiang YM, Zhao ZH, et al. The mood-
- 55 stabilizing agents lithium and valproate robustly increase the levels of the
- 56 neuroprotective protein bcl-2 in the CNS. *J Neurochem* 1999;72(2):879-82.
- 57
- 58 39. Kosten TA, Galloway MP, Duman RS, Russell DS, D'Sa C. Repeated unpredictable
- 59 stress and antidepressants differentially regulate expression of the bcl-2
- 60 family of apoptotic genes in rat cortical, hippocampal, and limbic brain
- structures. *Neuropsychopharmacology* 2008;33(7):1545-58.
40. Youle RJ, Strasser A. The BCL-2 protein family: opposing activities that mediate
- cell death. *Nat Rev Mol Cell Biol* 2008;9(1):47-59.

- 1  
2  
3  
4  
5  
6  
7  
8  
9  
10  
11  
12  
13  
14  
15  
16  
17  
18  
19  
20  
21  
22  
23  
24  
25  
26  
27  
28  
29  
30  
31  
32  
33  
34  
35  
36  
37  
38  
39  
40  
41  
42  
43  
44  
45  
46  
47  
48  
49  
50  
51  
52  
53  
54  
55  
56  
57  
58  
59  
60
41. Bailey MT, Dowd SE, Galley JD, Hufnagle AR, Allen RG, Lyte M. Exposure to a social stressor alters the structure of the intestinal microbiota: implications for stressor-induced immunomodulation. *Brain, behavior, and immunity* 2011;25(3):397-407.
42. Tikka T, Fiebich BL, Goldsteins G, Keinanen R, Koistinaho J. Minocycline, a tetracycline derivative, is neuroprotective against excitotoxicity by inhibiting activation and proliferation of microglia. *J Neurosci* 2001;21(8):2580-8.
43. Cornet S, Spinnewyn B, Delaflotte S, Charnet C, Roubert V, Favre C, et al. Lack of evidence of direct mitochondrial involvement in the neuroprotective effect of minocycline. *Eur J Pharmacol* 2004;505(1-3):111-9.
44. Yrjanheikki J, Keinanen R, Pellikka M, Hokfelt T, Koistinaho J. Tetracyclines inhibit microglial activation and are neuroprotective in global brain ischemia. *Proc Natl Acad Sci U S A* 1998;95(26):15769-74.
45. Sanchez Mejia RO, Ona VO, Li M, Friedlander RM. Minocycline reduces traumatic brain injury-mediated caspase-1 activation, tissue damage, and neurological dysfunction. *Neurosurgery* 2001;48(6):1393-9; discussion 99-401.
46. Bilousova TV, Dansie L, Ngo M, Aye J, Charles JR, Ethell DW, et al. Minocycline promotes dendritic spine maturation and improves behavioural performance in the fragile X mouse model. *J Med Genet* 2009;46(2):94-102.
47. Stirling DP, Khodarahmi K, Liu J, McPhail LT, McBride CB, Steeves JD, et al. Minocycline treatment reduces delayed oligodendrocyte death, attenuates axonal dieback, and improves functional outcome after spinal cord injury. *J Neurosci* 2004;24(9):2182-90.
48. Zhang L, Shirayama Y, Shimizu E, Iyo M, Hashimoto K. Protective effects of minocycline on 3,4-methylenedioxymethamphetamine-induced neurotoxicity in serotonergic and dopaminergic neurons of mouse brain. *Eur J Pharmacol* 2006;544(1-3):1-9.
49. Greenwald RA, Moak SA, Ramamurthy NS, Golub LM. Tetracyclines suppress matrix metalloproteinase activity in adjuvant arthritis and in combination with flurbiprofen, ameliorate bone damage. *J Rheumatol* 1992;19(6):927-38.
50. Brundula V, Rewcastle NB, Metz LM, Bernard CC, Yong VW. Targeting leukocyte MMPs and transmigration: minocycline as a potential therapy for multiple sclerosis. *Brain* 2002;125(Pt 6):1297-308.
51. Zhu S, Stavrovskaya IG, Drozda M, Kim BY, Ona V, Li M, et al. Minocycline inhibits cytochrome c release and delays progression of amyotrophic lateral sclerosis in mice. *Nature* 2002;417(6884):74-8.
52. Wang X, Zhu S, Drozda M, Zhang W, Stavrovskaya IG, Cattaneo E, et al. Minocycline inhibits caspase-independent and -dependent mitochondrial cell death pathways in models of Huntington's disease. *Proc Natl Acad Sci U S A* 2003;100(18):10483-7.
53. Bonelli RM, Hodl AK, Hofmann P, Kapfhammer HP. Neuroprotection in Huntington's disease: a 2-year study on minocycline. *Int Clin Psychopharmacol* 2004;19(6):337-42.
54. O'Dell JR, Blakely KW, Mallek JA, Eckhoff PJ, Leff RD, Wees SJ, et al. Treatment of early seropositive rheumatoid arthritis: a two-year, double-blind comparison



- of minocycline and hydroxychloroquine. *Arthritis Rheum* 2001;44(10):2235-41.
55. Lampl Y, Boaz M, Gilad R, Lorberboym M, Dabby R, Rapoport A, et al. Minocycline treatment in acute stroke: an open-label, evaluator-blinded study. *Neurology* 2007;69(14):1404-10.
56. Miyaoka T, Yasukawa R, Yasuda H, Hayashida M, Inagaki T, Horiguchi J. Possible antipsychotic effects of minocycline in patients with schizophrenia. *Prog Neuropsychopharmacol Biol Psychiatry* 2007;31(1):304-7.
57. Miyaoka T, Yasukawa R, Yasuda H, Hayashida M, Inagaki T, Horiguchi J. Minocycline as adjunctive therapy for schizophrenia: an open-label study. *Clin Neuropharmacol* 2008;31(5):287-92.
58. Levkovitz Y, Mendlovich S, Riwkes S, Braw Y, Levkovitch-Verbin H, Gal G, et al. A double-blind, randomized study of minocycline for the treatment of negative and cognitive symptoms in early-phase schizophrenia. *J Clin Psychiatry* 2010;71(2):138-49.
59. Molina-Hernandez M, Tellez-Alcantara NP, Perez-Garcia J, Olivera-Lopez JI, Jaramillo-Jaimes MT. Antidepressant-like actions of minocycline combined with several glutamate antagonists. *Prog Neuropsychopharmacol Biol Psychiatry* 2008;32(2):380-6.
60. Molina-Hernandez M, Tellez-Alcantara NP, Perez-Garcia J, Olivera-Lopez JI, Jaramillo-Jaimes MT. Desipramine or glutamate antagonists synergized the antidepressant-like actions of intra-nucleus accumbens infusions of minocycline in male Wistar rats. *Prog Neuropsychopharmacol Biol Psychiatry* 2008;32(7):1660-6.
61. O'Connor JC, Lawson MA, Andre C, Moreau M, Lestage J, Castanon N, et al. Lipopolysaccharide-induced depressive-like behavior is mediated by indoleamine 2,3-dioxygenase activation in mice. *Mol Psychiatry* 2009;14(5):511-22.
62. Levine J, Cholestoy A, Zimmerman J. Possible antidepressant effect of minocycline. *Am J Psychiatry* 1996;153(4):582.
63. Cipollone F, Patrignani P, Greco A, Panara MR, Padovano R, Cuccurullo F, et al. Differential suppression of thromboxane biosynthesis by indobufen and aspirin in patients with unstable angina. *Circulation* 1997;96(4):1109-16.
64. Choi SH, Aid S, Bosetti F. The distinct roles of cyclooxygenase-1 and -2 in neuroinflammation: implications for translational research. *Trends Pharmacol Sci* 2009;30(4):174-81.
65. Choi SH, Aid S, Choi U, Bosetti F. Cyclooxygenases-1 and -2 differentially modulate leukocyte recruitment into the inflamed brain. *Pharmacogenomics J* 2010;10(5):448-57.
66. Choi SH, Bosetti F. Cyclooxygenase-1 null mice show reduced neuroinflammation in response to beta-amyloid. *Aging (Albany NY)* 2009;1(2):234-44.
67. Bosetti F, Weerasinghe GR, Rosenberger TA, Rapoport SI. Valproic acid down-regulates the conversion of arachidonic acid to eicosanoids via cyclooxygenase-1 and -2 in rat brain. *J Neurochem* 2003;85(3):690-6.



- 1  
2  
3  
4  
5  
6  
7  
8  
9  
10  
11  
12  
13  
14  
15  
16  
17  
18  
19  
20  
21  
22  
23  
24  
25  
26  
27  
28  
29  
30  
31  
32  
33  
34  
35  
36  
37  
38  
39  
40  
41  
42  
43  
44  
45  
46  
47  
48  
49  
50  
51  
52  
53  
54  
55  
56  
57  
58  
59  
60
68. Weerasinghe GR, Rapoport SI, Bosetti F. The effect of chronic lithium on arachidonic acid release and metabolism in rat brain does not involve secretory phospholipase A2 or lipoxygenase/cytochrome P450 pathways. *Brain Res Bull* 2004;63(6):485-9.
69. Ramadan E, Basselin M, Rao JS, Chang L, Chen M, Ma K, et al. Lamotrigine blocks NMDA receptor-initiated arachidonic acid signalling in rat brain: implications for its efficacy in bipolar disorder. *Int J Neuropsychopharmacol* 2011:1-13.
70. Stolk P, Souverein PC, Wilting I, Leufkens HG, Klein DF, Rapoport SI, et al. Is aspirin useful in patients on lithium? A pharmacoepidemiological study related to bipolar disorder. *Prostaglandins Leukot Essent Fatty Acids* 2010;82(1):9-14.
71. Phelan KM, Mosholder AD, Lu S. Lithium interaction with the cyclooxygenase 2 inhibitors rofecoxib and celecoxib and other nonsteroidal anti-inflammatory drugs. *J Clin Psychiatry* 2003;64(11):1328-34.
72. Mendlewicz J, Kriwin P, Oswald P, Souery D, Alboni S, Brunello N. Shortened onset of action of antidepressants in major depression using acetylsalicylic acid augmentation: a pilot open-label study. *Int Clin Psychopharmacol* 2006;21(4):227-31.
73. Ketterer MW, Brymer J, Rhoads K, Kraft P, Lovallo WR. Is aspirin, as used for antithrombosis, an emotion-modulating agent? *J Psychosom Res* 1996;40(1):53-8.
74. Nery FG, Monkul ES, Hatch JP, Fonseca M, Zunta-Soares GB, Frey BN, et al. Celecoxib as an adjunct in the treatment of depressive or mixed episodes of bipolar disorder: a double-blind, randomized, placebo-controlled study. *Hum Psychopharmacol* 2008;23(2):87-94.
75. Muller N, Schwarz MJ, Dehning S, Douhe A, Cerovecki A, Goldstein-Muller B, et al. The cyclooxygenase-2 inhibitor celecoxib has therapeutic effects in major depression: results of a double-blind, randomized, placebo controlled, add-on pilot study to reboxetine. *Mol Psychiatry* 2006;11(7):680-4.
76. Akhondzadeh S, Jafari S, Raisi F, Nasehi AA, Ghoreishi A, Salehi B, et al. Clinical trial of adjunctive celecoxib treatment in patients with major depression: a double blind and placebo controlled trial. *Depress Anxiety* 2009;26(7):607-11.
77. Maier SF. Bi-directional immune-brain communication: Implications for understanding stress, pain, and cognition. *Brain Behav Immun* 2003;17(2):69-85.
78. Howren MB, Lamkin DM, Suls J. Associations of depression with C-reactive protein, IL-1, and IL-6: a meta-analysis. *Psychosom Med* 2009;71(2):171-86.
79. Renner U, De Santana EC, Gerez J, Frohlich B, Haedo M, Pereda MP, et al. Intrapituitary expression and regulation of the gp130 cytokine interleukin-6 and its implication in pituitary physiology and pathophysiology. *Ann N Y Acad Sci* 2009;1153:89-97.
80. Mallinckrodt CH, Clark WS, David SR. Accounting for dropout bias using mixed-effects models. *J Biopharm Stat* 2001;11(1-2):9-21.

- 1  
2  
3 81. Siddiqui O, Hung HM, O'Neill R. MMRM vs. LOCF: a comprehensive comparison  
4 based on simulation study and 25 NDA datasets. *J Biopharm Stat*  
5 2009;19(2):227-46.
- 6  
7 82. Meier-Ewert HK, Ridker PM, Rifai N, Price N, Dinges DF, Mullington JM. Absence  
8 of diurnal variation of C-reactive protein concentrations in healthy human  
9 subjects. *Clin Chem* 2001;47(3):426-30.
- 10  
11 83. Vgontzas AN, Bixler EO, Lin HM, Prolo P, Trakada G, Chrousos GP. IL-6 and its  
12 circadian secretion in humans. *Neuroimmunomodulation* 2005;12(3):131-40.
- 13  
14 84. Nierenberg AA, DeCecco LM. Definitions of antidepressant treatment response,  
15 remission, nonresponse, partial response, and other relevant outcomes: a  
16 focus on treatment-resistant depression. *J Clin Psychiatry* 2001;62 Suppl  
17 16:5-9.
- 18  
19 85. Rief W, Nestoriuc Y, Weiss S, Welzel E, Barsky AJ, Hofmann SG. Meta-analysis of  
20 the placebo response in antidepressant trials. *J Affect Disord* 2009;118(1-  
21 3):1-8.
- 22  
23 86. Goldberg JF, Perlis RH, Ghaemi SN, Calabrese JR, Bowden CL, Wisniewski S, et al.  
24 Adjunctive antidepressant use and symptomatic recovery among bipolar  
25 depressed patients with concomitant manic symptoms: findings from the  
26 STEP-BD. *Am J Psychiatry* 2007;164(9):1348-55.
- 27  
28 87. Gordon PH, Moore DH, Gelinas DF, Qualls C, Meister ME, Werner J, et al. Placebo-  
29 controlled phase I/II studies of minocycline in amyotrophic lateral sclerosis.  
30 *Neurology* 2004;62(10):1845-7.
- 31  
32 88. Collaborative meta-analysis of randomised trials of antiplatelet therapy for  
33 prevention of death, myocardial infarction, and stroke in high risk patients.  
34 *BMJ* 2002;324(7329):71-86.
- 35  
36 89. Fries S, Grosser T. The cardiovascular pharmacology of COX-2 inhibition.  
37 *Hematology Am Soc Hematol Educ Program* 2005:445-51.
- 38  
39 90. Grosser T, Yu Y, Fitzgerald GA. Emotion recollected in tranquility: lessons  
40 learned from the COX-2 saga. *Annu Rev Med* 2010;61:17-33.
- 41  
42 91. Patrono C, Collier B, Fitzgerald GA, Hirsh J, Roth G. Platelet-active drugs: the  
43 relationships among dose, effectiveness, and side effects: the Seventh ACCP  
44 Conference on Antithrombotic and Thrombolytic Therapy. *Chest* 2004;126(3  
45 Suppl):234S-64S.
- 46  
47 92. Hansson L, Zanchetti A, Carruthers SG, Dahlof B, Elmfeldt D, Julius S, et al. Effects  
48 of intensive blood-pressure lowering and low-dose aspirin in patients with  
49 hypertension: principal results of the Hypertension Optimal Treatment  
50 (HOT) randomised trial. HOT Study Group. *Lancet* 1998;351(9118):1755-62.
- 51  
52 93. Zanchetti A, Hansson L, Leonetti G, Rahn KH, Ruilope L, Warnold I, et al. Low-  
53 dose aspirin does not interfere with the blood pressure-lowering effects of  
54 antihypertensive therapy. *J Hypertens* 2002;20(5):1015-22.
- 55  
56 94. Teo KK, Yusuf S, Pfeffer M, Torp-Pedersen C, Kober L, Hall A, et al. Effects of long-  
57 term treatment with angiotensin-converting-enzyme inhibitors in the  
58 presence or absence of aspirin: a systematic review. *Lancet*  
59 2002;360(9339):1037-43.  
60

1  
2  
3 95. De Angelis C, Drazen JM, Frizelle FA, Haug C, Hoey J, Horton R, et al. Clinical trial  
4 registration: a statement from the International Committee of Medical  
5 Journal Editors. *N Engl J Med* 2004;351(12):1250-1.  
6  
7  
8  
9  
10  
11  
12  
13  
14  
15  
16  
17  
18  
19  
20  
21  
22  
23  
24  
25  
26  
27  
28  
29  
30  
31  
32  
33  
34  
35  
36  
37  
38  
39  
40  
41  
42  
43  
44  
45  
46  
47  
48  
49  
50  
51  
52  
53  
54  
55  
56  
57  
58  
59  
60

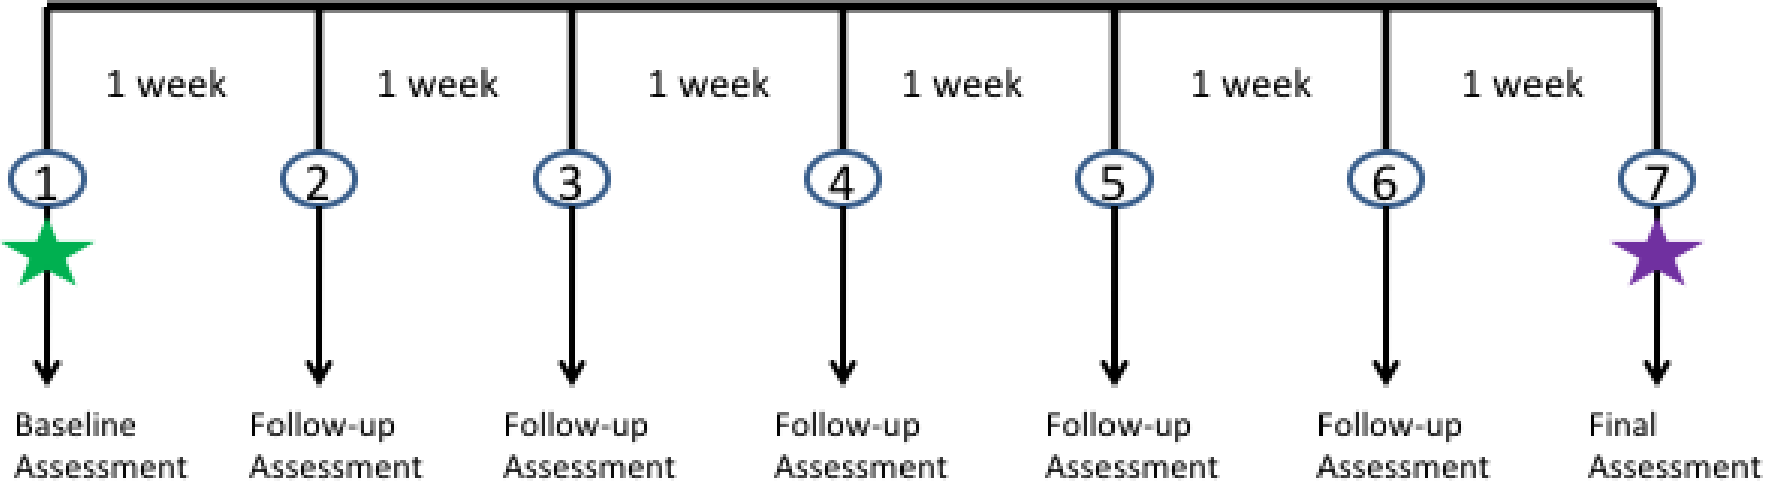

Minocycline  
dose initiation  
at 100mg bid

Aspirin dose  
initiation at  
81mg bid

Placebo  
initiated

Inflammation  
markers

Inflammation  
markers

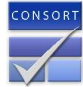

## CONSORT 2010 checklist of information to include when reporting a randomised trial\*

| Section/Topic                    | Item No | Checklist item                                                                                                                                                                              | Reported on page No |
|----------------------------------|---------|---------------------------------------------------------------------------------------------------------------------------------------------------------------------------------------------|---------------------|
| <b>Title and abstract</b>        |         |                                                                                                                                                                                             |                     |
|                                  | 1a      | Identification as a randomised trial in the title                                                                                                                                           | 1                   |
|                                  | 1b      | Structured summary of trial design, methods, results, and conclusions (for specific guidance see CONSORT for abstracts)                                                                     | 2                   |
| <b>Introduction</b>              |         |                                                                                                                                                                                             |                     |
| Background and objectives        | 2a      | Scientific background and explanation of rationale                                                                                                                                          | 3-13                |
|                                  | 2b      | Specific objectives or hypotheses                                                                                                                                                           | 20                  |
| <b>Methods</b>                   |         |                                                                                                                                                                                             |                     |
| Trial design                     | 3a      | Description of trial design (such as parallel, factorial) including allocation ratio                                                                                                        | 14-15               |
|                                  | 3b      | Important changes to methods after trial commencement (such as eligibility criteria), with reasons                                                                                          | NA                  |
| Participants                     | 4a      | Eligibility criteria for participants                                                                                                                                                       | 13-14               |
|                                  | 4b      | Settings and locations where the data were collected                                                                                                                                        | 17                  |
| Interventions                    | 5       | The interventions for each group with sufficient details to allow replication, including how and when they were actually administered                                                       | 15-16               |
| Outcomes                         | 6a      | Completely defined pre-specified primary and secondary outcome measures, including how and when they were assessed                                                                          | 20-21               |
|                                  | 6b      | Any changes to trial outcomes after the trial commenced, with reasons                                                                                                                       | NA                  |
| Sample size                      | 7a      | How sample size was determined                                                                                                                                                              | 21                  |
|                                  | 7b      | When applicable, explanation of any interim analyses and stopping guidelines                                                                                                                | 30                  |
| <b>Randomisation:</b>            |         |                                                                                                                                                                                             |                     |
| Sequence generation              | 8a      | Method used to generate the random allocation sequence                                                                                                                                      | 15                  |
|                                  | 8b      | Type of randomisation; details of any restriction (such as blocking and block size)                                                                                                         |                     |
| Allocation concealment mechanism | 9       | Mechanism used to implement the random allocation sequence (such as sequentially numbered containers), describing any steps taken to conceal the sequence until interventions were assigned | 15                  |
| Implementation                   | 10      | Who generated the random allocation sequence, who enrolled participants, and who assigned participants to interventions                                                                     | 15                  |
| Blinding                         | 11a     | If done, who was blinded after assignment to interventions (for example, participants, care providers, those                                                                                | 15                  |

|    |                          |                                                                                                                     |       |
|----|--------------------------|---------------------------------------------------------------------------------------------------------------------|-------|
| 1  |                          |                                                                                                                     |       |
| 2  |                          | assessing outcomes) and how                                                                                         |       |
| 3  |                          |                                                                                                                     |       |
| 4  |                          | 11b If relevant, description of the similarity of interventions                                                     |       |
| 5  | Statistical methods      | 12a Statistical methods used to compare groups for primary and secondary outcomes                                   | 20-21 |
| 6  |                          | 12b Methods for additional analyses, such as subgroup analyses and adjusted analyses                                | 20-21 |
| 7  |                          |                                                                                                                     |       |
| 8  | <b>Results</b>           |                                                                                                                     |       |
| 9  | Participant flow (a      | 13a For each group, the numbers of participants who were randomly assigned, received intended treatment, and        |       |
| 10 | diagram is strongly      | were analysed for the primary outcome                                                                               |       |
| 11 | recommended)             | 13b For each group, losses and exclusions after randomisation, together with reasons                                |       |
| 12 | Recruitment              | 14a Dates defining the periods of recruitment and follow-up                                                         |       |
| 13 |                          | 14b Why the trial ended or was stopped                                                                              |       |
| 14 |                          |                                                                                                                     |       |
| 15 | Baseline data            | 15 A table showing baseline demographic and clinical characteristics for each group                                 |       |
| 16 | Numbers analysed         | 16 For each group, number of participants (denominator) included in each analysis and whether the analysis was      |       |
| 17 |                          | by original assigned groups                                                                                         |       |
| 18 |                          |                                                                                                                     |       |
| 19 | Outcomes and             | 17a For each primary and secondary outcome, results for each group, and the estimated effect size and its           |       |
| 20 | estimation               | precision (such as 95% confidence interval)                                                                         |       |
| 21 |                          | 17b For binary outcomes, presentation of both absolute and relative effect sizes is recommended                     |       |
| 22 | Ancillary analyses       | 18 Results of any other analyses performed, including subgroup analyses and adjusted analyses, distinguishing       |       |
| 23 |                          | pre-specified from exploratory                                                                                      |       |
| 24 |                          |                                                                                                                     |       |
| 25 | Harms                    | 19 All important harms or unintended effects in each group (for specific guidance see CONSORT for harms)            |       |
| 26 |                          |                                                                                                                     |       |
| 27 | <b>Discussion</b>        |                                                                                                                     |       |
| 28 | Limitations              | 20 Trial limitations, addressing sources of potential bias, imprecision, and, if relevant, multiplicity of analyses |       |
| 29 | Generalisability         | 21 Generalisability (external validity, applicability) of the trial findings                                        |       |
| 30 | Interpretation           | 22 Interpretation consistent with results, balancing benefits and harms, and considering other relevant evidence    |       |
| 31 |                          |                                                                                                                     |       |
| 32 | <b>Other information</b> |                                                                                                                     |       |
| 33 | Registration             | 23 Registration number and name of trial registry                                                                   | 1, 30 |
| 34 | Protocol                 | 24 Where the full trial protocol can be accessed, if available                                                      | 19    |
| 35 | Funding                  | 25 Sources of funding and other support (such as supply of drugs), role of funders                                  |       |
| 36 |                          |                                                                                                                     |       |

\*We strongly recommend reading this statement in conjunction with the CONSORT 2010 Explanation and Elaboration for important clarifications on all the items. If relevant, we also recommend reading CONSORT extensions for cluster randomised trials, non-inferiority and equivalence trials, non-pharmacological treatments, herbal interventions, and pragmatic trials. Additional extensions are forthcoming: for those and for up to date references relevant to this checklist, see [www.consort-statement.org](http://www.consort-statement.org).

**THE FOLLOWING WERE APPROVED**

**INVESTIGATOR:** Wayne Drevets M.D.  
6655 South Yale Avenue  
Tulsa, Oklahoma 74136

**BOARD ACTION DATE:** 08/22/2011  
**PANEL:** 6  
**STUDY APPROVAL EXPIRES:** 08/05/2012  
**STUDY NUM:** 1126576  
**WIRB PRO NUM:** 20111159  
**INVEST NUM:** 160921  
**WO NUM:** 1-683377-1  
**CONTINUING REVIEW:** Annually  
**SITE STATUS REPORTING:** Semi-Annual

**SPONSOR:** Laureate Institute for Brain Research (LIBR)  
**PROTOCOL NUM:** 2011-002-00  
**AMD. PRO. NUM:**  
**TITLE:**  
MINOCYCLINE AND ASPIRIN IN THE TREATMENT OF BIPOLAR DEPRESSION

**APPROVAL INCLUDES:**  
Subject Information Sheet - Visit Five #9212383.0 - As Submitted  
Subject Information Sheet - Visit Four #9212382.0 - As Submitted  
Subject Information Sheet - Visit One #9212379.0 - As Submitted  
Subject Information Sheet - Visit Six #9212384.0 - As Submitted  
Subject Information Sheet - Visit Three #9212381.0 - As Submitted  
Subject Information Sheet - Visit Two #9212380.0 - As Submitted  
Consent Form [IN1]

**WIRB APPROVAL IS GRANTED SUBJECT TO:**  
**RE-CONSENTING INSTRUCTIONS:** Subjects currently enrolled are not required to sign the enclosed version(s) of the consent form(s). All subjects who will be enrolled in the future for this study must sign the most current WIRB-approved consent form(s).

**WIRB HAS APPROVED THE FOLLOWING LOCATIONS TO BE USED IN THE RESEARCH:**  
Laureate Institute for Brain Research, 6655 South Yale Avenue, Tulsa, Oklahoma 74136  
University of Kansas Medical Center Research Institute, 8911 East Orme, Wichita, Kansas 67207

**If the PI has an obligation to use another IRB for any site listed above and has not submitted a written statement from the other IRB acknowledging WIRB's review of this research, please contact WIRB's Client Services department.**

IF YOU HAVE ANY QUESTIONS, CONTACT WIRB AT 1-800-562-4789

This is to certify that the information contained herein is true and correct as reflected in the records of the Western Institutional Review Board (WIRB), OHRP/FDA parent organization number IORG 0000432, IRB registration number IRB00000533. WE CERTIFY THAT WIRB IS IN FULL COMPLIANCE WITH GOOD CLINICAL PRACTICES AS DEFINED UNDER THE U.S. FOOD AND DRUG ADMINISTRATION (FDA) REGULATIONS, U.S. DEPARTMENT OF HEALTH AND HUMAN SERVICES (HHS) REGULATIONS, AND THE INTERNATIONAL CONFERENCE ON HARMONISATION (ICH) GUIDELINES.

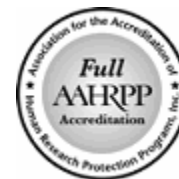

*Robert A Taylor for*

Theodore D. Schultz, J.D., Chairman

8/23/2011

(Date)

This document electronically reviewed and approved by Taylor, Robert on 8/23/2011 1:46:33 PM PST. For more information call Client Services at 1-360-252-2500.  
**For peer review only - <http://bmjopen.bmj.com/site/about/guidelines.xhtml>**



**ALL WIRB APPROVED INVESTIGATORS MUST COMPLY WITH THE FOLLOWING:**

1. Conduct the research in accordance with the protocol, applicable laws and regulations, and the principles of research ethics as set forth in the Belmont Report.
2. Although a participant is not obliged to give his or her reasons for withdrawing prematurely from the clinical trial, the investigator should make a reasonable effort to ascertain the reason, while fully respecting the participant's rights.
3. Unless consent has been waived, conduct the informed consent process without coercion or undue influence, and provide the potential subject sufficient opportunity to consider whether or not to participate. (Due to the unique circumstances of research conducted at international sites outside the United States and Canada where WIRB approved materials are translated into the local language, the following requirements regarding consent forms bearing the WIRB approval stamp and regarding certification of translations are not applicable.)
  - a. Use only the most current consent form bearing the WIRB "APPROVED" stamp.
  - b. Provide non-English speaking subjects with a certified translation of the approved consent form in the subject's first language. The translation must be approved by WIRB.
  - c. Obtain pre-approval from WIRB for use of recruitment materials and other materials provided to subjects.

4. Obtain pre-approval from WIRB for changes in research.

5. Obtain pre-approval from WIRB for planned deviations and changes in research activity as follows:

If this research is federally funded or conducted under an FWA, obtain pre-approval from WIRB for all planned deviations and changes in research activity, except where necessary to eliminate apparent immediate hazards to the human subjects. OHRP considers all planned protocol deviations to be changes in research that need prior IRB review and approval.

If this research is **not** federally funded and **not** conducted under an FWA, obtain pre-approval from WIRB for any planned deviations that could adversely affect the rights, safety or welfare of subjects, or the integrity of the research data and any changes in the research activity, except where necessary to eliminate apparent immediate hazards to the human subjects. FDA has not adopted the policy that all planned protocol deviations are changes in research that need prior IRB review and approval.

Deviations necessary to eliminate apparent immediate hazards to the human subjects should be reported within 10 days.

6. Promptly report to WIRB all unanticipated problems (adverse events, protocol deviations and violations and other problems) that meet all of the following criteria:
  - a. Unexpected (in terms of nature, severity or frequency);
  - b. Related or possibly related to participation in the research; and
  - c. Suggests that the research places subjects or others at a greater risk of harm than was previously known or recognized.

Please go to [www.wirb.com](http://www.wirb.com) for complete definitions and forms for reporting.

7. Provide reports to WIRB concerning the progress of the research, when requested.
8. Ensure that prior to performing study-related duties, each member of the research study team has had training in the protection of human subjects appropriate to the processes required in the approved protocol.

**Federal regulations require that WIRB conduct continuing review of approved research. You will receive Continuing Review Report forms from WIRB. These reports must be returned even though your study may not have started.**

1  
2  
3  
4  
5  
6  
7  
8  
9  
10  
11  
12  
13  
14  
15  
16  
17  
18  
19  
20  
21  
22  
23  
24  
25  
26  
27  
28  
29  
30  
31  
32  
33  
34  
35  
36  
37  
38  
39  
40  
41  
42  
43  
44  
45  
46  
47  
48  
49  
50  
51  
52  
53  
54  
55  
56  
57  
58  
59  
60

**DISTRIBUTION OF COPIES:**

**Contact, Company**

Karen Blackwell M.S., University of Kansas Medical Center

Rebecca Fears, Laureate Institute for Brain Research

Wayne Drevets M.D., Laureate Institute for Brain Research

For peer review only
